# Supplementary material
Source: publisher figshare collection journal article supplement (https://acs.figshare.com/ndownloader/files/4471474)
Supplement: Supplementary file 1 [file 4471474]

Supporting Information for:

**Cationic Polymerization and Insertion Chemistry in the Reactions of Vinyl Ethers with  
( $\alpha$ -diimine)PdMe<sup>+</sup> Species**

Changle Chen, Shuji Luo and Richard F. Jordan\*

Department of Chemistry, The University of Chicago

5735 South Ellis Avenue, Chicago, Illinois, 60637

E-mail: [rfjordan@uchicago.edu](mailto:rfjordan@uchicago.edu)

**Contents**

|                                                                                                                                                                                     |     |
|-------------------------------------------------------------------------------------------------------------------------------------------------------------------------------------|-----|
| <b>1. Materials and Methods</b> .....                                                                                                                                               | S4  |
| 1.1 NMR characterization of some known compounds.....                                                                                                                               | S4  |
| 1.2 Derivation of eq 7 of the manuscript and estimation of limits for $k_{\beta\text{-OR}}$ for <b>5c-f</b> .....                                                                   | S6  |
| 1.3 Estimation of limits for $k_{\beta\text{-OR}}$ for <b>5c-f</b> based on the steady state approximation for <b>4c-f</b> ..                                                       | S7  |
| 1.4 Methods for kinetic studies.....                                                                                                                                                | S7  |
| <b>2. Cationic Polymerization of 2a,c and Characterization of Poly(vinyl ether)</b> .....                                                                                           | S8  |
| 2.1 Cationic polymerization of CH <sub>2</sub> =CHO <sup>t</sup> Bu ( <b>2a</b> ) by [Li(Et <sub>2</sub> O) <sub>2.8</sub> ][B(C <sub>6</sub> F <sub>5</sub> ) <sub>4</sub> ].....  | S8  |
| 2.2 Cationic polymerization of CH <sub>2</sub> =CHO <sup>t</sup> Bu ( <b>2a</b> ) by [Ph <sub>3</sub> C][B(C <sub>6</sub> F <sub>5</sub> ) <sub>4</sub> ].....                      | S9  |
| 2.3 Polymerization of CH <sub>2</sub> =CHOSiMe <sub>3</sub> ( <b>2c</b> ) by 1[B(C <sub>6</sub> F <sub>5</sub> ) <sub>4</sub> ].....                                                | S9  |
| 2.4 Attempted polymerization of CH <sub>2</sub> =CHOSiPh <sub>3</sub> ( <b>2f</b> ) by 1[B(C <sub>6</sub> F <sub>5</sub> ) <sub>4</sub> ].....                                      | S9  |
| 2.5 Attempted polymerization of CH <sub>2</sub> =CHOPh ( <b>2g</b> ) by 1[B(C <sub>6</sub> F <sub>5</sub> ) <sub>4</sub> ].....                                                     | S10 |
| 2.6 Cationic polymerization of CH <sub>2</sub> =CHOSiMe <sub>3</sub> ( <b>2c</b> ) by [Li(Et <sub>2</sub> O) <sub>2.8</sub> ][B(C <sub>6</sub> F <sub>5</sub> ) <sub>4</sub> ]..... | S10 |
| 2.7 Cationic polymerization of CH <sub>2</sub> =CHOSiMe <sub>3</sub> ( <b>2c</b> ) by [Ph <sub>3</sub> C][B(C <sub>6</sub> F <sub>5</sub> ) <sub>4</sub> ].....                     | S10 |
| 2.8 Key NMR data for -[CH <sub>2</sub> CH(OSiMe <sub>3</sub> )] <sub>n</sub> -.....                                                                                                 | S11 |
| <b>3. Generation of [(<math>\alpha</math>-diimine)PdMe(CH<sub>2</sub>=CHOR)][SbF<sub>6</sub>] (<b>3b-g</b>[SbF<sub>6</sub>]) Complexes from 1[SbF<sub>6</sub>]</b> .....            | S11 |

|                                                                                                                                                                                                           |     |
|-----------------------------------------------------------------------------------------------------------------------------------------------------------------------------------------------------------|-----|
| 3.1 Generation of $[(\alpha\text{-diimine})\text{PdMe}(\text{CH}_2=\text{CHOEt})][\text{SbF}_6]$ ( <b>3b</b> $[\text{SbF}_6]$ ).                                                                          | S11 |
| 3.2 $[(\alpha\text{-diimine})\text{PdMe}(\text{CH}_2=\text{CHOSiMe}_3)][\text{SbF}_6]$ ( <b>3c</b> $[\text{SbF}_6]$ ).                                                                                    | S12 |
| 3.3 $[(\alpha\text{-diimine})\text{PdMe}(\text{CH}_2=\text{CHOSiMe}_2\text{Ph})][\text{SbF}_6]$ ( <b>3d</b> $[\text{SbF}_6]$ ).                                                                           | S13 |
| 3.4 $[(\alpha\text{-diimine})\text{PdMe}(\text{CH}_2=\text{CHOSiMePh}_2)][\text{SbF}_6]$ ( <b>3e</b> $[\text{SbF}_6]$ ).                                                                                  | S13 |
| 3.5 $[(\alpha\text{-diimine})\text{PdMe}(\text{CH}_2=\text{CHOSiPh}_3)][\text{SbF}_6]$ ( <b>3f</b> $[\text{SbF}_6]$ ).                                                                                    | S14 |
| 3.6 $[(\alpha\text{-diimine})\text{PdMe}(\text{CH}_2=\text{CHOPh})][\text{SbF}_6]$ ( <b>3g</b> $[\text{SbF}_6]$ ).                                                                                        | S14 |
| 3.7 $[(2,6\text{-}^i\text{Pr}_2\text{-C}_6\text{H}_3)\text{N}=\text{CAnCAn}=\text{N}(2,6\text{-}^i\text{Pr}_2\text{-C}_6\text{H}_3)][\text{SbF}_6]$ ( <b>3h</b> $[\text{SbF}_6]$ ).                       | S15 |
| 3.8 $[\{(4\text{-Me-C}_6\text{H}_5)\text{N}=\text{CMeCMe}=\text{N}(4\text{-Me-C}_6\text{H}_5)\}\text{PdMe}(\text{CH}_2=\text{CHOSiPh}_3)][\text{SbF}_6]$ ( <b>3i</b> )<br>( <b>3i</b> $[\text{SbF}_6]$ ). | S16 |
| <b>4. Competitive Binding Studies</b>                                                                                                                                                                     | S19 |
| 4.1 Competitive binding of <b>2d-g</b> and <b>2c</b> to <b>1</b> $[\text{SbF}_6]$ at $-20\text{ }^\circ\text{C}$ (eq 5).                                                                                  | S19 |
| 4.2 Competitive binding of ethylene and $\text{CH}_2=\text{CHOR}$ ( <b>2a-c</b> , <b>2g</b> ) to <b>1</b> $[\text{B}(\text{C}_6\text{F}_5)_4]$ at $-60\text{ }^\circ\text{C}$ (eq 4).                     | S20 |
| <b>5. Reaction of <math>\text{CH}_2=\text{CHO}^t\text{Bu}</math> (<b>2a</b>) with <b>1</b><math>[\text{B}(\text{C}_6\text{F}_5)_4]</math>.</b>                                                            | S20 |
| 5.1 Kinetics of insertion of <b>3a</b> $[\text{B}(\text{C}_6\text{F}_5)_4]$ .                                                                                                                             | S20 |
| 5.2 Kinetics of the $\beta\text{-O}^t\text{Bu}$ elimination of <b>5a</b> $[\text{B}(\text{C}_6\text{F}_5)_4]$ and <b>4a</b> $[\text{B}(\text{C}_6\text{F}_5)_4]$ .                                        | S23 |
| <b>6. Reaction of <b>1</b><math>[\text{B}(\text{C}_6\text{F}_5)_4]</math> with <b>2b-g</b></b>                                                                                                            | S24 |
| 6.1 Reaction of <b>1</b> $[\text{B}(\text{C}_6\text{F}_5)_4]$ with $\text{CH}_2=\text{CHOEt}$ ( <b>2b</b> ).                                                                                              | S24 |
| 6.2 Reaction of <b>1</b> $[\text{B}(\text{C}_6\text{F}_5)_4]$ with $\text{CH}_2=\text{CHOSiMe}_3$ ( <b>2c</b> ).                                                                                          | S29 |
| 6.3 Reaction of <b>5c</b> $[\text{B}(\text{C}_6\text{F}_5)_4]$ with MeCN.                                                                                                                                 | S31 |
| 6.4 Reaction of <b>1</b> $[\text{B}(\text{C}_6\text{F}_5)_4]$ with $\text{CH}_2=\text{CHOSiMe}_2\text{Ph}$ ( <b>2d</b> ).                                                                                 | S32 |
| 6.5 Reaction of <b>1</b> $[\text{B}(\text{C}_6\text{F}_5)_4]$ with $\text{CH}_2=\text{CHOSiMePh}_2$ ( <b>2e</b> ).                                                                                        | S33 |
| 6.6 Reaction of <b>1</b> $[\text{B}(\text{C}_6\text{F}_5)_4]$ with $\text{CH}_2=\text{CHOSiPh}_3$ ( <b>2f</b> ).                                                                                          | S35 |
| 6.7 Reaction of <b>5f</b> $[\text{B}(\text{C}_6\text{F}_5)_4]$ with MeCN.                                                                                                                                 | S37 |
| 6.8 Reaction of <b>1</b> $[\text{B}(\text{C}_6\text{F}_5)_4]$ with $\text{CH}_2=\text{CHOPh}$ ( <b>2g</b> ).                                                                                              | S38 |
| <b>7. Reaction of <b>1</b><math>[\text{SbF}_6]</math> with <b>2a-g</b>.</b>                                                                                                                               | S38 |
| 7.1 Reaction of <b>1</b> $[\text{SbF}_6]$ with $\text{CH}_2=\text{CHO}^t\text{Bu}$ ( <b>2a</b> ).                                                                                                         | S38 |
| 7.2 Reaction of <b>1</b> $[\text{SbF}_6]$ with $\text{CH}_2=\text{CHOEt}$ ( <b>2b</b> ).                                                                                                                  | S42 |

|                                                                                                                                                                                                                                                                                                                         |      |
|-------------------------------------------------------------------------------------------------------------------------------------------------------------------------------------------------------------------------------------------------------------------------------------------------------------------------|------|
| 7.3 Simulation of the concentration data for the reaction of <b>1</b> [SbF <sub>6</sub> ] with <b>2b</b> .....                                                                                                                                                                                                          | S46  |
| 7.4 Reaction of <b>1</b> [SbF <sub>6</sub> ] with CH <sub>2</sub> =CHOSiMe <sub>3</sub> ( <b>2c</b> ). ....                                                                                                                                                                                                             | S48  |
| 7.5 Reaction of <b>1</b> [SbF <sub>6</sub> ] with CH <sub>2</sub> =CHOSiMe <sub>2</sub> Ph ( <b>2d</b> ).....                                                                                                                                                                                                           | S50  |
| 7.6 Reaction of <b>1</b> [SbF <sub>6</sub> ] with CH <sub>2</sub> =CHOSiMePh <sub>2</sub> ( <b>2e</b> ). ....                                                                                                                                                                                                           | S53  |
| 7.7 Reaction of <b>1</b> [SbF <sub>6</sub> ] with CH <sub>2</sub> =CHOSiPh <sub>3</sub> ( <b>2f</b> ). ....                                                                                                                                                                                                             | S56  |
| 7.8 Insertion of [( $\alpha$ -diimine)PdMe(CH <sub>2</sub> =CHOPh)][SbF <sub>6</sub> ] ( <b>3g</b> [SbF <sub>6</sub> ]). ....                                                                                                                                                                                           | S58  |
| 7.9 Construction of the energy diagram for competitive binding of vinyl ethers and insertion of <b>3a-g</b> (Figure 1 in manuscript). ....                                                                                                                                                                              | S60  |
| 7.10 Insertion of [(2,6- <sup>i</sup> Pr <sub>2</sub> -C <sub>6</sub> H <sub>3</sub> )N=C(An)-C(An)=N(2,6- <sup>i</sup> Pr <sub>2</sub> -C <sub>6</sub> H <sub>3</sub> )}PdMe(CH <sub>2</sub> =CHOSiPh <sub>3</sub> )] [SbF <sub>6</sub> ] ( <b>3h</b> ) and $\beta$ -OSiPh <sub>3</sub> elimination of <b>5h</b> ..... | S61  |
| 7.11 Insertion of [(4-Me-C <sub>6</sub> H <sub>5</sub> )N=CMeCMe=N(4-Me-C <sub>6</sub> H <sub>5</sub> )}PdMe(CH <sub>2</sub> =CHOSiPh <sub>3</sub> )] [SbF <sub>6</sub> ] ( <b>3i</b> ). ....                                                                                                                           | S64  |
| <b>8. X-Ray Crystallography</b> . ....                                                                                                                                                                                                                                                                                  | S65  |
| 8.1 [( $\alpha$ -diimine)Pd( $\eta^3$ -C <sub>3</sub> H <sub>5</sub> )] [B(C <sub>6</sub> F <sub>5</sub> ) <sub>4</sub> ] (6[B(C <sub>6</sub> F <sub>5</sub> ) <sub>4</sub> ]). ....                                                                                                                                    | S65  |
| <b>9. DFT Calculations</b> . ....                                                                                                                                                                                                                                                                                       | S66  |
| 9.1 DFT studies of the structure of <b>4a</b> and <b>5a</b> .....                                                                                                                                                                                                                                                       | S66  |
| 9.2 DFT studies of the structure of <b>4c</b> and <b>5c</b> . ....                                                                                                                                                                                                                                                      | S67  |
| <b>10. NMR Spectra for Cationic Polymers and Kinetics Studies</b> . ....                                                                                                                                                                                                                                                | S68  |
| 10.1 Spectra of -[CH <sub>2</sub> CH(O <sup>t</sup> Bu)] <sub>n</sub> - homopolymer.....                                                                                                                                                                                                                                | S68  |
| 10.2 Spectra of -[CH <sub>2</sub> CH(OSiMe <sub>3</sub> )] <sub>n</sub> - homopolymer and attempted polymerization of CH <sub>2</sub> =CHOSiPh <sub>3</sub> and CH <sub>2</sub> =CHOPh. ....                                                                                                                            | S71  |
| 10.3 Selected <sup>1</sup> H NMR spectra for CH <sub>2</sub> =CHO <sup>t</sup> Bu case:.....                                                                                                                                                                                                                            | S75  |
| 10.4 Selected <sup>1</sup> H NMR spectra for CH <sub>2</sub> =CHOEt case:.....                                                                                                                                                                                                                                          | S83  |
| 10.5 Selected <sup>1</sup> H NMR spectra for CH <sub>2</sub> =CHOSiMe <sub>3</sub> case: ....                                                                                                                                                                                                                           | S91  |
| 10.6 Selected <sup>1</sup> H NMR spectra for CH <sub>2</sub> =CHSiMe <sub>2</sub> Ph case.....                                                                                                                                                                                                                          | S97  |
| 10.7 Selected <sup>1</sup> H NMR spectra for CH <sub>2</sub> =CHSiMe <sub>2</sub> Ph case.....                                                                                                                                                                                                                          | S103 |
| 10.8 Selected <sup>1</sup> H NMR spectra for CH <sub>2</sub> =CHSiPh <sub>3</sub> case: ....                                                                                                                                                                                                                            | S109 |
| <b>11. References</b> .....                                                                                                                                                                                                                                                                                             | S115 |

## 1. Materials and Methods

### 1.1 NMR characterization of some known compounds.

Data for ( $\alpha$ -diimine)PdMeCl:  $^1\text{H}$  NMR ( $\text{CD}_2\text{Cl}_2$ , 20  $^\circ\text{C}$ )  $\delta$  7.34-7.11 (m, 6H), 3.07 (sept,  $J = 7$ , 2H,  $\text{CHMe}_2$ ), 3.01 (sept,  $J = 7$ , 2H,  $\text{CHMe}_2$ ), 2.04 (s, 3H,  $\text{N}=\text{CMe}$ ), 2.03 (s, 3H,  $\text{N}=\text{CMe}$ ), 1.40 (d,  $J = 7$ , 6H,  $\text{CHMe}_2$ ), 1.36 (d,  $J = 7$ , 6H,  $\text{CHMe}_2$ ), 1.19 (d,  $J = 7$ , 6H,  $\text{CHMe}_2$ ), 1.17 (d,  $J = 7$ , 6H,  $\text{CHMe}_2$ ), 0.37 (s, 3H,  $\text{PdMe}$ ).

Data for  $[(\alpha\text{-diimine})\text{PdMe}(\text{OEt}_2)][\text{SbF}_6]$ :  $^1\text{H}$  NMR ( $\text{CD}_3\text{CN}$ , 20  $^\circ\text{C}$ )  $\delta$  7.37-7.34 (m, 6H), 3.04 (sept,  $J = 7$ , 2H,  $\text{CHMe}_2$ ), 2.99 (sept,  $J = 7$ , 2H,  $\text{CHMe}_2$ ), 2.22 (s, 3H,  $\text{N}=\text{CMe}$ ), 2.21 (s, 3H,  $\text{N}=\text{CMe}$ ), 1.36 (d,  $J = 7$ , 6H,  $\text{CHMe}_2$ ), 1.29 (d,  $J = 7$ , 6H,  $\text{CHMe}_2$ ), 1.25 (d,  $J = 7$ , 6H,  $\text{CHMe}_2$ ), 1.21 (d,  $J = 7$ , 6H,  $\text{CHMe}_2$ ), 0.31 (s, 3H,  $\text{PdMe}$ ).  $^{13}\text{C}\{^1\text{H}\}$  NMR ( $\text{CD}_3\text{CN}$ , 20  $^\circ\text{C}$ ):  $\delta$  183.0 ( $\text{N}=\text{CMe}$ ), 175.0 ( $\text{N}=\text{CMe}$ ), 141.5, 141.3, 139.7, 138.9, 129.4, 128.6, 125.2, 124.9, 29.4, 29.1, 24.1, 23.8, 23.7, 23.2, 21.9, 20.3, 4.7 ( $\text{PdMe}$ ).  $^1\text{H}$  NMR ( $\text{CD}_2\text{Cl}_2$ , -20  $^\circ\text{C}$ )  $\delta$  7.31-7.21 (m, 6H), 3.00 (sept,  $J = 7$ , 2H,  $\text{CHMe}_2$ ), 2.93 (sept,  $J = 7$ , 2H,  $\text{CHMe}_2$ ), 2.03 (b, 6H,  $\text{N}=\text{CMe}$ ), 1.34 (d,  $J = 7$ , 6H,  $\text{CHMe}_2$ ), 1.30 (d,  $J = 7$ , 6H,  $\text{CHMe}_2$ ), 1.13 (d,  $J = 7$ , 12H,  $\text{CHMe}_2$ ), 0.26 (s, 3H,  $\text{PdMe}$ ).

Data for ( $\text{tmeda}$ )Pd(OPh) $_2$ :  $^1\text{H}$  NMR ( $\text{CD}_2\text{Cl}_2$ , 20  $^\circ\text{C}$ )  $\delta$  7.12 (d,  $J = 8$ , 4H,  $\text{H}_{\text{ortho}}$ ), 6.96 (t,  $J = 7$ , 4H,  $\text{H}_{\text{meta}}$ ), 6.43 (t,  $J = 7$ , 2H,  $\text{H}_{\text{para}}$ ), 2.58 (s, 12H,  $\text{NMe}_2$ ), 2.55 (s, 4H,  $-\text{CH}_2-$ ).  $^{13}\text{C}\{^1\text{H}\}$  NMR ( $\text{CD}_2\text{Cl}_2$ , 20  $^\circ\text{C}$ )  $\delta$  168.3 ( $\text{C}_{\text{ipso}}$ ), 127.9, 118.8, 113.7, 62.3 ( $-\text{CH}_2-$ ), 50.6 ( $\text{NMe}_2$ ).

Data for KOPh:  $^1\text{H}$  NMR ( $\text{THF-}d_8$ , 20  $^\circ\text{C}$ )  $\delta$  6.81 (t,  $J = 8$ , 2H,  $\text{H}_{\text{meta}}$ ), 6.28 (d,  $J = 8$ , 2H,  $\text{H}_{\text{ortho}}$ ), 6.03 (t,  $J = 7$ , 1H,  $\text{H}_{\text{para}}$ ).

Data for  $\text{CH}_2=\text{CHO}^t\text{Bu}$ :  $^1\text{H}$  NMR ( $\text{CD}_2\text{Cl}_2$ , 20 °C)  $\delta$  6.48 (dd,  $J = 14, 6$ ; 1H,  $\text{H}_{\text{int}}$ ), 4.30 (d,  $J = 14$ , 1H,  $\text{H}_{\text{trans}}$ ), 3.97 (d,  $J = 6$ , 1H,  $\text{H}_{\text{cis}}$ ), 1.26 (s, 9H,  $\text{OCMe}_3$ ).  $^{13}\text{C}\{^1\text{H}\}$  NMR ( $\text{CD}_2\text{Cl}_2$ , 20 °C)  $\delta$  147.1 ( $\text{CH}_2=\text{CH}$ ), 90.4 ( $\text{CH}_2=\text{CH}$ ), 76.4 ( $\text{OCMe}_3$ ), 28.3 ( $\text{OCMe}_3$ ).

Data for  $\text{CH}_2=\text{CHOEt}$ :  $^1\text{H}$  NMR data ( $\text{CD}_2\text{Cl}_2$ , 20 °C):  $\delta$  6.46 (dd, 1H,  $\text{H}_{\text{int}}$ ), 4.15 (d, 1H,  $\text{H}_{\text{trans}}$ ), 3.96 (d, 1H,  $\text{H}_{\text{cis}}$ ), 3.73 (q, 2H,  $\text{OCH}_2\text{CH}_3$ ), 1.16 (t, 1H,  $\text{OCH}_2\text{CH}_3$ ).  $^{13}\text{C}\{^1\text{H}\}$  NMR ( $\text{CD}_2\text{Cl}_2$ , 20 °C):  $\delta$  152.4 ( $\text{CH}_2=\text{CH}$ ), 86.5.4 ( $\text{CH}_2=\text{CH}$ ), 64.2 ( $\text{OCH}_2\text{CH}_3$ ), 14.9 ( $\text{OCH}_2\text{CH}_3$ ).

Data for  $\text{CH}_2=\text{CHOSiMe}_3$ :  $^1\text{H}$  NMR ( $\text{CD}_2\text{Cl}_2$ , 20 °C):  $\delta$  6.41 (dd,  $J = 13, 6$ ; 1H,  $\text{H}_{\text{int}}$ ), 4.38 (d,  $J = 13$ , 1H,  $\text{H}_{\text{trans}}$ ), 4.11 (d,  $J = 6$ , 1H,  $\text{H}_{\text{cis}}$ ), 0.19 (s, 9H,  $\text{OSiMe}_3$ ).  $^{13}\text{C}\{^1\text{H}\}$  NMR ( $\text{CD}_2\text{Cl}_2$ , 20 °C):  $\delta$  146.4 ( $\text{CH}_2=\text{CH}$ ), 94.6 ( $\text{CH}_2=\text{CH}$ ), -0.45 ( $\text{OSiMe}_3$ ).

Data for  $\text{CH}_2=\text{CHOSiMe}_2\text{Ph}$ :  $^1\text{H}$  NMR ( $\text{CD}_2\text{Cl}_2$ , 20 °C):  $\delta$  7.68 (d,  $J = 8$ , 6H,  $\text{H}_{\text{ortho}}$ ), 7.48 (t,  $J = 7$ , 3H,  $\text{H}_{\text{para}}$ ), 7.45 (t,  $J = 7$ , 6H,  $\text{H}_{\text{meta}}$ ), 6.49 (dd,  $J = 14, 6$ ; 1H,  $\text{H}_{\text{int}}$ ), 4.72 (d,  $J = 14$ , 1H,  $\text{H}_{\text{trans}}$ ), 4.21 (d,  $J = 6$ , 1H,  $\text{H}_{\text{cis}}$ ), 0.53 (s, 6H,  $\text{SiCH}_3$ ).  $^{13}\text{C}$  NMR ( $\text{CD}_2\text{Cl}_2$ , 20 °C):  $\delta$  146.6 ( $=\text{CH}$ ), 137.3 ( $\text{C}_{\text{ipso}}$ ), 134.1, 130.6, 128.6, 95.5 ( $=\text{CH}_2$ ), -1.4 ( $\text{SiCH}_3$ ).

Data for  $\text{CH}_2=\text{CHOSiMePh}_2$ :  $^1\text{H}$  NMR ( $\text{CD}_2\text{Cl}_2$ , 20 °C):  $\delta$  7.55 (d,  $J = 8$ , 6H,  $\text{H}_{\text{ortho}}$ ), 7.37 (t,  $J = 7$ , 3H,  $\text{H}_{\text{para}}$ ), 7.33 (t,  $J = 7$ , 6H,  $\text{H}_{\text{meta}}$ ), 6.63 (dd,  $J = 14, 6$  Hz, 1 H,  $=\text{CH}$ ), 4.69 (dd,  $J = 14, 1$  Hz, 1 H,  $=\text{CH}_2$ ), 4.32 (dd,  $J = 6, 1$  Hz, 1 H,  $=\text{CH}_2$ ), 0.87 (s, 3 H,  $\text{SiCH}_3$ ).  $^{13}\text{C}$  NMR ( $\text{CD}_2\text{Cl}_2$ , 20 °C):  $\delta$  146.7 ( $=\text{CH}$ ), 135.6 ( $\text{C}_{\text{ipso}}$ ), 135.0, 130.9, 128.7, 96.0 ( $=\text{CH}_2$ ), -2.6 ( $\text{SiCH}_3$ ).

Data for  $\text{CH}_2=\text{CHOSiPh}_3$ :  $^1\text{H}$  NMR ( $\text{CD}_2\text{Cl}_2$ )  $\delta$  7.67 (d,  $J = 8$ , 6H,  $\text{H}_{\text{ortho}}$ ), 7.49 (t,  $J = 7$ , 3H,  $\text{H}_{\text{para}}$ ), 7.43 (t,  $J = 7$ , 6H,  $\text{H}_{\text{meta}}$ ), 6.65 (dd,  $J = 14, 6$ ; 1H,  $\text{H}_{\text{int}}$ ), 4.65 (d,  $J = 14$ , 1H,  $\text{H}_{\text{trans}}$ ), 4.22 (d,  $J = 6$ , 1H,  $\text{H}_{\text{cis}}$ ).  $^{13}\text{C}$  NMR ( $\text{CD}_2\text{Cl}_2$ )  $\delta$  146.6 ( $=\text{CH}$ ), 135.9, 133.5 ( $\text{C}_{\text{ipso}}$ ), 131.0, 128.6, 96.1 ( $\text{CH}_2=$ ). GC-MS:  $m/z = 302$ .

Data for CH<sub>2</sub>=CHOPh: <sup>1</sup>H NMR (CD<sub>2</sub>Cl<sub>2</sub>): δ 7.34 (t, *J* = 7, 2H, H<sub>meta</sub>), 7.08 (t, *J* = 7, 1H, H<sub>para</sub>), 7.00 (d, *J* = 8, 2H, H<sub>ortho</sub>), 6.67 (dd, *J* = 14, 6; 1H, H<sub>int</sub>), 4.75 (d, *J* = 15, 1H, H<sub>trans</sub>), 4.43 (d, *J* = 6, 1H, H<sub>cis</sub>). GC-MS: *m/z* = 120.

## 1.2 Derivation of eq 7 of the manuscript and estimation of limits for *k*<sub>β-OR</sub> for **5c-f**.

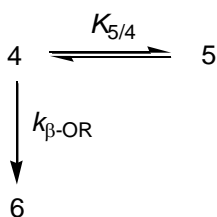

$$K_{5/4} = [5]/[4]$$

$$[5] = K_{5/4} \cdot [4]$$

$$[4] + [5] = (K_{5/4} + 1)[4]$$

$$d([6])/dt = k_{\beta\text{-OR,obs}} ([4] + [5])$$

$$\implies d([6])/dt = k_{\beta\text{-OR,obs}} (K_{5/4} + 1)[4] \quad (\text{i})$$

$$d([6])/dt = k_{\beta\text{-OR}}[4] \quad (\text{ii})$$

$$\text{from eq i and eq ii} \implies k_{\beta\text{-OR,obs}} (K_{5/4} + 1)[4] = k_{\beta\text{-OR}}[4]$$

$$\implies k_{\beta\text{-OR}} = k_{\beta\text{-OR,obs}} (K_{5/4} + 1) \quad (7)$$

Estimation of limits for *k*<sub>β-OR</sub> for **5c-f** based on pre-equilibrium assumption:

since *K*<sub>5c/4c</sub> > 19, from eq 7

$$\implies k_{\beta\text{-OR}} > 20 k_{\beta\text{-OR,obs}}$$

### 1.3 Estimation of limits for $k_{\beta\text{-OR}}$ for 5c-f based on the steady state approximation for 4c-f.

$$d([4])/dt = k_{5 \rightarrow 4}[5] - k_{4 \rightarrow 5}[4] - k_{\beta\text{-OR}}[4] = 0$$

$$[4] = k_{5 \rightarrow 4}[5]/(k_{4 \rightarrow 5} + k_{\beta\text{-OR}}) \quad (\text{iii})$$

$$d([6])/dt = k_{\beta\text{-OR,obs}}[5] \quad (\text{iv})$$

$$d([6])/dt = k_{\beta\text{-OR}}[4] \quad (\text{v})$$

$$\text{from (iv) and (v): } k_{\beta\text{-OR,obs}}[5] = k_{\beta\text{-OR}}[4]$$

$$\implies [4] = (k_{\beta\text{-OR,obs}}[5])/k_{\beta\text{-OR}} \quad (\text{vi})$$

$$\text{from (iii) and (vi): } k_{5 \rightarrow 4}[5]/(k_{4 \rightarrow 5} + k_{\beta\text{-OR}}) = (k_{\beta\text{-OR,obs}}[5])/k_{\beta\text{-OR}}$$

$$\implies k_{\beta\text{-OR}} = k_{\beta\text{-OR,obs}} k_{4 \rightarrow 5} / (k_{5 \rightarrow 4} - k_{\beta\text{-OR,obs}})$$

$$k_{\beta\text{-OR}} > k_{\beta\text{-OR,obs}} k_{4 \rightarrow 5} / k_{5 \rightarrow 4}$$

$$k_{\beta\text{-OR}} > k_{\beta\text{-OR,obs}} K_{5/4}$$

$$k_{\beta\text{-OR}} > 19 k_{\beta\text{-OR,obs}} \quad (8)$$

**1.4 Methods for kinetic studies.** For all cases, the kinetics of both the decrease of the reactants and the increase of the products were measured, and found to be in good agreement.

The kinetics of the decrease of the reactants was analyzed according to the following equations:

$$\ln([A]/[A]_0) = kt$$

$$[A]/[A]_0 = I_{\text{normalized}}/I_{0, \text{normalized}}$$

$$I_{\text{normalized}} = I^*/I_{\text{std}}$$

$$I_{0, \text{normalized}} = I_0/I_{\text{std}}$$

$I^*$  is the intensity of the peak of interest, for example, the  $\text{PdMe}$  resonance for insertion studies and the  $\text{PdCMe}_2$  resonance for  $\beta\text{-OR}$  elimination studies. In some cases the integration of the  $\text{OCH}_2\text{CH}_3$  resonance of  $\text{OEt}_2$  was used as  $I_{\text{std}}$ . If peaks from other species overlapped

with the  $\text{OCH}_2\text{CH}_3$  resonance we used the whole aromatic region as  $I_{\text{std}}$ . For the reaction of **1**[SbF<sub>6</sub>] with **2f**, we analyzed the results by using both  $\text{OCH}_2\text{CH}_3$  resonance from OEt<sub>2</sub> and the whole aromatic region as  $I_{\text{std}}$ , which gave the same results.

The kinetics of the increase of the products was analyzed according to the following equations:

$$\ln[(\text{[B]}_{\infty}-\text{[B]})/(\text{[B]}_{\infty}-\text{[B]}_0)] = kt$$

$$(\text{[B]}_{\infty}-\text{[B]})/(\text{[B]}_{\infty}-\text{[B]}_0) = (I_{\infty, \text{normalized}} - I^*)/(I_{\infty, \text{normalized}} - I_{0, \text{normalized}})$$

$$I_{\text{normalized}} = I^*/I_{\text{std}}$$

$$I_{0, \text{normalized}} = I_0/I_{\text{std}}$$

$I^*$  is the intensity of the peak of interest, for example, the  $\text{PdCMe}_2$  and  $\text{PdCH}_2\text{CH}(\text{OEt})\text{Me}$  resonances for insertion studies and the  $\text{Pd}(\eta^3\text{-CH}_2\text{CHCH}_2)$  resonance for  $\beta$ -OR elimination studies. Specifically, for the case of  $\text{CH}_2=\text{CHOEt}$  and  $\text{CH}_2=\text{CHOPh}$ , in which the  $\beta$ -OR elimination rate is comparable with the insertion rate, we used the sum of  $\text{PdCMe}_2$ ,  $\text{PdCH}_2\text{CH}(\text{OEt})\text{Me}$  and  $\text{Pd}(\eta^3\text{-CH}_2\text{CHCH}_2)$  resonances as the  $I^*$  for insertion kinetics. Kinetic data and plots are shown in Sections 5, 6 and 7; representative NMR spectra from kinetic studies are shown in Section 10.

## 2. Cationic Polymerization of **2a,c** and Characterization of Poly(vinyl ether).

**2.1 Cationic polymerization of  $\text{CH}_2=\text{CHO}^t\text{Bu}$  (**2a**) by  $[\text{Li}(\text{Et}_2\text{O})_{2.8}][\text{B}(\text{C}_6\text{F}_5)_4]$ .** An NMR tube was charged with  $[\text{Li}(\text{Et}_2\text{O})_{2.8}][\text{B}(\text{C}_6\text{F}_5)_4]$  (22.7 mg, 0.0254 mmol).  $\text{CD}_2\text{Cl}_2$  (0.4 mL) was added by vacuum transfer at  $-196\text{ }^\circ\text{C}$ . The tube was warmed to  $20\text{ }^\circ\text{C}$  and shaken. **2a** (1.25 mmol) was added by vacuum transfer at  $-196\text{ }^\circ\text{C}$ . The tube was warmed to  $20\text{ }^\circ\text{C}$ , shaken vigorously, and monitored periodically by NMR.  $^1\text{H}$  NMR spectra showed that **2a** was



quantitatively converted to polymer after 20 h. 2,6-di-tert-butylpyridine significantly retards the polymerization of **2a** by  $[\text{Li}(\text{Et}_2\text{O})_{2.8}][\text{B}(\text{C}_6\text{F}_5)_4]$ .

**2.2 Cationic polymerization of  $\text{CH}_2=\text{CHO}^t\text{Bu}$  (**2a**) by  $[\text{Ph}_3\text{C}][\text{B}(\text{C}_6\text{F}_5)_4]$ .** An NMR tube was charged with  $[\text{Ph}_3\text{C}][\text{B}(\text{C}_6\text{F}_5)_4]$  (24.5 mg, 0.0266 mmol).  $\text{CDCl}_3$  (0.4 mL) was added by vacuum transfer at  $-196^\circ\text{C}$ . The tube was warmed to  $20^\circ\text{C}$  and shaken. **2a** (1.25 mmol) was added by vacuum transfer at  $-196^\circ\text{C}$ . The tube was warmed to  $20^\circ\text{C}$ , shaken vigorously, and monitored periodically by NMR.  $^1\text{H}$  NMR spectra showed that **2a** was quantitatively converted to polymer after 20 h.

**2.3 Polymerization of  $\text{CH}_2=\text{CHOSiMe}_3$  (**2c**) by  $1[\text{B}(\text{C}_6\text{F}_5)_4]$ .** A Schlenk flask was charged with ( $\alpha$ -diimine) $\text{PdMeCl}$  (11.4 mg, 0.0203 mmol) and  $[\text{Li}(\text{Et}_2\text{O})_{2.8}][\text{B}(\text{C}_6\text{F}_5)_4]$  (17.6 mg, 0.0197 mmol).  $\text{CH}_2\text{Cl}_2$  (1 mL) was added by syringe. The mixture was stirred vigorously at  $20^\circ\text{C}$  for 10 min. A solution of **2c** (400 mg, 3.33 mmol) in  $\text{CH}_2\text{Cl}_2$  (9 mL) was added by cannula. The mixture became dark within 10 min, indicating the formation of  $\text{Pd}^0$ . After 20 h, the volatiles were removed under vacuum, affording dark oil. NMR analysis showed that the oil contained poly(trimethylsilyl vinyl ether) ( $-\text{[CH}_2\text{CH(OSiMe}_3\text{)]}_n-$ ), free  $\alpha$ -diimine and other unidentified species. Approximately 7 % of **2c** was converted to polymer. 2,6-di-tert-butylpyridine does not significantly affect the polymerization of **2c** by  $1[\text{B}(\text{C}_6\text{F}_5)_4]$ .

**2.4 Attempted polymerization of  $\text{CH}_2=\text{CHOSiPh}_3$  by  $1[\text{B}(\text{C}_6\text{F}_5)_4]$ .** An NMR tube was charged with ( $\alpha$ -diimine) $\text{PdMeCl}$  (5.5 mg, 0.010 mmol),  $[\text{Li}(\text{Et}_2\text{O})_{2.8}][\text{B}(\text{C}_6\text{F}_5)_4]$  (8.3 mg, 0.0093 mmol) and  $\text{CH}_2=\text{CHOSiPh}_3$  (176 mg, 0.582 mmol).  $\text{CD}_2\text{Cl}_2$  (0.4 mL) was added

by vacuum transfer at -196 °C. The tube was warmed to 20 °C, shaken and monitored by  $^1\text{H}$  NMR periodically. NMR spectra showed that no polymer had formed after 20 h.

**2.5 Attempted polymerization of  $\text{CH}_2=\text{CHOPh}$  by  $1[\text{B}(\text{C}_6\text{F}_5)_4]$ .** An NMR tube was charged with ( $\alpha$ -diimine) $\text{PdMeCl}$  (8.4 mg, 0.015 mmol),  $[\text{Li}(\text{Et}_2\text{O})_{2.8}][\text{B}(\text{C}_6\text{F}_5)_4]$  (13.4 mg, 0.0150 mmol) and  $\text{CH}_2=\text{CHOPh}$  (33 mg, 0.27 mmol).  $\text{CD}_2\text{Cl}_2$  (0.4 mL) was added by vacuum transfer at -196 °C. The tube was warmed to 20 °C, shaken, and monitored by  $^1\text{H}$  NMR periodically. NMR spectra showed that no polymer had formed after 20 h.

**2.6 Cationic polymerization of  $\text{CH}_2=\text{CHOSiMe}_3$  (**2c**) by  $[\text{Li}(\text{Et}_2\text{O})_{2.8}][\text{B}(\text{C}_6\text{F}_5)_4]$ .** A Schlenk flask was charged with  $[\text{Li}(\text{Et}_2\text{O})_{2.8}][\text{B}(\text{C}_6\text{F}_5)_4]$  (17.8 mg, 0.0199 mmol). A solution of **2c** (320 mg, 2.67 mmol) in  $\text{CH}_2\text{Cl}_2$  (10 mL) was added by cannula and the mixture was stirred vigorously at 20 °C. After 20 h, the volatiles were removed under vacuum. The nonvolatile oily residue was dried under vacuum to yield a white oil (120 mg), which was identified as poly(trimethylsilyl vinyl ether) ( $-\text{[CH}_2\text{CH(OSiMe}_3\text{)]}_n-$ ) by NMR.

**2.7 Cationic polymerization of  $\text{CH}_2=\text{CHOSiMe}_3$  (**2c**) by  $[\text{Ph}_3\text{C}][\text{B}(\text{C}_6\text{F}_5)_4]$ .** A flask was charged with  $[\text{Ph}_3\text{C}][\text{B}(\text{C}_6\text{F}_5)_4]$  (24.4 mg, 0.0265 mmol) and cooled to -196 °C. Chlorobenzene (1.2 mL) was added by vacuum transfer. The mixture was warmed to 23 °C. A Schlenk tube was charged with chlorobenzene or toluene (1.2 mL) and cooled to -196 °C. **2c** (1.50 mL, 1.17 g, 375 equiv) was added by vacuum transfer. The Schlenk tube was warmed to -40 °C with a dry ice/acetonitrile bath. The catalyst solution (at 23 °C) was transferred by cannula to the Schlenk tube. The mixture was stirred for 2 h at -40 °C and then quenched with methanol (1 mL) pre-cooled to -40 °C. Immediate gellation occurred upon the addition of

methanol. The mixture was transferred to a flask containing methanol (75 mL) and the mixture was stirred for 7.5 h. The white solid precipitate was collected by filtration, washed with methanol, dried under vacuum, and identified as poly(vinyl alcohol).<sup>1</sup> For reaction in chlorobenzene: yield 339 mg (76%),  $M_n$  4000. For reaction in toluene: yield 429 mg (97 %),  $M_n$  7000.

**2.8 Key NMR data for  $[-CH_2CH(OSiMe_3)]_n$ .**  $^1H$  NMR ( $CDCl_3$ ):  $\delta$  9.72 (m,  $-CH_2CH(OSiMe_3)CH_2C(=O)H$ ), 5.52 ( $-CH_2CH(OSiMe_3)CH=CHCH_2-$ ), 5.42 ( $-CH_2CH(OSiMe_3)CH=CHCH_2-$ ), 3.84 (br,  $-CH_2CH(OSiMe_3)-$ ), 1.57 (br,  $-CH_2CH(OSiMe_3)-$ ), 0.10 (br,  $-CH_2CH(OSiMe_3)-$ ).  $^{13}C\{^1H\}$  NMR ( $CDCl_3$ ):  $\delta$  70.8 (br,  $-CH_2CH(OSiMe_3)-$ ), 69.4 (br,  $-CH_2CH(OSiMe_3)-$ ), 65.7 (br,  $-CH_2CH(OSiMe_3)-$ ), 65.4 (br,  $-CH_2CH(OSiMe_3)-$ ), 46.6 (br,  $-CH_2CH(OSiMe_3)-$ ), 1.0 (br,  $-CH_2CH(OSiMe_3)-$ ).

### 3. Generation of $[(\alpha\text{-diimine})PdMe(CH_2=CHOR)][SbF_6]$ (**3b-g** $[SbF_6]$ ) Complexes from **1** $[SbF_6]$ .

The adducts  $[(\alpha\text{-diimine})PdMe(CH_2=CHOEt)][SbF_6]$  (**3b** $[SbF_6]$ ),  $[(\alpha\text{-diimine})PdMe(CH_2=CHOSiMe_3)][SbF_6]$  (**3c** $[SbF_6]$ ),  $[(\alpha\text{-diimine})PdMe(CH_2=CHOSiMe_2Ph)][SbF_6]$  (**3d** $[SbF_6]$ ),  $[(\alpha\text{-diimine})PdMe(CH_2=CHOSiMePh_2)][SbF_6]$  (**3e** $[SbF_6]$ ),  $[(\alpha\text{-diimine})PdMe(CH_2=CHOSiPh_3)][SbF_6]$  (**3f** $[SbF_6]$ ) and  $[(\alpha\text{-diimine})PdMe(CH_2=CHOPh)][SbF_6]$  (**3g** $[SbF_6]$ ) were generated using the procedure described for **3a** $[SbF_6]$  on similar scales and with similar yields.

**3.1 Generation of  $[(\alpha\text{-diimine})PdMe(CH_2=CHOEt)][SbF_6]$  (**3b** $[SbF_6]$ ).** An NMR tube was charged with **1** $[SbF_6]$  (13.0 mg, 0.0157 mmol) and  $CD_2Cl_2$  (0.4 mL) was added by vacuum transfer at  $-196^\circ C$ . **2b** (0.0173 mmol) was added by vacuum transfer at  $-196^\circ C$ . The

tube was warmed to -78 °C, shaken to dissolve and thoroughly mix the components, and placed in an NMR probe that had been pre-cooled to -20 °C. NMR spectra at -60 °C showed that **3b**[SbF<sub>6</sub>] (95 %) had formed. <sup>1</sup>H NMR (CD<sub>2</sub>Cl<sub>2</sub>, -20 °C): δ 7.37-7.32 (m, 6H), 6.76 (dd, *J* = 13, 4; 1H, H<sub>int</sub>), 4.04 (dq, *J* = 17, 8, 2H, OCH<sub>2</sub>CH<sub>3</sub>), 3.26 (d, *J* = 13, 1H, H<sub>trans</sub>), 3.11 (d, *J* = 4, 1H, H<sub>cis</sub>), 3.00 (sept, *J* = 7, 1H, CHMe<sub>2</sub>), 2.85 (sept, *J* = 7, 1H, CHMe<sub>2</sub>), 2.81 (sept, *J* = 7, 1H, CHMe<sub>2</sub>), 2.73 (sept, *J* = 7, 1H, CHMe<sub>2</sub>), 2.33 (s, 3H, N=CMe), 2.25 (s, 3H, N=CMe), 1.41 (d, *J* = 7, 3H, CHMe<sub>2</sub>), 1.37 (d, *J* = 7, 3H, CHMe<sub>2</sub>), 1.32 (d, *J* = 7, 3H, CHMe<sub>2</sub>), 1.29 (d, *J* = 7, 3H, CHMe<sub>2</sub>), 1.28 (d, *J* = 7, 3H, CHMe<sub>2</sub>), 1.19 (t, *J* = 7, 3H, OCH<sub>2</sub>CH<sub>3</sub>), 1.15 (d, *J* = 7, 3H, CHMe<sub>2</sub>), 1.13 (d, *J* = 7, 3H, CHMe<sub>2</sub>), 1.08 (free Et<sub>2</sub>O and CHMe<sub>2</sub>), 0.18 (s, 3H, PdMe). <sup>13</sup>C{<sup>1</sup>H} NMR (CD<sub>2</sub>Cl<sub>2</sub>, -20 °C): δ 179.8 (N=CMe), 175.7 (N=CMe), 148.4 (CH<sub>2</sub>=CHOEt), 139.8, 139.4, 138.3, 138.2, 138.1, 137.4, 128.65, 128.60, 125.2, 125.0, 124.7, 124.5, 71.8 (OCH<sub>2</sub>CH<sub>3</sub>), 56.7 (CH<sub>2</sub>=CHOEt), 29.3, 29.2, 29.0, 28.9, 24.6 (2C), 23.9, 23.8, 23.5, 23.4, 23.3, 23.0, 22.0, 21.7, 15.4 (OCH<sub>2</sub>CH<sub>3</sub>), 14.9 (PdMe).

**3.2 [(α-diimine)PdMe(CH<sub>2</sub>=CHOSiMe<sub>3</sub>)] [SbF<sub>6</sub>] (**3c**[SbF<sub>6</sub>]).** <sup>1</sup>H NMR (CD<sub>2</sub>Cl<sub>2</sub>, -60 °C): δ 7.38-7.25 (m, 6H), 6.91 (dd, *J* = 12, 4; 1H, H<sub>int</sub>), 3.36 (d, *J* = 12, 1H, H<sub>trans</sub>), 3.14 (d, *J* = 4, 1H, H<sub>cis</sub>), 2.87-2.78 (m, 4H, CHMe<sub>2</sub>), 2.32 (s, 3H, N=CMe), 2.24 (s, 3H, N=CMe), 1.36 (d, *J* = 7, 3H, CHMe<sub>2</sub>), 1.33 (d, *J* = 7, 3H, CHMe<sub>2</sub>), 1.28 (d, *J* = 7, 3H, CHMe<sub>2</sub>), 1.23 (d, *J* = 7, 3H, CHMe<sub>2</sub>), 1.18 (d, *J* = 7, 3H, CHMe<sub>2</sub>), 1.15 (d, *J* = 7, 3H, CHMe<sub>2</sub>), 1.12 (d, *J* = 7, 3H, CHMe<sub>2</sub>), 1.06 (d, *J* = 7, 3H, CHMe<sub>2</sub>), 0.25 (s, 9H, OSiMe<sub>3</sub>), 0.15 (s, PdMe). <sup>13</sup>C{<sup>1</sup>H} NMR (CD<sub>2</sub>Cl<sub>2</sub>, -60 °C): δ 179.8 (N=CMe), 175.4 (N=CMe), 143.1 (CH<sub>2</sub>=CHOSiMe<sub>3</sub>), 139.2, 138.7, 138.0, 137.7, 137.5, 137.0, 128.1 (2C), 124.6, 124.5, 124.1, 124.0, 60.6 (CH<sub>2</sub>=CHOSiMe<sub>3</sub>), 28.70, 28.68,

28.31, 28.27, 24.3, 24.0, 23.8, 23.6, 23.4, 23.3, 22.7, 22.6, 21.5, 21.4, 15.6 (PdMe), -1.0 (OSiMe<sub>3</sub>).

**3.3 [( $\alpha$ -diimine)PdMe(CH<sub>2</sub>=CHOSiMe<sub>2</sub>Ph)][SbF<sub>6</sub>] (3d[SbF<sub>6</sub>]).** <sup>1</sup>H NMR (CD<sub>2</sub>Cl<sub>2</sub>, -60 °C):  $\delta$  6.83 (dd,  $J$  = 12, 3; 1H, H<sub>int</sub>), 3.50 (d,  $J$  = 12, 1H, H<sub>trans</sub>), 3.18 (d,  $J$  = 3, 1H, H<sub>cis</sub>), 2.91 (m, 1H, CHMe<sub>2</sub>), 2.83 (m, 1H, CHMe<sub>2</sub>), 2.78 (m, 1H, CHMe<sub>2</sub>), 2.56 (m, 1H, CHMe<sub>2</sub>), 2.34 (s, 3H, N=CMe), 2.22 (s, 3H, N=CMe), 1.29 (m, 6H, CHMe<sub>2</sub>), 1.23 (m, 6H, CHMe<sub>2</sub>), 1.12 (d,  $J$  = 7, 3H, CHMe<sub>2</sub>), 1.03 (m, 6H, CHMe<sub>2</sub>), 0.91 (d,  $J$  = 7, 3H, CHMe<sub>2</sub>), 0.53 (s, 3H, SiCH<sub>3</sub>), 0.44 (s, 3H, SiCH<sub>3</sub>), 0.20 (s, 3H, PdMe); the  $\alpha$ -diimine and free and coordinated CH<sub>2</sub>=CHOSiMePh<sub>2</sub> aromatic resonances overlap and are not listed. Key <sup>13</sup>C NMR (CD<sub>2</sub>Cl<sub>2</sub>, -60 °C) data:  $\delta$  180.2 (N=CMe), 175.6 (N=CMe), 142.6 (CH<sub>2</sub>=CHOSiMePh<sub>2</sub>), 139.2 (Ar, C<sub>ipso</sub>), 138.5 (Ar, C<sub>ipso</sub>), 138.1 (Ar, C<sub>o</sub>), 138.0 (Ar, C<sub>o</sub>), 137.4 (Ar, C<sub>o</sub>), 137.1 (Ar, C<sub>o</sub>), 124.6 (Ar, C<sub>m</sub>), 124.4 (Ar, C<sub>m</sub>), 124.2 (Ar, C<sub>m</sub>), 124.0 (Ar, C<sub>m</sub>), 61.6 (CH<sub>2</sub>=CHOSiMePh<sub>2</sub>), 28.8 (CHMe<sub>2</sub>), 28.7 (CHMe<sub>2</sub>), 28.3 (CHMe<sub>2</sub>, 2C), 24.2 (CHMe<sub>2</sub>), 23.9 (CHMe<sub>2</sub>), 23.8 (CHMe<sub>2</sub>), 23.6 (CHMe<sub>2</sub>), 23.4 (CHMe<sub>2</sub>), 23.3 (CHMe<sub>2</sub>), 22.9 (CHMe<sub>2</sub>), 22.6 (CHMe<sub>2</sub>), 21.5 (N=CMe), 21.4 (N=CMe), 9.0 (PdMe), -2.0 (SiMe), -2.3 (SiMe).

**3.4 [( $\alpha$ -diimine)PdMe(CH<sub>2</sub>=CHOSiMePh<sub>2</sub>)] [SbF<sub>6</sub>] (3e[SbF<sub>6</sub>]).** <sup>1</sup>H NMR (CD<sub>2</sub>Cl<sub>2</sub>, -60 °C):  $\delta$  6.89 (dd,  $J$  = 12, 3; 1H, H<sub>int</sub>), 3.67 (d,  $J$  = 12, 1H, H<sub>trans</sub>), 3.18 (d,  $J$  = 3, 1H, H<sub>cis</sub>), 3.03-2.30 (m, 4H, CHMe<sub>2</sub>), 2.37 (s, 3H, N=CMe), 2.22 (s, 3H, N=CMe), 1.28-1.21 (m, 12H, CHMe<sub>2</sub>), 1.17 (d,  $J$  = 7, 3H, CHMe<sub>2</sub>), 1.12 (d,  $J$  = 7, 3H, CHMe<sub>2</sub>), 1.02 (d,  $J$  = 7, 3H, CHMe<sub>2</sub>), 0.97 (d,  $J$  = 7, 3H, CHMe<sub>2</sub>), 0.70 (s, 3H, SiCH<sub>3</sub>), 0.26 (s, 3H, PdMe); the  $\alpha$ -diimine and free and coordinated CH<sub>2</sub>=CHOSiMePh<sub>2</sub> aromatic resonances overlap and are not listed. Key <sup>13</sup>C NMR (CD<sub>2</sub>Cl<sub>2</sub>, -60 °C) data:  $\delta$  180.5 (N=CMe), 175.7 (N=CMe), 141.8 (CH<sub>2</sub>=CHOSiMePh<sub>2</sub>), 139.2

(Ar, C<sub>ipso</sub>), 138.4 (Ar, C<sub>ipso</sub>), 138.2 (Ar, C<sub>o</sub>), 138.0 (Ar, C<sub>o</sub>), 137.1 (Ar, C<sub>o</sub>), 137.0 (Ar, C<sub>o</sub>), 124.6 (Ar, C<sub>m</sub>), 124.3 (Ar, C<sub>m</sub>), 124.2 (Ar, C<sub>m</sub>), 124.0 (Ar, C<sub>m</sub>), 62.5 (CH<sub>2</sub>=CHOSiMePh<sub>2</sub>), 28.9 (CHMe<sub>2</sub>), 28.8 (CHMe<sub>2</sub>), 28.4 (CHMe<sub>2</sub>, 2C), 24.1 (CHMe<sub>2</sub>), 24.0 (CHMe<sub>2</sub>), 23.8 (CHMe<sub>2</sub>), 23.7 (CHMe<sub>2</sub>), 23.3 (CHMe<sub>2</sub>), 23.1 (CHMe<sub>2</sub>), 22.7 (CHMe<sub>2</sub>), 22.5 (CHMe<sub>2</sub>), 21.5 (N=CMe), 21.4 (N=CMe), 8.9 (PdMe), -1.1 (SiMePh<sub>2</sub>).

**3.5 [( $\alpha$ -diimine)PdMe(CH<sub>2</sub>=CHOSiPh<sub>3</sub>)] [SbF<sub>6</sub>] (3f[SbF<sub>6</sub>]).** <sup>1</sup>H NMR (CD<sub>2</sub>Cl<sub>2</sub>, -60 °C)  $\delta$  7.12 (dd,  $J$  = 12, 4; 1H, H<sub>int</sub>), 3.78 (d,  $J$  = 12, 1H, H<sub>trans</sub>), 3.22 (d,  $J$  = 4, 1H, H<sub>cis</sub>), 2.97-2.65 (m, 4H, CHMe<sub>2</sub>), 2.37 (s, 3H, N=CMe), 2.22 (s, 3H, N=CMe), 1.29 (d,  $J$  = 7, 3H, CHMe<sub>2</sub>), 1.25 (d,  $J$  = 7, 6H, CHMe<sub>2</sub>), 1.11 (d,  $J$  = 7, 3H, CHMe<sub>2</sub>), 1.05 (d,  $J$  = 7, 3H, CHMe<sub>2</sub>), 0.91 (d,  $J$  = 7, 3H, CHMe<sub>2</sub>), 0.84 (d,  $J$  = 7, 3H, CHMe<sub>2</sub>), 0.34 (d,  $J$  = 7, 3H, CHMe<sub>2</sub>), 0.23 (s, 3H, PdMe); the  $\alpha$ -diimine and free and coordinated CH<sub>2</sub>=CHOSiPh<sub>3</sub> aromatic resonances overlap and are not listed. Key <sup>13</sup>C NMR (CD<sub>2</sub>Cl<sub>2</sub>, -60 °C) data:  $\delta$  180.7 (N=CMe), 175.9 (N=CMe), 141.8 (CH<sub>2</sub>=CHOSiPh<sub>3</sub>), 139.2 (Ar, C<sub>ipso</sub>), 138.6 (Ar, C<sub>ipso</sub>), 138.2 (Ar, C<sub>o</sub>), 138.0 (Ar, C<sub>o</sub>), 137.6 (Ar, C<sub>o</sub>), 137.0 (Ar, C<sub>o</sub>), 124.6 (Ar, C<sub>m</sub>), 124.3 (Ar, C<sub>m</sub>), 124.2 (Ar, C<sub>m</sub>), 124.0 (Ar, C<sub>m</sub>), 62.8 (CH<sub>2</sub>=CHOSiPh<sub>3</sub>), 28.9 (CHMe<sub>2</sub>), 28.8 (CHMe<sub>2</sub>), 28.6 (CHMe<sub>2</sub>), 28.4 (CHMe<sub>2</sub>), 24.0 (CHMe<sub>2</sub>), 23.9 (CHMe<sub>2</sub>), 23.7 (CHMe<sub>2</sub>), 23.3 (CHMe<sub>2</sub>), 23.2 (CHMe<sub>2</sub>), 22.7 (CHMe<sub>2</sub>), 22.4 (CHMe<sub>2</sub>), 22.3 (CHMe<sub>2</sub>), 21.5 (N=CMe), 21.4 (N=CMe), 9.0 (PdMe).

**3.6 [( $\alpha$ -diimine)PdMe(CH<sub>2</sub>=CHOPh)] [SbF<sub>6</sub>] (3g[SbF<sub>6</sub>]).** <sup>1</sup>H NMR (CD<sub>2</sub>Cl<sub>2</sub>, -20 °C)<sup>2</sup>  $\delta$  7.51 (t,  $J$  = 8, 2H, H<sub>meta</sub>), 7.39-7.27 (m, 9H), 7.00 (dd,  $J$  = 12, 4; 1H, H<sub>int</sub>), 3.77 (d,  $J$  = 12, 1H, H<sub>trans</sub>), 3.35 (d,  $J$  = 4, 1H, H<sub>cis</sub>), 2.99 (m, 2H, CHMe<sub>2</sub>), 2.88 (m, 1H, CHMe<sub>2</sub>), 2.82 (m, 1H, CHMe<sub>2</sub>), 2.41 (s, 3H, N=CMe), 2.35 (s, 3H, N=CMe), 1.35 (d,  $J$  = 7, 3H, CHMe<sub>2</sub>), 1.24 (d,  $J$  = 7, 3H, CHMe<sub>2</sub>), 1.22 (d,  $J$  = 7, 3H, CHMe<sub>2</sub>), 1.20 (d,  $J$  = 7, 3H, CHMe<sub>2</sub>), 1.18 (d,  $J$  = 7, 3H,

CHMe<sub>2</sub>), 1.10 (d, *J* = 7, 3H, CHMe<sub>2</sub>), 1.08 (d, *J* = 7, 3H, CHMe<sub>2</sub>), 0.94 (d, *J* = 7, 3H, CHMe<sub>2</sub>), 0.26 (s, 3H, PdMe).

**3.7 [(2,6-<sup>i</sup>Pr<sub>2</sub>-C<sub>6</sub>H<sub>3</sub>)N=CAnCAn=N(2,6-<sup>i</sup>Pr<sub>2</sub>-C<sub>6</sub>H<sub>3</sub>)] [SbF<sub>6</sub>] (**3h**[SbF<sub>6</sub>]).** A NMR tube was charged with [(2,6-<sup>i</sup>Pr<sub>2</sub>-C<sub>6</sub>H<sub>3</sub>)N=CAnCAn=N(2,6-<sup>i</sup>Pr<sub>2</sub>-C<sub>6</sub>H<sub>3</sub>)]PdMeCl (19.2 mg, 29.0 μmol), AgSbF<sub>6</sub> (10 mg, 29.1 μmol) and CH<sub>2</sub>=CHOSiPh<sub>3</sub> (8.8 mg, 29.1 μmol), and CD<sub>2</sub>Cl<sub>2</sub> (0.4 mL) was added by vacuum transfer at -78 °C. The tube was shaken to dissolve and thoroughly mix the components, and placed in an NMR probe that had been pre-cooled to -60 °C. NMR spectra at -60 °C showed that **3h**[SbF<sub>6</sub>] (95 %) had formed. <sup>1</sup>H NMR (CD<sub>2</sub>Cl<sub>2</sub>, -60 °C): δ 8.24 (δ, *J* = 8, 1H, An: H<sub>p</sub>), 8.19 (δ, *J* = 8, 1H, An: H<sub>p</sub>'), 7.65-7.33 (m, 23 H, An: H<sub>m</sub>, H<sub>m</sub>', 6 H<sub>aryl</sub>, 15 H<sub>aryl</sub> from SiPh<sub>3</sub>), 7.32 (dd, *J* = 12, 4; 1H, H<sub>int</sub>), 6.49 (δ, *J* = 7, 1H, An: H<sub>o</sub>), 6.39 (δ, *J* = 7, 1H, An: H<sub>o</sub>'), 4.00 (d, *J* = 12, 1H, H<sub>trans</sub>), 3.59 (d, *J* = 4, 1H, H<sub>cis</sub>), 3.29 (m, 1H, CHMe<sub>2</sub>), 3.01 (m, 2H, CHMe<sub>2</sub>), 2.50 (m, 1H, CHMe<sub>2</sub>), 1.29 (d, *J* = 7, 3H, CHMe<sub>2</sub>), 1.27 (br, 3H, CHMe<sub>2</sub>), 1.06 (br, 3H, CHMe<sub>2</sub>), 0.97 (d, *J* = 7, 3H, CHMe<sub>2</sub>), 0.81 (d, *J* = 7, 3H, CHMe<sub>2</sub>), 0.70 (d, 6H, CHMe<sub>2</sub>), 0.51 (s, 3H, PdMe), 0.48 (br, 3H, CHMe<sub>2</sub>). Key <sup>13</sup>C NMR (CD<sub>2</sub>Cl<sub>2</sub>, -60 °C) data: δ 175.4 (N=CMe), 171.2 (N=CMe), 141.7 (CH<sub>2</sub>=CHOSiPh<sub>3</sub>), 145.7, 139.0, 138.8, 138.5, 138.0, 137.3, 137.2, 135.2, 133.6, 132.7, 131.5, 130.9, 129.5, 129.2, 129.1, 128.9, 128.5, 128.2, 126.6, 126.1, 125.2, 125.0, 124.9, 124.8, 124.7 and 124.6 (An 4 quaternary C, C<sub>o</sub>, C<sub>o</sub>', C<sub>m</sub>, C<sub>m</sub>', C<sub>p</sub>, C<sub>p</sub>'; Ar, Ar' C<sub>ipso</sub>, C<sub>ipso</sub>', C<sub>o</sub>, C<sub>o</sub>', C<sub>o</sub>", C<sub>o</sub>", C<sub>m</sub>, C<sub>m</sub>', C<sub>m</sub>", C<sub>m</sub>", C<sub>p</sub>, C<sub>p</sub>'; SiPh C<sub>ipso</sub>, C<sub>o</sub>, C<sub>m</sub>, C<sub>p</sub>), 62.2 (CH<sub>2</sub>=CHOSiPh<sub>3</sub>), 29.4 (CHMe<sub>2</sub>), 29.2 (CHMe<sub>2</sub>), 29.0 (CHMe<sub>2</sub>), 28.9 (CHMe<sub>2</sub>), 24.7 (CHMe<sub>2</sub>), 24.5 (CHMe<sub>2</sub>), 23.8 (CHMe<sub>2</sub>), 23.4 (CHMe<sub>2</sub>), 23.3 (CHMe<sub>2</sub>), 23.0 (CHMe<sub>2</sub>), 22.8 (CHMe<sub>2</sub>), 22.4 (CHMe<sub>2</sub>), 13.4 (PdMe).

**3.8 [{(4-Me-C<sub>6</sub>H<sub>5</sub>)N=CMeCMe=N(4-Me-C<sub>6</sub>H<sub>5</sub>)}PdMe(CH<sub>2</sub>=CHOSiPh<sub>3</sub>)] [SbF<sub>6</sub>] (3i).**

A NMR tube was charged with ( $\alpha$ -diimine-Me)PdMeCl (19.2 mg, 29.0  $\mu$ mol), AgSbF<sub>6</sub> (10 mg, 29.1  $\mu$ mol) and CH<sub>2</sub>=CHOSiPh<sub>3</sub> (8.8 mg, 29.1  $\mu$ mol), and CD<sub>2</sub>Cl<sub>2</sub> (0.4 mL) was added by vacuum transfer at -78 °C. The tube was shaken to dissolve and thoroughly mix the components. NMR spectra at -70 °C showed that two rotamers of **3i** (95 %) had formed. <sup>1</sup>H NMR (CD<sub>2</sub>Cl<sub>2</sub>, -70 °C)  $\delta$  7.59 (t, J = 7 Hz, 12H, C<sub>m</sub>, Si-Ph), 7.55 (d, J = 7 Hz, 12H, C<sub>o</sub>, Si-Ph), 7.44 (t, J = 7 Hz, 6H, C<sub>p</sub>, Si-Ph), 7.35 (d, J = 4 Hz, 1H, Ar), 7.32 (d, J = 4 Hz, 1H, Ar), 7.26 (b, 1H, Ar), 7.25 (d, 2H, Ar), 7.17 (d, J = 4 Hz, 1H, Ar), 6.94 (d, J = 4 Hz, 1H, Ar), 6.92 (d, J = 4 Hz, 1H, Ar), 6.90 (d, 1H, H<sub>int</sub>), 6.78 (d, J = 4 Hz, 1H, Ar), 6.76 (d, J = 4 Hz, 1H, Ar), 6.74 (d, J = 4 Hz, 1H, Ar), 6.67 (d, J = 4 Hz, 1H, Ar), 6.65 (d, J = 4 Hz, 1H, Ar), 6.64 (d, J = 4 Hz, 1H, Ar), 6.34 (d, 1H, H<sub>int</sub>), 6.05 (d, J = 4 Hz, 1H, Ar), 5.62 (d, J = 4 Hz, 1H, Ar), 3.78 (d, J = 12, 1H, H<sub>trans</sub>), 3.56 (b, 2H, H<sub>cis</sub>), 3.49 (d, J = 12, 1H, H<sub>trans</sub>), 2.37, 2.34, 2.32, 2.25, 2.24, 2.16, 2.04, 1.91, 0.17 (s, 3H, Pd-Me), -0.18 (s, 3H, Pd-Me).



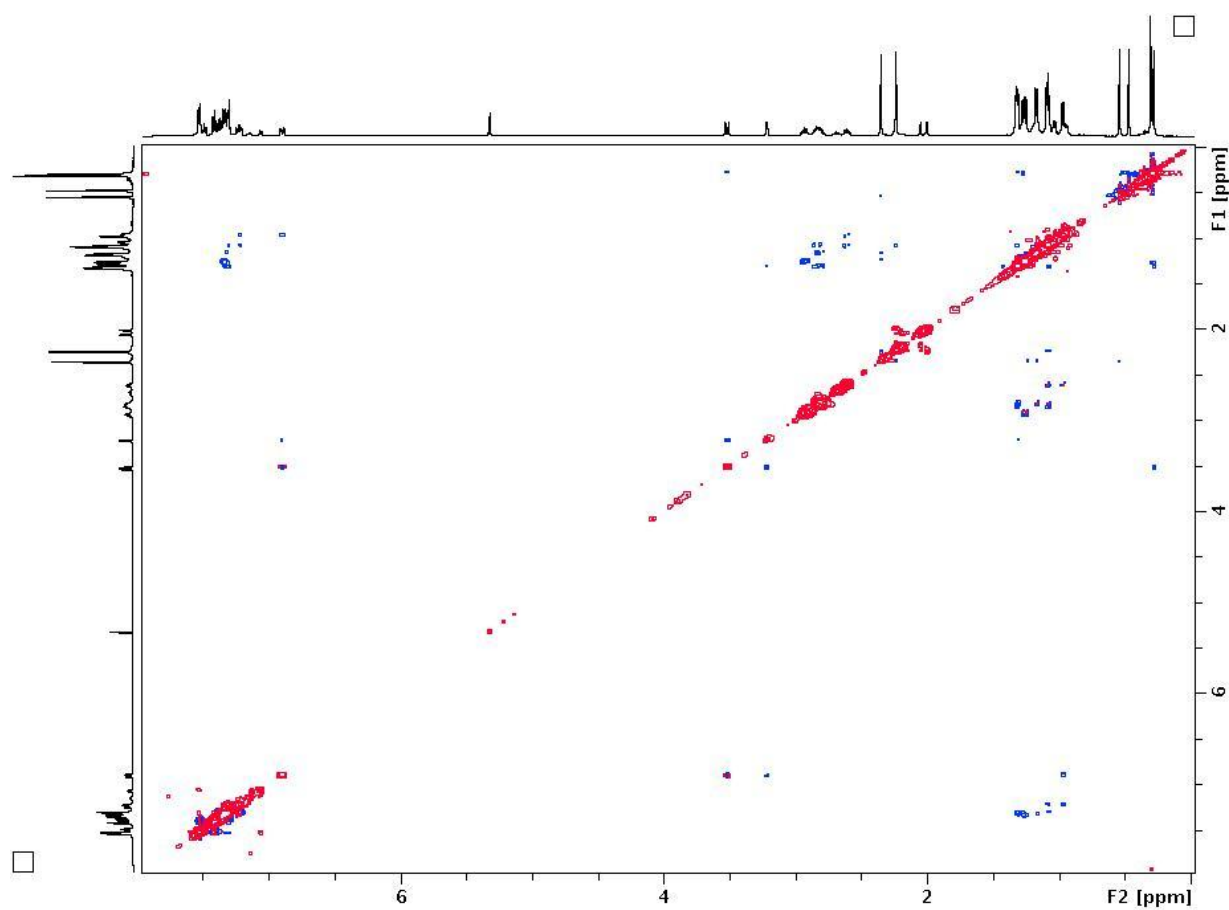

**Figure 3.1.** NOSEY NMR of **3d**[SbF<sub>6</sub>] (CD<sub>2</sub>Cl<sub>2</sub>, -20 °C): expansion of the  $\delta$  8.0-0.0;8.0-0.0 region.

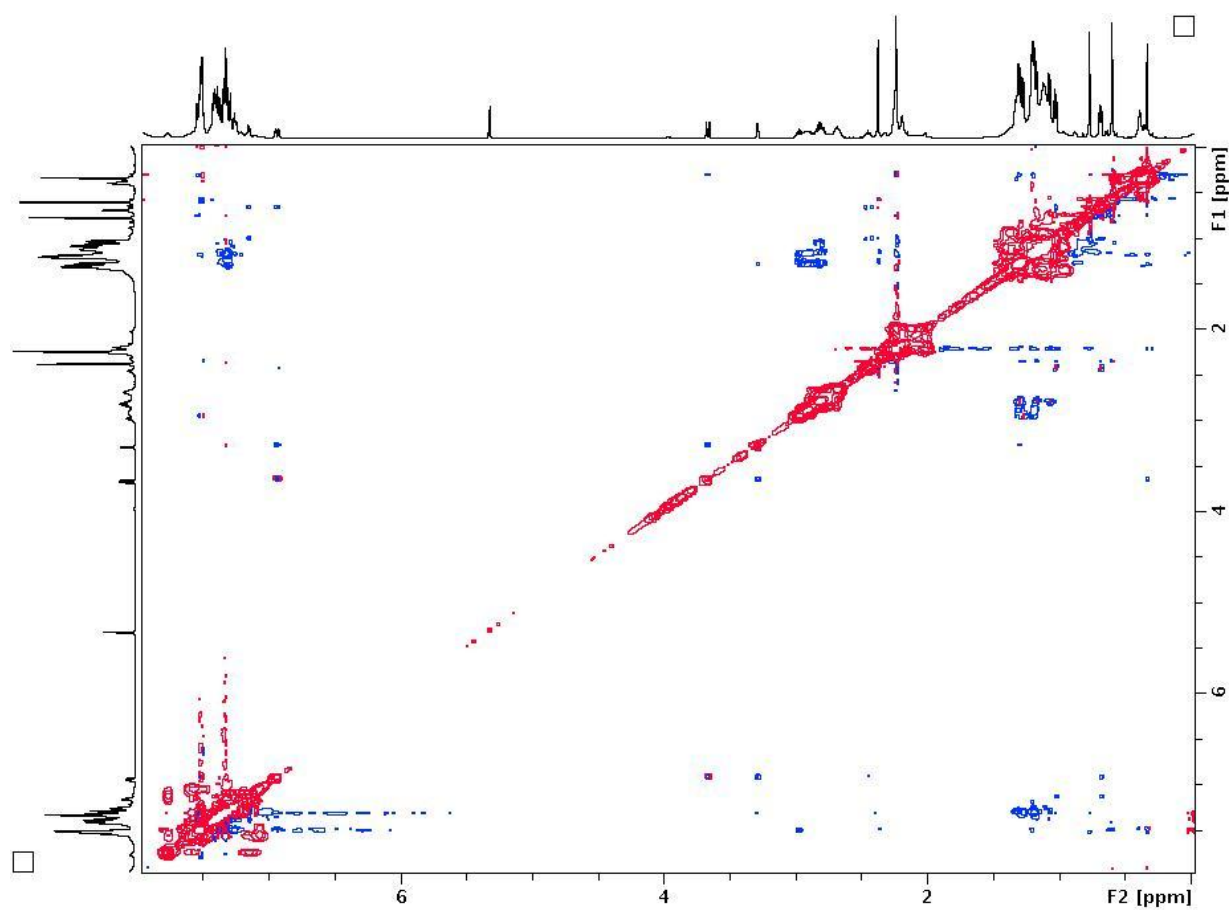

**Figure 3.2.** NOSEY NMR of **3e**[SbF<sub>6</sub>] (CD<sub>2</sub>Cl<sub>2</sub>, -20 °C): expansion of the  $\delta$  8.0-0.0;8.0-0.0 region.

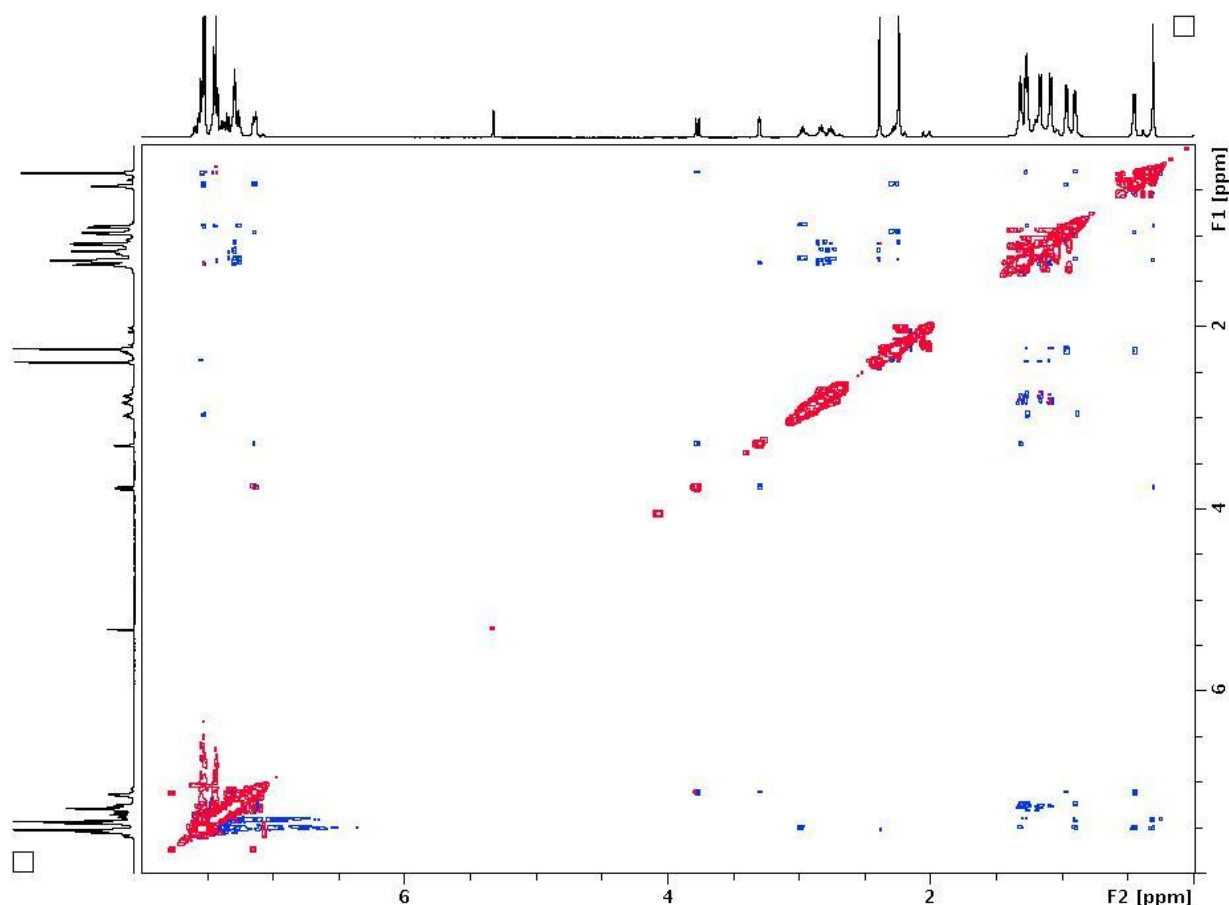

**Figure 3.3.** NOSEY NMR of **3f**[SbF<sub>6</sub>] (CD<sub>2</sub>Cl<sub>2</sub>, -20 °C): expansion of the  $\delta$  8.0-0.0;8.0-0.0 region.

#### 4. Competitive Binding Studies.

**4.1 Competitive binding of 2d-g and 2c to 1[SbF<sub>6</sub>] at -20 °C (eq 5).** The procedure for **2d** is described here; an identical procedure was used for **2e-g**. An NMR tube was charged with **1**[SbF<sub>6</sub>] (15.0 mg, 0.0179 mmol) and **2d** (31.0 mg, 0.258 mmol). CD<sub>2</sub>Cl<sub>2</sub> (0.4 mL) and **2c** (0.034 mmol) were added by vacuum transfer at -196 °C. The tube was warmed to -78 °C, shaken and placed in an NMR probe that had been pre-cooled to -20 °C. The reaction was monitored periodically by <sup>1</sup>H NMR at -20 °C until after 30 min, when the reaction quotient  $Q_{2e/2c} = [\mathbf{3d}][\mathbf{2c}][\mathbf{3c}]^{-1}[\mathbf{2d}]^{-1}$  reached a constant value. Additional **2d** (0.14 mmol) was added by

vacuum transfer to change the **2c/2d** ratio, and the tube was monitored by  $^1\text{H}$  NMR at  $-20\text{ }^\circ\text{C}$  until  $Q_{2d/2c}$  again reached a constant value. The process was repeated one more time and the average  $K_{2d/2c}$  value is reported in Table 2 of the text.

**4.2 Competitive binding of ethylene and  $\text{CH}_2=\text{CHOR}$  (**2a-c**, **2g**) to  $1[\text{B}(\text{C}_6\text{F}_5)_4]$  at  $-60\text{ }^\circ\text{C}$  (eq 4).** The procedure for **2a** is described here; an identical procedure was used for **2b**, **2c**, **2f**, **2g**. An NMR tube was charged with  $(\alpha\text{-diimine})\text{PdMeCl}$  (11.2 mg, 0.0199 mmol) and  $[\text{Li}(\text{Et}_2\text{O})_{2.8}][\text{B}(\text{C}_6\text{F}_5)_4]$  (17.5 mg, 0.0196 mmol).  $\text{CD}_2\text{Cl}_2$  (0.4 mL) was added by vacuum transfer at  $-196\text{ }^\circ\text{C}$ . The tube was warmed to  $20\text{ }^\circ\text{C}$  and shaken. Ethylene (0.062 mmol) and **2a** (0.040 mmol) were added by vacuum transfer at  $-196\text{ }^\circ\text{C}$ . The tube was warmed to  $-78\text{ }^\circ\text{C}$ , shaken, and placed in an NMR probe that had been pre-cooled to  $-60\text{ }^\circ\text{C}$ . The reaction was monitored periodically by  $^1\text{H}$  NMR at  $-60\text{ }^\circ\text{C}$  until after 1 h, when the reaction quotient  $Q_{2a/\text{ethylene}} = [\mathbf{3a}][\text{CH}_2=\text{CH}_2][(\alpha\text{-diimine})\text{PdMe}(\text{CH}_2=\text{CH}_2)^+]^{-1}[\mathbf{2a}]^{-1}$  reached a constant value. Additional **2a** (0.062 mmol) was added by vacuum transfer to change the ethylene/**2a** ratio, and the tube was monitored by  $^1\text{H}$  NMR at  $-60\text{ }^\circ\text{C}$  until  $Q_{2a/\text{ethylene}}$  reached a constant value again.

## 5. Reaction of $\text{CH}_2=\text{CHO}^t\text{Bu}$ (**2a**) with $1[\text{B}(\text{C}_6\text{F}_5)_4]$ .

**5.1 Kinetics of insertion of  $\mathbf{3a}[\text{B}(\text{C}_6\text{F}_5)_4]$ .** The first-order rate constant for the consumption of  $\mathbf{3a}[\text{B}(\text{C}_6\text{F}_5)_4]$ ,  $k_{\text{insert}, \mathbf{3a}}$ , was measured by the disappearance of the  $\text{PdMe}$   $^1\text{H}$  NMR resonance and the increase of the  $\text{PdCH}_2\text{CHMe}$  resonance of  $\mathbf{4a}[\text{B}(\text{C}_6\text{F}_5)_4]$  plus the  $\text{PdCMe}_2$  resonance of  $\mathbf{5a}[\text{B}(\text{C}_6\text{F}_5)_4]$ , both at  $0\text{ }^\circ\text{C}$  and at  $20\text{ }^\circ\text{C}$ .

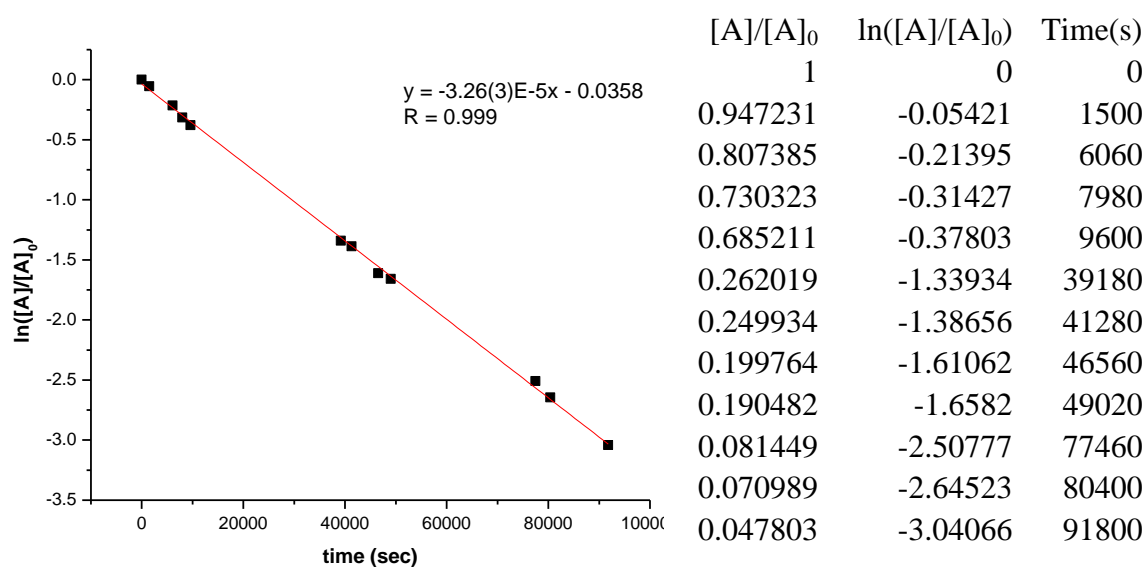

**Figure 5.1.** First-order consumption of **3a**[B(C<sub>6</sub>F<sub>5</sub>)<sub>4</sub>] at 0 °C.

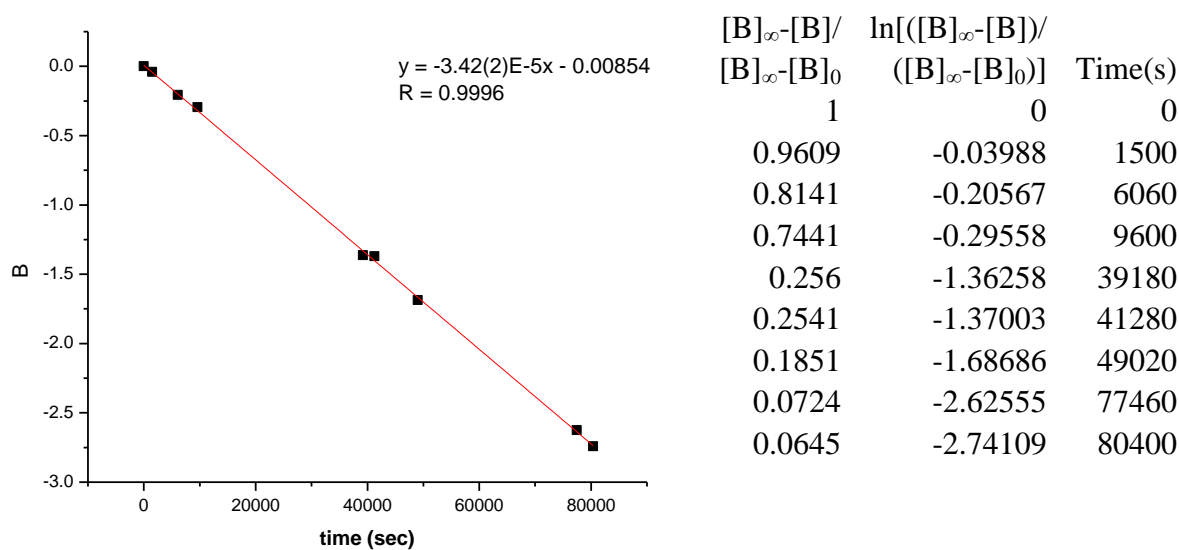

**Figure 5.2.** First-order consumption of **3a**[B(C<sub>6</sub>F<sub>5</sub>)<sub>4</sub>] at 0 °C based on the increase of the sum of **4a**[B(C<sub>6</sub>F<sub>5</sub>)<sub>4</sub>] + **5a**[B(C<sub>6</sub>F<sub>5</sub>)<sub>4</sub>].  $B = \ln\left(\frac{[B]_{\infty}-[B]}{[B]_{\infty}-[B]_0}\right)$ .

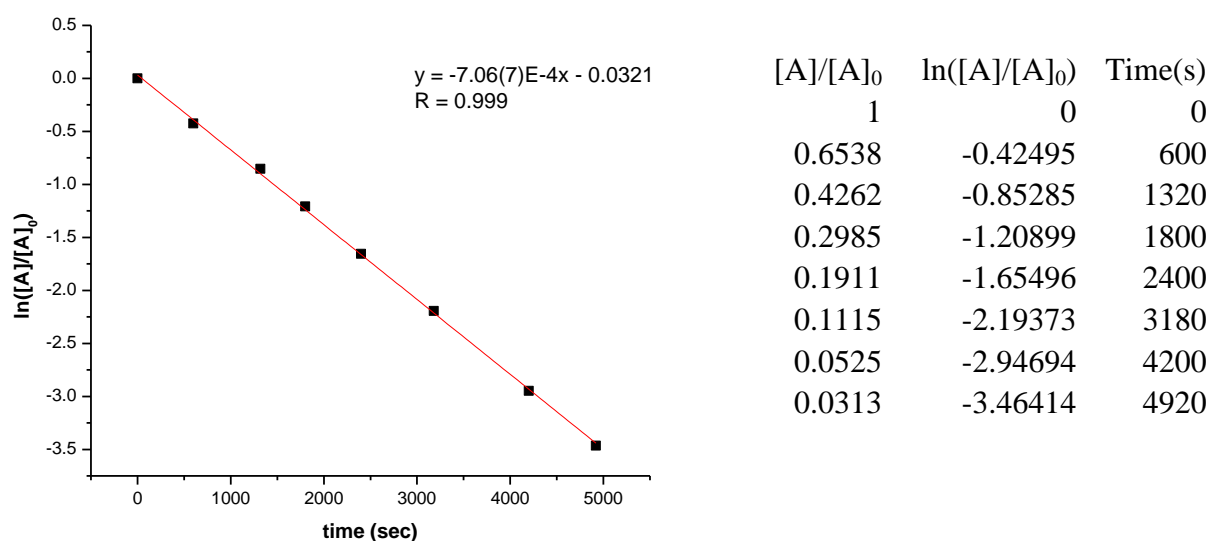

**Figure 5.3.** First-order consumption of **3a**[B(C<sub>6</sub>F<sub>5</sub>)<sub>4</sub>] at 20 °C.

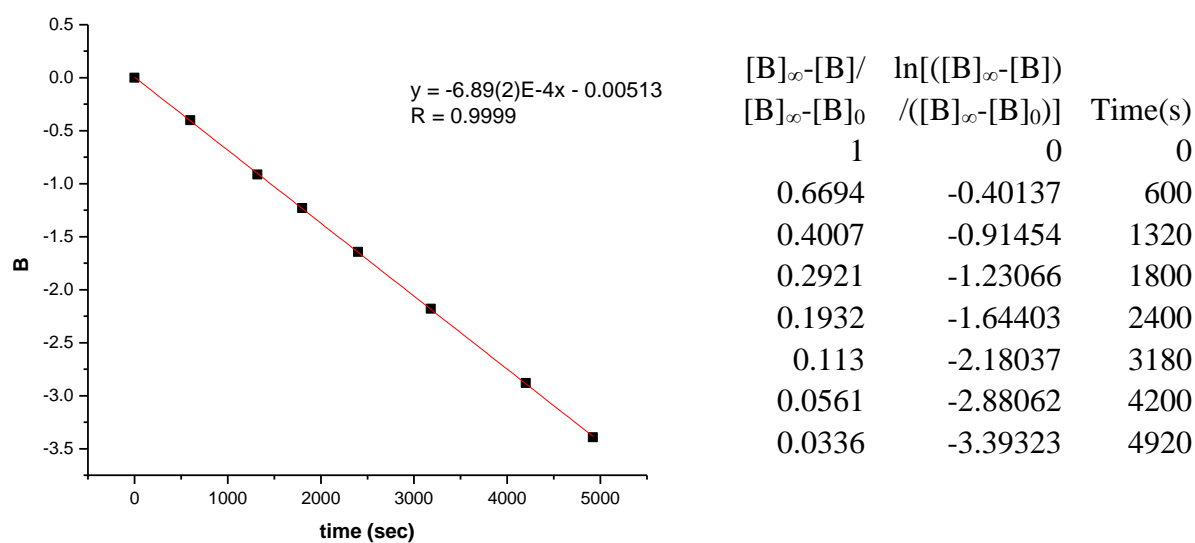

**Figure 5.4.** First-order consumption of **3a**[B(C<sub>6</sub>F<sub>5</sub>)<sub>4</sub>] at 20 °C based on the increase of the sum of **4a**[B(C<sub>6</sub>F<sub>5</sub>)<sub>4</sub>] + **5a**[B(C<sub>6</sub>F<sub>5</sub>)<sub>4</sub>].  $B = \ln\left(\frac{[B]_{\infty}-[B]}{[B]_{\infty}-[B]_0}\right)$ .

**5.2 Kinetics of the  $\beta$ -O<sup>t</sup>Bu elimination of **5a**[B(C<sub>6</sub>F<sub>5</sub>)<sub>4</sub>] and **4a**[B(C<sub>6</sub>F<sub>5</sub>)<sub>4</sub>].** The first-order rate constant for consumption of the total of **4a**[B(C<sub>6</sub>F<sub>5</sub>)<sub>4</sub>] and **5a**[B(C<sub>6</sub>F<sub>5</sub>)<sub>4</sub>],  $k_{\beta\text{-OtBu, obs}}$ , was measured by the disappearance of the PdCH<sub>2</sub>CHMe resonance of **4a**[B(C<sub>6</sub>F<sub>5</sub>)<sub>4</sub>] and the PdCMe<sub>2</sub> resonance of **5a**[B(C<sub>6</sub>F<sub>5</sub>)<sub>4</sub>] and the increase of the  $H_{\text{int}}$  resonance of **6**[B(C<sub>6</sub>F<sub>5</sub>)<sub>4</sub>] at 20 °C.

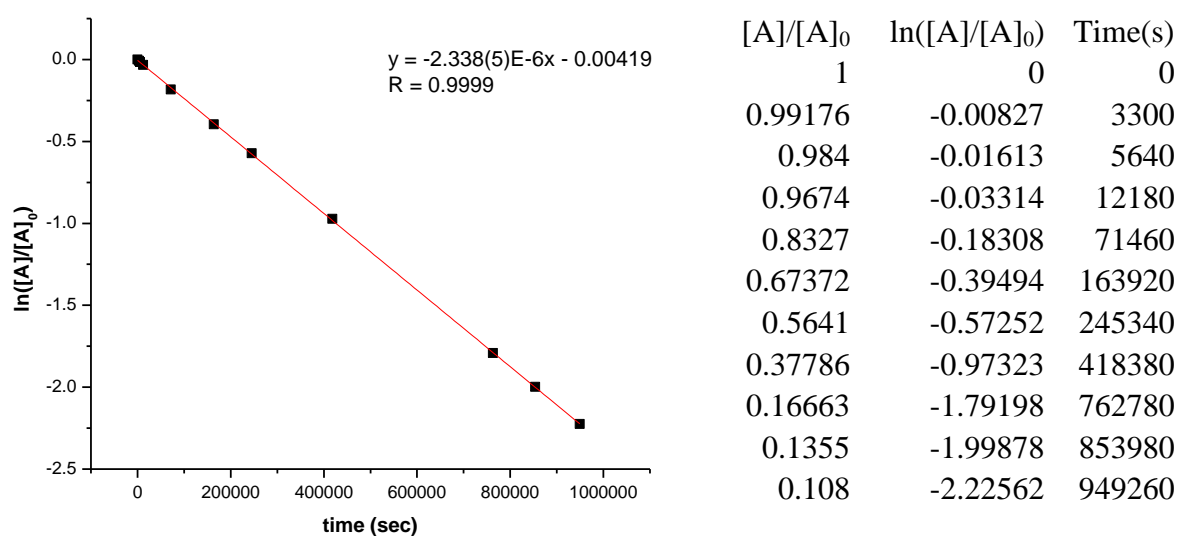

**Figure 5.5.** First-order consumption of the sum of **4a**[B(C<sub>6</sub>F<sub>5</sub>)<sub>4</sub>] + **5a**[B(C<sub>6</sub>F<sub>5</sub>)<sub>4</sub>] at 20 °C.

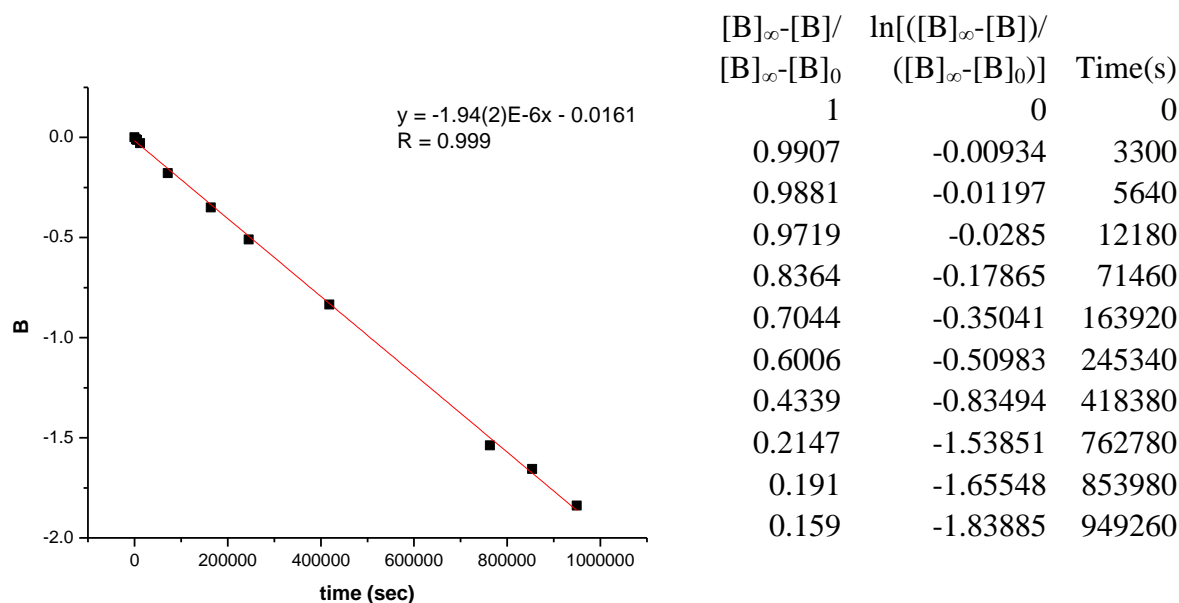

**Figure 5.6.** First-order consumption of the sum of **4a**[B(C<sub>6</sub>F<sub>5</sub>)<sub>4</sub>] + **5a**[B(C<sub>6</sub>F<sub>5</sub>)<sub>4</sub>] at 20 °C based on the increase of **6**[B(C<sub>6</sub>F<sub>5</sub>)<sub>4</sub>].  $B = \ln\left(\frac{[B]_{\infty}-[B]}{[B]_{\infty}-[B]_0}\right)$ .

## 6. Reaction of 1[B(C<sub>6</sub>F<sub>5</sub>)<sub>4</sub>] with 2b-g.

**6.1 Reaction of 1[B(C<sub>6</sub>F<sub>5</sub>)<sub>4</sub>] with CH<sub>2</sub>=CHOEt (2b).** An NMR tube was charged with (α-diimine)PdMeCl (14.0 mg, 0.0249 mmol) and [Li(Et<sub>2</sub>O)<sub>2.8</sub>][B(C<sub>6</sub>F<sub>5</sub>)<sub>4</sub>] (22.0 mg, 0.0246 mmol) and CH<sub>2</sub>Cl<sub>2</sub> (0.4 mL) were added by vacuum transfer at -196 °C. The tube was warmed to 20 °C, shaken vigorously. After 20min, **2b** (0.0325 mmol) were added by vacuum transfer at -196 °C. The tube was kept at 0 °C for 10 min. All the volatiles were evacuated and CD<sub>2</sub>Cl<sub>2</sub> (0.4 mL) was added by vacuum transfer at -196 °C. The tube was warmed to 20 °C, shaken vigorously and monitored periodically by NMR. NMR analysis showed that after 10 min, a mixture of [{(α-diimine)PdMe}<sub>2</sub>(μ-Cl)]<sup>+</sup> (8 %), [(α-diimine)PdMe(CH<sub>2</sub>=CHOEt)][B(C<sub>6</sub>F<sub>5</sub>)<sub>4</sub>] (**3b**[B(C<sub>6</sub>F<sub>5</sub>)<sub>4</sub>], 27 %), [(α-diimine)Pd{CH<sub>2</sub>CH(OEt)Me}][B(C<sub>6</sub>F<sub>5</sub>)<sub>4</sub>] (**4b**[B(C<sub>6</sub>F<sub>5</sub>)<sub>4</sub>], 18 %), [(α-diimine)Pd{CMe<sub>2</sub>(OEt)}][B(C<sub>6</sub>F<sub>5</sub>)<sub>4</sub>] (**5b**[B(C<sub>6</sub>F<sub>5</sub>)<sub>4</sub>], 35 %), **6**[B(C<sub>6</sub>F<sub>5</sub>)<sub>4</sub>] (12 %) and C<sub>2</sub>H<sub>5</sub>OH (12 %) was present. After 1 h, **6** and C<sub>2</sub>H<sub>5</sub>OH<sup>3</sup> had formed quantitatively. The



$\alpha$ -diimine and OEt  $^1\text{H}$  NMR resonances of **3b**[B(C<sub>6</sub>F<sub>5</sub>)<sub>4</sub>], **4b**[B(C<sub>6</sub>F<sub>5</sub>)<sub>4</sub>] and **5b**[B(C<sub>6</sub>F<sub>5</sub>)<sub>4</sub>] overlap. Therefore only key NMR data are listed. **Key Data for 4b**[B(C<sub>6</sub>F<sub>5</sub>)<sub>4</sub>]:  $^1\text{H}$  NMR (CD<sub>2</sub>Cl<sub>2</sub>, 0 °C)  $\delta$  4.86 (sextet,  $J = 7$ , PdCH<sub>2</sub>CH(OEt)Me), 3.41 (q,  $J = 7$ , 2H, OCH<sub>2</sub>CH<sub>3</sub>), 2.20 (s, 3H, N=CMe), 2.16 (s, 3H, N=CMe), 0.59 (t,  $J = 7$ , 3H, OCH<sub>2</sub>CH<sub>3</sub>), 0.37 (t,  $J = 7$ , PdCHH'CH(OEt)Me). The PdCHH'CH(OEt)Me and PdCH<sub>2</sub>CH(OEt)Me resonances are obscured by the  $\alpha$ -diimine resonances. **Key Data for 5b**[B(C<sub>6</sub>F<sub>5</sub>)<sub>4</sub>]:  $^1\text{H}$  NMR (CD<sub>2</sub>Cl<sub>2</sub>, 0 °C)  $\delta$  3.56 (q,  $J = 7$ , 2H, OCH<sub>2</sub>CH<sub>3</sub>), 2.92 (septa,  $J = 7$ , 1H, CHMe<sub>2</sub>), 2.23 (s, 3H, N=CMe), 2.19 (s, 3H, N=CMe), 1.41 (d,  $J = 7$ , 6H, CHMe<sub>2</sub>), 1.39 (d,  $J = 7$ , 6H, CHMe<sub>2</sub>), 1.29 (d,  $J = 7$ , 6H, CHMe<sub>2</sub>), 1.16 (d,  $J = 7$ , 6H, CHMe<sub>2</sub>), 0.60 (s, PdCMe<sub>2</sub>(OEt)) 0.55 (t,  $J = 7$ , PdCMe<sub>2</sub>(OCH<sub>2</sub>CH<sub>3</sub>)). The first-order rate constant for the consumption of **3b**[B(C<sub>6</sub>F<sub>5</sub>)<sub>4</sub>] measured by the disappearance of the PdMe  $^1\text{H}$  NMR resonance is  $k_{\text{insert}, 3c} = 8.01(6) \times 10^{-5} \text{ s}^{-1}$  at 0 °C and  $k_{\text{insert}, 3c} = \sim 2.0 \times 10^{-3} \text{ s}^{-1}$  at 20 °C (ca. 83% consumption after 15 min). The first-order rate constant for consumption of the total of **4b**[B(C<sub>6</sub>F<sub>5</sub>)<sub>4</sub>] and **5b**[B(C<sub>6</sub>F<sub>5</sub>)<sub>4</sub>] measured by the disappearance of the PdCH<sub>2</sub>CHMe resonance of **4b**[B(C<sub>6</sub>F<sub>5</sub>)<sub>4</sub>] and the PdCMe<sub>2</sub> resonance of **5b**[B(C<sub>6</sub>F<sub>5</sub>)<sub>4</sub>], or by the appearance of the H<sub>int</sub> resonance of **6**[B(C<sub>6</sub>F<sub>5</sub>)<sub>4</sub>] is  $k_{\beta\text{-OEt, obs}} = 9.12(1) \times 10^{-4} \text{ s}^{-1}$  at 20 °C.

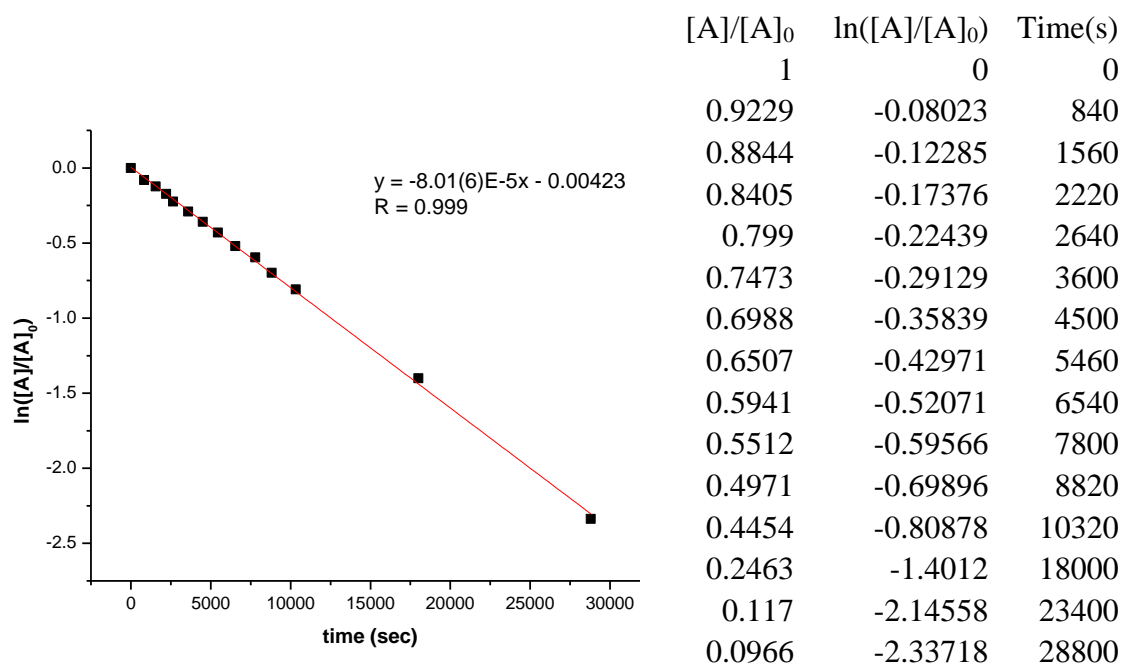

**Figure 6.1.** First-order consumption of **3b**[B(C<sub>6</sub>F<sub>5</sub>)<sub>4</sub>] at 0 °C.

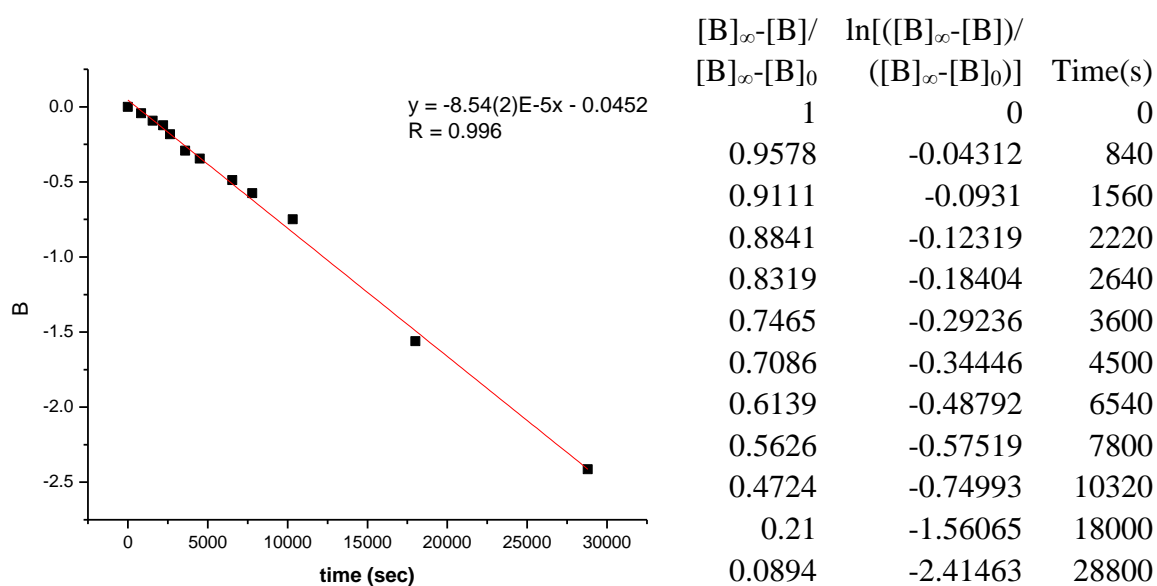

**Figure 6.2.** First-order consumption of **3b**[B(C<sub>6</sub>F<sub>5</sub>)<sub>4</sub>] at 0 °C based on the increase of the sum of **4b**[B(C<sub>6</sub>F<sub>5</sub>)<sub>4</sub>] + **5b**[B(C<sub>6</sub>F<sub>5</sub>)<sub>4</sub>] + **6**[B(C<sub>6</sub>F<sub>5</sub>)<sub>4</sub>].  $B = \ln\left(\frac{[B]_{\infty}-[B]}{[B]_{\infty}-[B]_0}\right)$ .

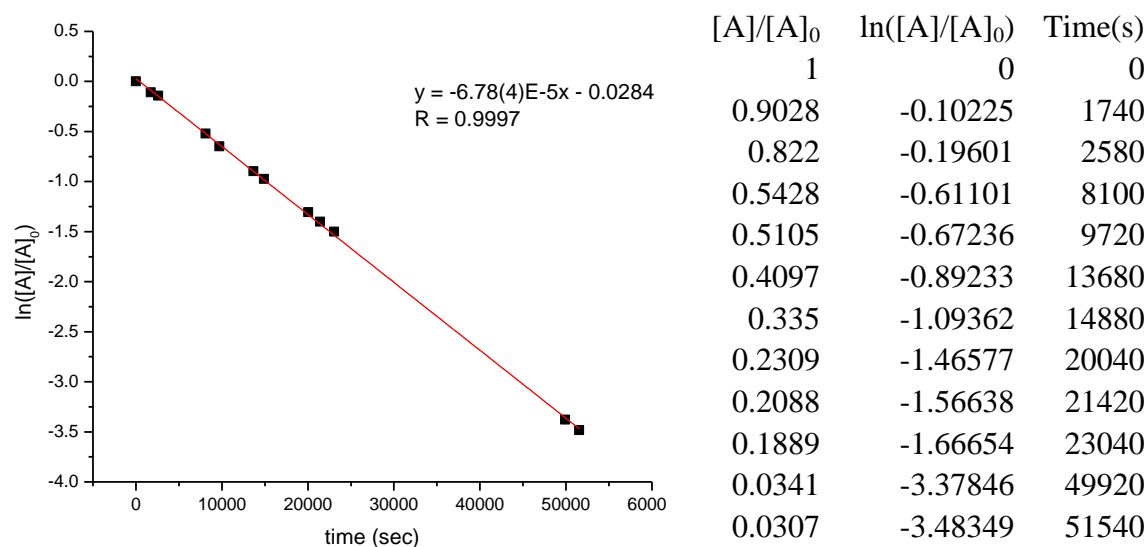

**Figure 6.3.** First-order consumption of the sum of **4b**[B(C<sub>6</sub>F<sub>5</sub>)<sub>4</sub>] + **5b**[B(C<sub>6</sub>F<sub>5</sub>)<sub>4</sub>] at 0 °C.

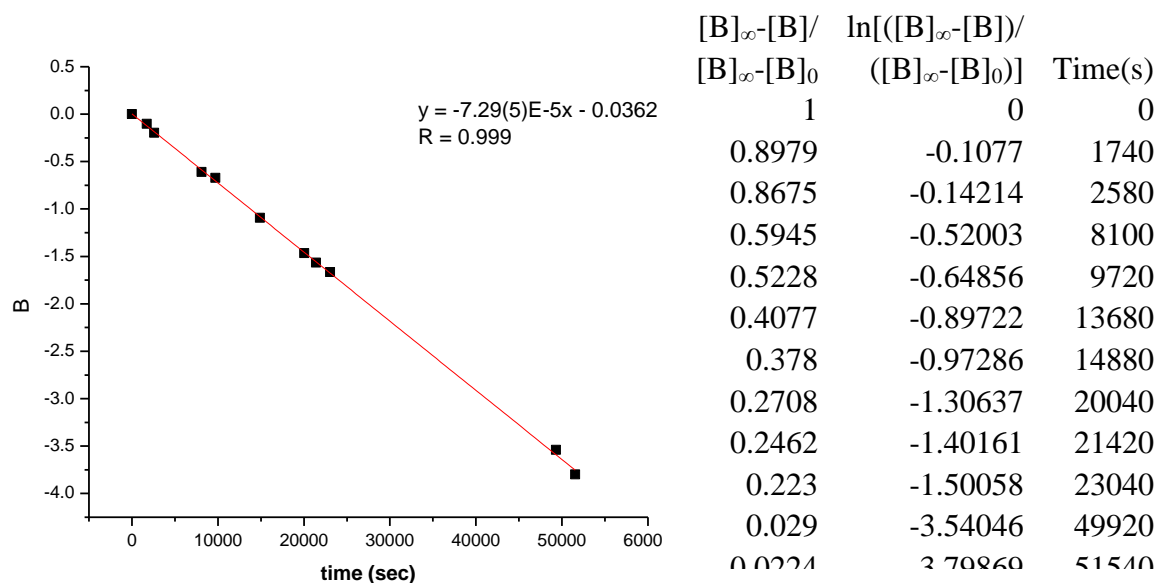

**Figure 6.4.** First-order consumption of the sum of **4b**[B(C<sub>6</sub>F<sub>5</sub>)<sub>4</sub>] + **5b**[B(C<sub>6</sub>F<sub>5</sub>)<sub>4</sub>] at 0 °C based on increase of **6**[B(C<sub>6</sub>F<sub>5</sub>)<sub>4</sub>].  $B = \ln\left(\frac{[B]_{\infty}-[B]}{[B]_{\infty}-[B]_0}\right)$ .

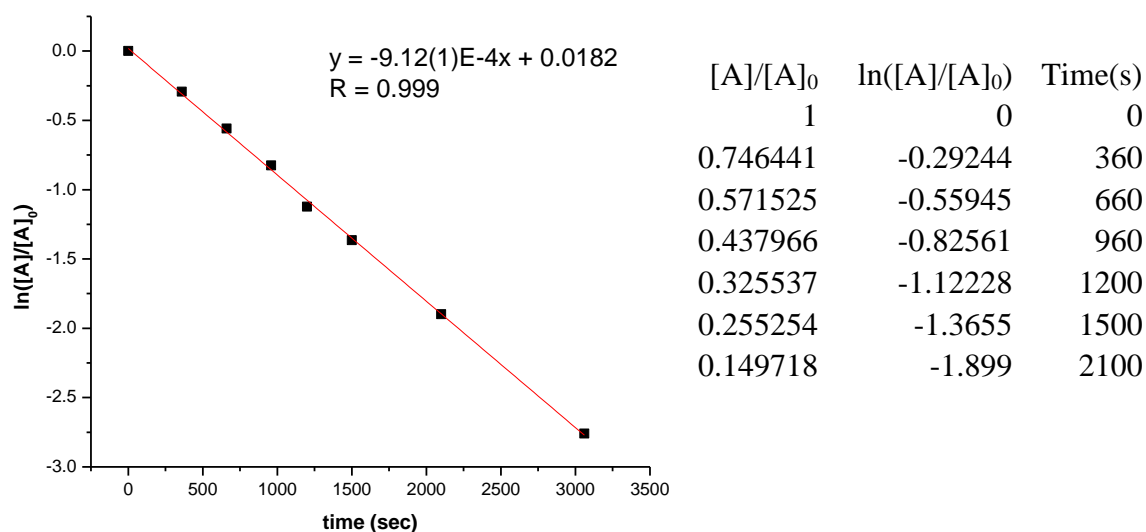

**Figure 6.5.** First-order consumption of the sum of **4b**[B(C<sub>6</sub>F<sub>5</sub>)<sub>4</sub>] + **5b**[B(C<sub>6</sub>F<sub>5</sub>)<sub>4</sub>] at 20 °C.

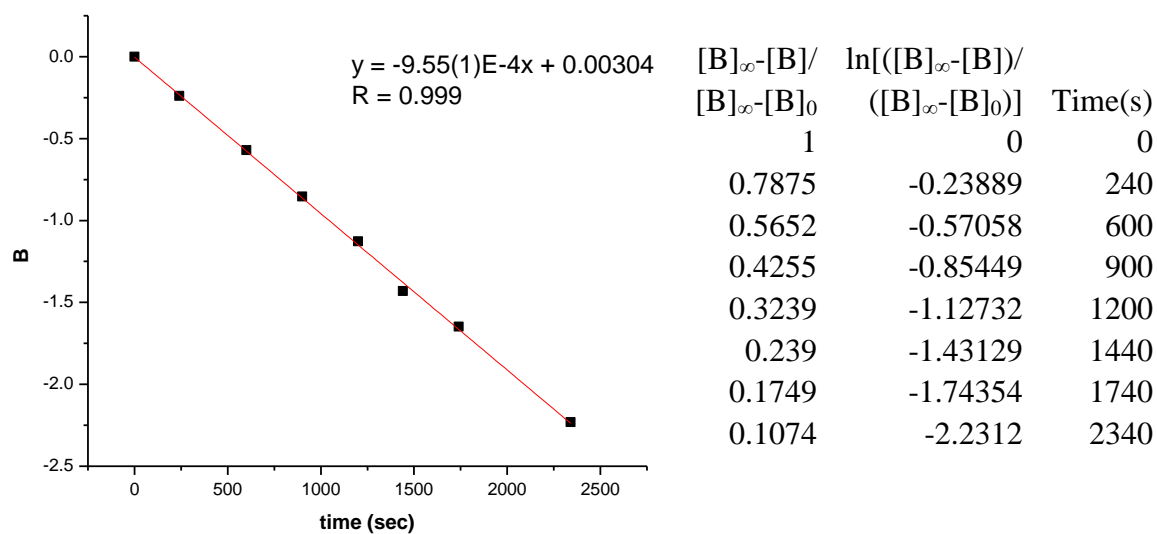

**Figure 6.6.** First-order consumption of the sum of **4b**[B(C<sub>6</sub>F<sub>5</sub>)<sub>4</sub>] + **5b**[B(C<sub>6</sub>F<sub>5</sub>)<sub>4</sub>] at 20 °C based on increase of **6**[B(C<sub>6</sub>F<sub>5</sub>)<sub>4</sub>].  $B = \ln([(B)_{\infty} - [B]] / ([B]_{\infty} - [B]_0))$ .

**6.2 Reaction of 1[B(C<sub>6</sub>F<sub>5</sub>)<sub>4</sub>] with CH<sub>2</sub>=CHOSiMe<sub>3</sub> (2c).** An NMR tube was charged with (α-diimine)PdMeCl (14.0 mg, 0.0249 mmol) and [Li(Et<sub>2</sub>O)<sub>2.8</sub>][B(C<sub>6</sub>F<sub>5</sub>)<sub>4</sub>] (22.0 mg, 0.0246 mmol) and CD<sub>2</sub>Cl<sub>2</sub> (0.4 mL) were added by vacuum transfer at -196 °C. The tube was warmed to 20 °C, shaken vigorously. After 20min, **2c** (0.0225 mmol) were added by vacuum transfer at -196 °C. The tube was warmed to 20 °C, shaken vigorously and monitored periodically by NMR. NMR analysis showed that after 10 min, [(α-diimine)Pd{CMe<sub>2</sub>(OSiMe<sub>3</sub>)}][B(C<sub>6</sub>F<sub>5</sub>)<sub>4</sub>] (**5c**[B(C<sub>6</sub>F<sub>5</sub>)<sub>4</sub>]) had formed quantitatively. <sup>1</sup>H NMR (CD<sub>2</sub>Cl<sub>2</sub>): δ 7.35 (s, 3H), 7.31 (s, 3H), 3.05 (sept, *J* = 7, 2H, CHMe<sub>2</sub>), 2.95 (sept, *J* = 7, 2H, CHMe<sub>2</sub>), 2.22 (s, 3H, N=CMe), 2.17 (s, 3H, N=CMe), 1.44 (d, *J* = 7, 6H, CHMe<sub>2</sub>), 1.40 (d, *J* = 7, 6H, CHMe<sub>2</sub>), 1.27 (d, *J* = 7, 6H, CHMe<sub>2</sub>), 1.16 (d, *J* = 7, 6H, CHMe<sub>2</sub>), 0.54 (s, 6H, PdCMe<sub>2</sub>(OSiMe<sub>3</sub>)), -0.07 (s, 9H, OSiMe<sub>3</sub>); the aromatic region is simpler than expected due to accidental degeneracies. <sup>13</sup>C{<sup>1</sup>H} NMR (CD<sub>2</sub>Cl<sub>2</sub>, -60 °C): δ 174.2 (N=CMe), 170.7 (N=CMe), 143.2, 142.6, 136.5, 135.9, 127.6, 127.2, 124.1, 123.8, 84.5 (PdCMe<sub>2</sub>(OSiMe<sub>3</sub>)), 28.7, 28.4, 25.4, 23.4, 23.2, 22.4, 22.2, 20.9, 18.9, -0.3 (OSiMe<sub>3</sub>). **ESI-MS:** (α-diimine)Pd{CMe<sub>2</sub>(OSiMe<sub>3</sub>)}<sup>+</sup> calcd. *m/z* = 641.3, found 641.2. **5c**[B(C<sub>6</sub>F<sub>5</sub>)<sub>4</sub>] converts to Me<sub>3</sub>SiOH and **6**[B(C<sub>6</sub>F<sub>5</sub>)<sub>4</sub>].<sup>4</sup> Me<sub>3</sub>SiOH was slowly converted to Me<sub>3</sub>SiOSiMe<sub>3</sub> in CD<sub>2</sub>Cl<sub>2</sub> at RT over 1 week.

The first-order rate constant for consumption of **5c**[B(C<sub>6</sub>F<sub>5</sub>)<sub>4</sub>] measured by the disappearance of the PdCMe<sub>2</sub> resonance is  $k_{\beta\text{-OSiMe}_3, \text{obs}} = 3.22(2) \times 10^{-5} \text{ s}^{-1}$  at 20 °C. Since  $K_{5c/4c} > 20$ , the actual β-OSiMe<sub>3</sub> elimination rate constant  $k_{\beta\text{-OSiMe}_3} = k_{\beta\text{-OSiMe}_3, \text{obs}} (K_{5c/4c} + 1) > 7.35 \times 10^{-4} \text{ s}^{-1}$ .

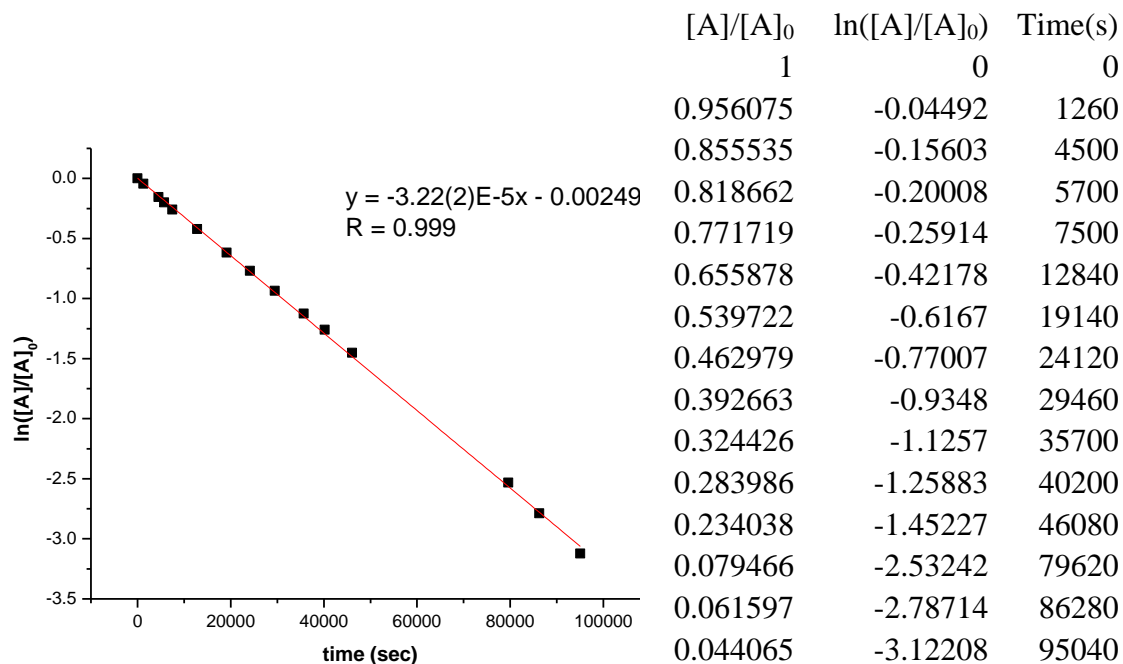

**Figure 6.7.** First-order consumption of **5c**[B(C<sub>6</sub>F<sub>5</sub>)<sub>4</sub>] at 20 °C.

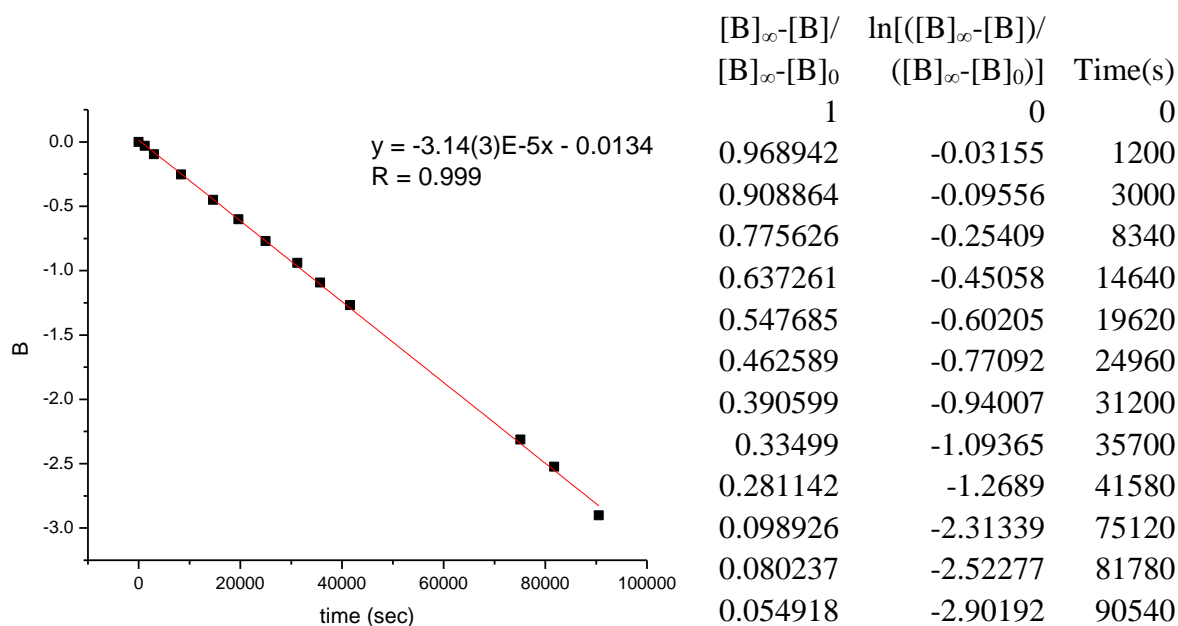

**Figure 6.8.** First-order consumption of **5c**[B(C<sub>6</sub>F<sub>5</sub>)<sub>4</sub>] at 20 °C based on the increase of **6**[B(C<sub>6</sub>F<sub>5</sub>)<sub>4</sub>].  $B = \ln([B]_{\infty}-[B])/([B]_{\infty}-[B]_0)$ .

**6.3 Reaction of  $5\mathbf{c}[\mathbf{B}(\mathbf{C}_6\mathbf{F}_5)_4]$  with MeCN.** An NMR tube containing a  $\text{CD}_2\text{Cl}_2$  solution of  $5\mathbf{c}[\mathbf{B}(\mathbf{C}_6\mathbf{F}_5)_4]$  (0.020 mmol) was frozen at  $-196\text{ }^\circ\text{C}$  and MeCN (0.040 mmol) was added by vacuum transfer. The tube was warmed to  $-78\text{ }^\circ\text{C}$ , agitated to mix the components, placed in an NMR probe that had been pre-cooled to  $-40\text{ }^\circ\text{C}$ , and monitored by NMR.  $^1\text{H}$  NMR spectra showed that after 10 min, 36 % of  $5\mathbf{c}[\mathbf{B}(\mathbf{C}_6\mathbf{F}_5)_4]$  had been converted to  $[4\mathbf{c}\text{-MeCN}][\mathbf{B}(\mathbf{C}_6\mathbf{F}_5)_4]$ . Therefore the tube was warmed to  $0\text{ }^\circ\text{C}$  for 10 min to facilitate the reaction of  $5\mathbf{c}[\mathbf{B}(\mathbf{C}_6\mathbf{F}_5)_4]$  with MeCN. The tube was cooled to  $-40\text{ }^\circ\text{C}$  and  $^1\text{H}$  NMR spectra were recorded and showed that 90 % of  $5\mathbf{c}[\mathbf{B}(\mathbf{C}_6\mathbf{F}_5)_4]$  had been converted to  $[4\mathbf{c}\text{-MeCN}][\mathbf{B}(\mathbf{C}_6\mathbf{F}_5)_4]$ . This species decomposes within a few minutes at  $20\text{ }^\circ\text{C}$ . **Key NMR data for  $[4\mathbf{c}\text{-MeCN}][\mathbf{B}(\mathbf{C}_6\mathbf{F}_5)_4]$ :**  $^1\text{H}$  NMR ( $\text{CD}_2\text{Cl}_2$ ,  $-40\text{ }^\circ\text{C}$ )  $\delta$  7.38-7.24 (m, 6H), 3.49 (m, 1H,  $\text{PdCH}_2\text{CHMe}(\text{OSiMe}_3)$ ), 2.90 (m, 2H,  $\text{CHMe}_2$ ), 2.81 (m, 2H,  $\text{CHMe}_2$ ), 2.22 (s, 3H,  $\text{N}=\text{CMe}$ ), 2.21 (s, 3H,  $\text{N}=\text{CMe}$ ), 1.70 (s, 3H,  $\text{MeCN}$ ), 1.44 (m, 1H,  $\text{PdCHH}'\text{CHMe}(\text{OSiMe}_3)$ ), 1.32 (d,  $J = 7$ , 12H,  $\text{CHMe}_2$ ), 1.25 (m, 1H,  $\text{PdCHH}'\text{CHMe}(\text{OSiMe}_3)$ ), 1.17 (d,  $J = 7$ , 3H,  $\text{CHMe}_2$ ), 1.16 (d,  $J = 7$ , 3H,  $\text{CHMe}_2$ ), 1.12 (3H,  $\text{CHMe}_2$ ), 1.10 (3H,  $\text{CHMe}_2$ , partially obscured by  $\text{Et}_2\text{O}$  resonance), 0.93 (d,  $J = 6$ , 3H,  $\text{PdCH}_2\text{CHMe}(\text{OSiMe}_3)$ ), -0.13 (s, 9H,  $\text{OSiMe}_3$ ). Key  $^1\text{H}$ - $^1\text{H}$  COSY correlations  $\delta/\delta$ : ( $\text{CD}_2\text{Cl}_2$ ,  $-40\text{ }^\circ\text{C}$ ) 3.49 ( $\text{PdCH}_2\text{CHMe}(\text{OSiMe}_3)$ )/1.44 ( $\text{PdCHH}'\text{CHMe}(\text{OSiMe}_3)$ ); 3.49 ( $\text{PdCH}_2\text{CHMe}(\text{OSiMe}_3)$ )/1.25 ( $\text{PdCHH}'\text{CHMe}(\text{OSiMe}_3)$ ); 3.49 ( $\text{PdCH}_2\text{CHMe}(\text{OSiMe}_3)$ )/0.93 ( $\text{PdCH}_2\text{CHMe}(\text{OSiMe}_3)$ ); 1.44 ( $\text{PdCHH}'\text{CHMe}(\text{OSiMe}_3)$ )/1.25 ( $\text{PdCHH}'\text{CHMe}(\text{OSiMe}_3)$ ).  $^{13}\text{C}\{^1\text{H}\}$  NMR ( $\text{CD}_2\text{Cl}_2$ ,  $-60\text{ }^\circ\text{C}$ ):  $\delta$  179.7 ( $\text{N}=\text{CMe}$ ), 172.1 ( $\text{N}=\text{CMe}$ ), 139.4, 139.1, 138.2, 138.0, 137.2, 137.1, 128.6, 127.8, 124.4, 124.3, 123.9, 123.8, 121.6, 68.9 ( $\text{PdCH}_2\text{CHMe}(\text{OSiMe}_3)$ ), 37.9 ( $\text{PdCH}_2\text{CHMe}(\text{OSiMe}_3)$ ), 28.7, 28.5, 25.6, 23.6, 23.4, 23.4, 23.1, 23.0, 22.9, 22.8, 22.7, 22.5, 22.3, 22.0, 19.9, 2.2 ( $\text{MeCN}$ ), -0.4 ( $\text{OSiMe}_3$ ).

#### 6.4 Reaction of 1[B(C<sub>6</sub>F<sub>5</sub>)<sub>4</sub>] with CH<sub>2</sub>=CHOSiMe<sub>2</sub>Ph (2d).

An NMR tube was charged with (α-diimine)PdMeCl (14.0 mg, 0.0249 mmol) and [Li(Et<sub>2</sub>O)<sub>2.8</sub>][B(C<sub>6</sub>F<sub>5</sub>)<sub>4</sub>] (22.0 mg, 0.0246 mmol) and CD<sub>2</sub>Cl<sub>2</sub> (0.4 mL) were added by vacuum transfer at -196 °C. The tube was warmed to 20 °C, shaken vigorously. After 20min, **2d** (0.0224 mmol) were added by syringe at -196 °C under nitrogen. The tube was warmed to 20 °C, shaken vigorously and monitored periodically by NMR. NMR spectrum showed that **5d**[B(C<sub>6</sub>F<sub>5</sub>)<sub>4</sub>] was generated cleanly after 10min at RT. **5d**[B(C<sub>6</sub>F<sub>5</sub>)<sub>4</sub>] converts to PhMe<sub>2</sub>SiOH and 6[B(C<sub>6</sub>F<sub>5</sub>)<sub>4</sub>].<sup>5</sup> PhMe<sub>2</sub>SiOH was slowly converted to PhMe<sub>2</sub>SiOSiMe<sub>2</sub>Ph in CD<sub>2</sub>Cl<sub>2</sub> at RT over 1 week.

The first-order rate constant for consumption of **5d** measured by the disappearance of the PdCMe<sub>2</sub> resonance is  $k_{\beta\text{-OSiMe}_2\text{Ph, obs}} = 5.06(2) \times 10^{-5} \text{ s}^{-1}$  at 20 °C. The actual first-order rate constant  $k_{\beta\text{-OSiPh}_3} = k_{\beta\text{-OSiPh}_3, \text{obs}}(K_{5\text{d}/4\text{d}} + 1) > 1.8 \times 10^{-3} \text{ s}^{-1}$  ( $K_{5\text{d}/4\text{d}} > 20$ ).

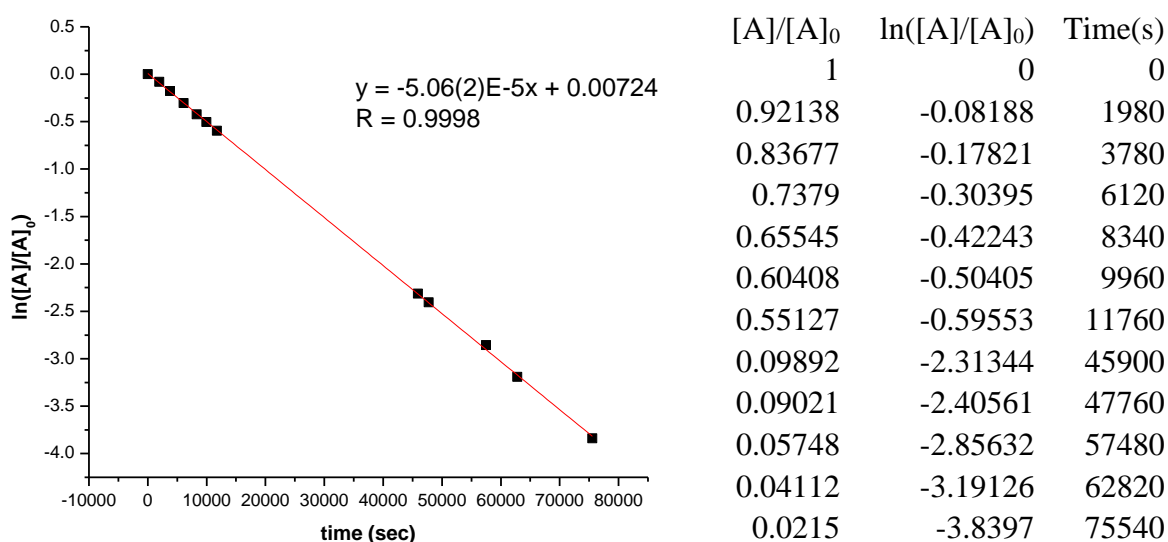

**Figure 6.9.** First-order consumption of **5d**[B(C<sub>6</sub>F<sub>5</sub>)<sub>4</sub>] at 20 °C.



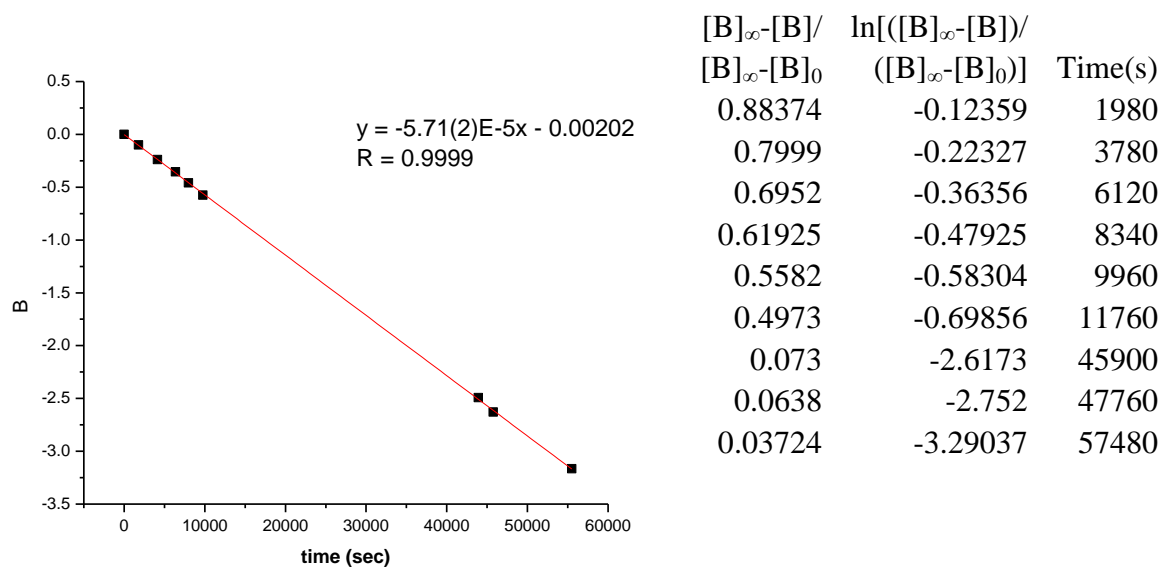

**Figure 6.10.** First-order consumption of **5d**[B(C<sub>6</sub>F<sub>5</sub>)<sub>4</sub>] at 20 °C based on the increase of **6**[B(C<sub>6</sub>F<sub>5</sub>)<sub>4</sub>].  $B = \ln([B]_{\infty}-[B])/([B]_{\infty}-[B]_0)$ .

### 6.5 Reaction of **1**[B(C<sub>6</sub>F<sub>5</sub>)<sub>4</sub>] with CH<sub>2</sub>=CHOSiMePh<sub>2</sub> (**2e**).

An NMR tube was charged with ( $\alpha$ -diimine)PdMeCl (14.0 mg, 0.0249 mmol) and [Li(Et<sub>2</sub>O)<sub>2.8</sub>][B(C<sub>6</sub>F<sub>5</sub>)<sub>4</sub>] (22.0 mg, 0.0246 mmol) and CD<sub>2</sub>Cl<sub>2</sub> (0.4 mL) were added by vacuum transfer at -196 °C. The tube was warmed to 20 °C, shaken vigorously. After 20min, **2e** (0.0242 mmol) were added by syringe at -196 °C under nitrogen. The tube was warmed to 20 °C, shaken vigorously and monitored periodically by NMR. NMR spectrum showed that **5e**[B(C<sub>6</sub>F<sub>5</sub>)<sub>4</sub>] was generated cleanly after 10min at RT. **5e**[B(C<sub>6</sub>F<sub>5</sub>)<sub>4</sub>] converts to Ph<sub>2</sub>MeSiOH and **6**[B(C<sub>6</sub>F<sub>5</sub>)<sub>4</sub>].<sup>6</sup> Ph<sub>2</sub>MeSiOH does not react to generate Ph<sub>2</sub>MeSiOSiMePh<sub>2</sub> in CD<sub>2</sub>Cl<sub>2</sub> at RT over 2 weeks.

The first-order rate constant for consumption of **5e** measured by the disappearance of the PdCMe<sub>2</sub> resonance is  $k_{\beta\text{-OSiMePh}_2, \text{obs}} = 1.34(1) \times 10^{-4} \text{ s}^{-1}$  at 20 °C. The actual first-order rate constant  $k_{\beta\text{-OSiPh}_3} = k_{\beta\text{-OSiPh}_3, \text{obs}}(K_{\mathbf{5d/4d}} + 1) > 1.8 \times 10^{-3} \text{ s}^{-1}$  ( $K_{\mathbf{5d/4d}} > 20$ ).

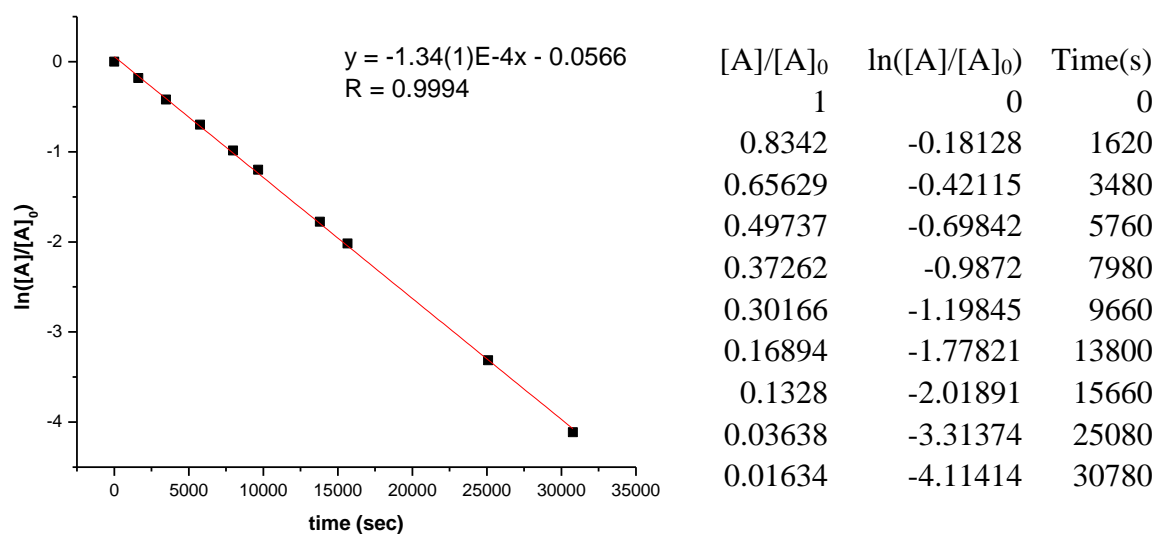

**Figure 6.11.** First-order consumption of **5e**[B(C<sub>6</sub>F<sub>5</sub>)<sub>4</sub>] at 20 °C.

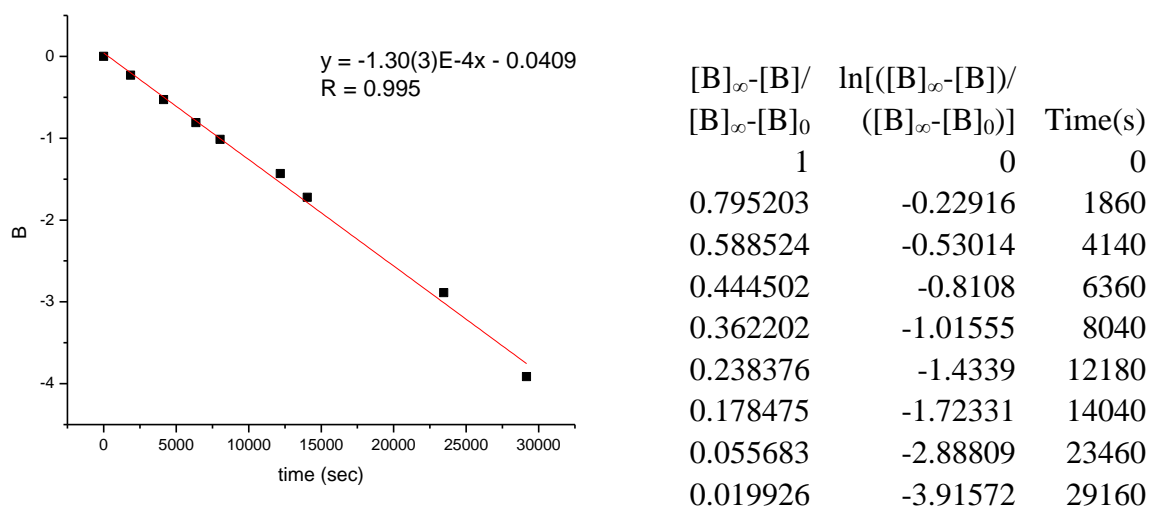

**Figure 6.12.** First-order consumption of **5e**[B(C<sub>6</sub>F<sub>5</sub>)<sub>4</sub>] at 20 °C based on the increase of **6**[B(C<sub>6</sub>F<sub>5</sub>)<sub>4</sub>].  $B = \ln([B]_\infty - [B]) / ([B]_\infty - [B]_0)$ .

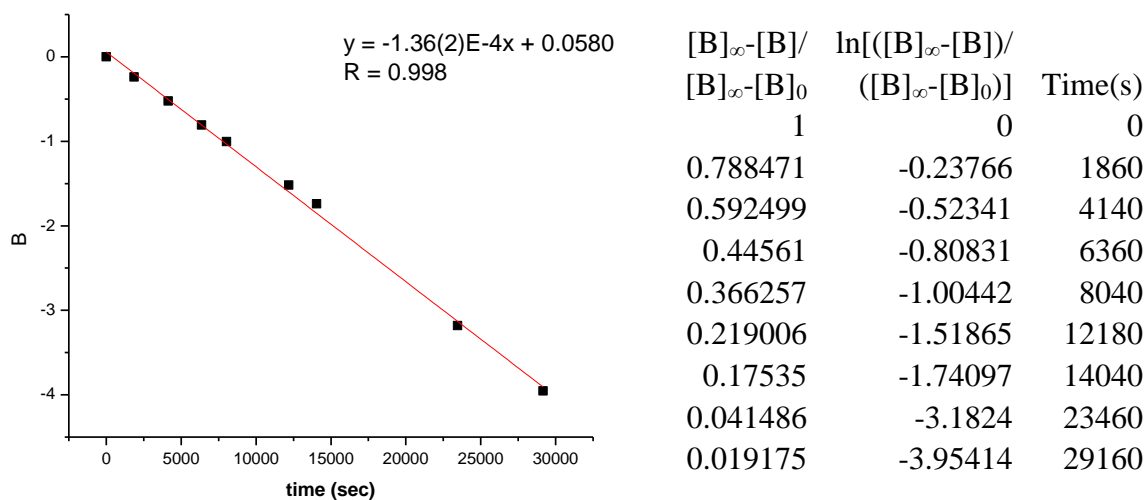

**Figure 6.13.** First-order consumption of **5e**[B(C<sub>6</sub>F<sub>5</sub>)<sub>4</sub>] at 20 °C based on the increase of Ph<sub>2</sub>MeSiOH.  $B = \ln\left(\frac{[B]_{\infty}-[B]}{[B]_{\infty}-[B]_0}\right)$ .

**6.6 Reaction of 1[B(C<sub>6</sub>F<sub>5</sub>)<sub>4</sub>] with CH<sub>2</sub>=CHOSiPh<sub>3</sub> (**2f**).** An NMR tube was charged with (α-diimine)PdMeCl (14.0 mg, 0.0249 mmol) and [Li(Et<sub>2</sub>O)<sub>2.8</sub>][B(C<sub>6</sub>F<sub>5</sub>)<sub>4</sub>] (22.0 mg, 0.0246 mmol) and CD<sub>2</sub>Cl<sub>2</sub> (0.4 mL) were added by vacuum transfer at -196 °C. The tube was warmed to 20 °C, shaken vigorously. After 20min, **2f** (0.0232 mmol) were added by syringe at -196 °C under nitrogen. The tube was warmed to 20 °C, shaken vigorously and monitored periodically by NMR. NMR analysis showed that after 10 min at 20 °C, [(α-diimine)PdMe]<sub>2</sub>(μ-Cl)]<sup>+</sup> (14 %), free **2f** (17 %), [(α-diimine)Pd{CMe<sub>2</sub>(OSiPh<sub>3</sub>)}][B(C<sub>6</sub>F<sub>5</sub>)<sub>4</sub>] (**5f**, 64 %) and **6** (2 %) were present. After 20 min the free **2f** was completely consumed, and a mixture of [(α-diimine)PdMe]<sub>2</sub>(μ-Cl)]<sup>+</sup> (6 %), **5f** (65 %) and **6** (11 %) was present. The resonances of the elimination product Ph<sub>3</sub>SiOH overlapped with other resonances. But Ph<sub>3</sub>SiOH was isolated by hexanes wash after the elimination, and it does not react to generate Ph<sub>3</sub>SiOSiPh<sub>3</sub> in CD<sub>2</sub>Cl<sub>2</sub> at room temperature over

2 weeks.<sup>7</sup> **ESI-MS:** ( $\alpha$ -diimine)Pd{CMe<sub>2</sub>(OSiPh<sub>3</sub>)}<sup>+</sup> calcd.  $m/z$  = 827.4, found 827.2. **Key NMR Data for 5d:** <sup>1</sup>H NMR (CD<sub>2</sub>Cl<sub>2</sub>)<sup>8</sup>  $\delta$  7.45 (d,  $J$  = 8, H<sub>ortho</sub> of OSiPh<sub>3</sub>), 7.31 (m, OSiPh<sub>3</sub>), 7.28 (m, OSiPh<sub>3</sub>), 3.06 (m, 2H, CHMe<sub>2</sub>), 2.96 (m, 2H, CHMe<sub>2</sub>), 2.25 (s, 3H, N=CMe), 2.11 (s, 3H, N=CMe), 1.35 (d,  $J$  = 7, 6H, CHMe<sub>2</sub>), 1.19 (d,  $J$  = 7, 6H, CHMe<sub>2</sub>), 1.16 (d,  $J$  = 7, 6H, CHMe<sub>2</sub>), 1.13 (d,  $J$  = 7, 6H, CHMe<sub>2</sub>), 0.30 (s, 6H, PdCMe<sub>2</sub>(OSiPh<sub>3</sub>)). <sup>13</sup>C{<sup>1</sup>H} NMR (CD<sub>2</sub>Cl<sub>2</sub>, -40 °C):  $\delta$  175.0 (N=CMe), 172.1 (N=CMe), 142.9, 142.4, 137.1, 136.6, 134.8, 131.4, 128.3, 127.9, 127.7, 124.4, 124.1, 87.2 (PdCMe<sub>2</sub>(OSiPh<sub>3</sub>)), 28.9, 28.6, 26.1, 23.8, 23.5, 22.9, 22.7, 21.6, 19.6. The C<sub>ipso</sub> signal of OSiPh<sub>3</sub> was obscured.

The first-order rate constant for consumption of of **5f** measured by the disappearance of the PdCMe<sub>2</sub> resonance is  $k_{\beta\text{-OSiPh}_3, \text{obs}} = 1.071(5) \times 10^{-4} \text{ s}^{-1}$  at 20 °C. The actual first-order rate constant  $k_{\beta\text{-OSiPh}_3} = k_{\beta\text{-OSiPh}_3, \text{obs}}(K_{5f/4f} + 1) > 1.8 \times 10^{-3} \text{ s}^{-1}$  ( $K_{5f/4f} > 20$ ).

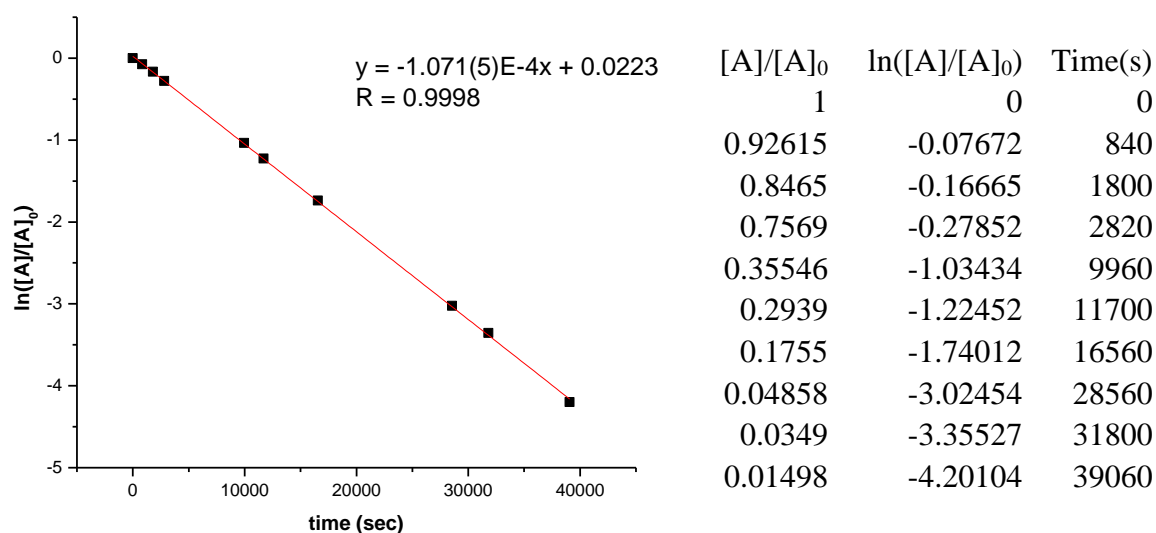

**Figure 6.14.** First-order consumption of **5f**[B(C<sub>6</sub>F<sub>5</sub>)<sub>4</sub>] at 20 °C.

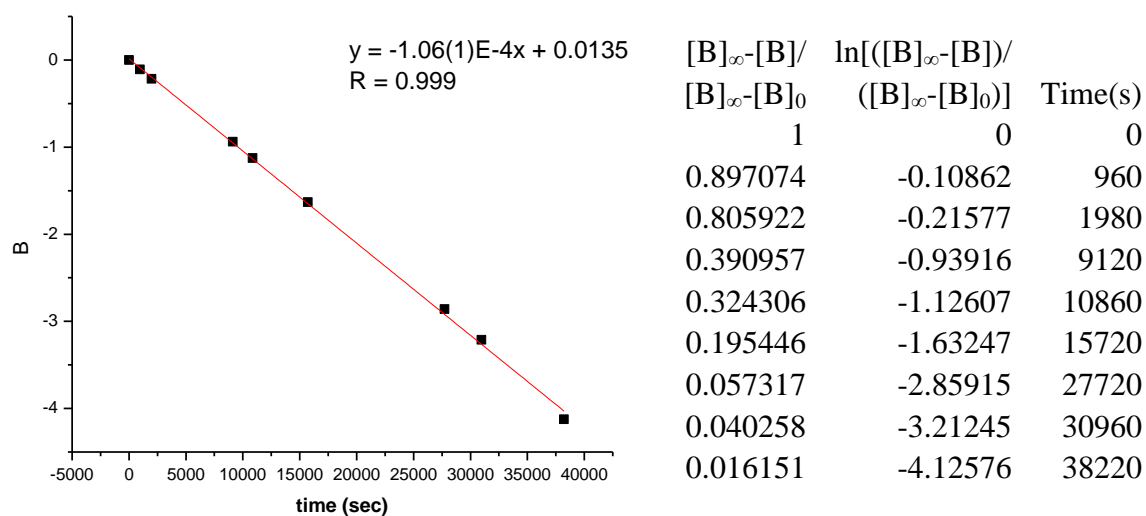

**Figure 6.15.** First-order consumption of **5f**[B(C<sub>6</sub>F<sub>5</sub>)<sub>4</sub>] at 20 °C based on the increase of **6**[B(C<sub>6</sub>F<sub>5</sub>)<sub>4</sub>].  $B = \ln\left(\frac{[B]_{\infty}-[B]}{[B]_{\infty}-[B]_0}\right)$ .

**6.7 Reaction of 5f[B(C<sub>6</sub>F<sub>5</sub>)<sub>4</sub>] with MeCN.** An NMR tube containing a CD<sub>2</sub>Cl<sub>2</sub> solution of **5f**[B(C<sub>6</sub>F<sub>5</sub>)<sub>4</sub>] (0.020 mmol) was frozen at -196 °C and MeCN (0.030 mmol) was added by vacuum transfer. The tube was warmed to -78 °C, agitated to mix the components, placed in an NMR probe that had been pre-cooled to -60 °C, and monitored by NMR. <sup>1</sup>H NMR spectra showed that after 5 min, complex **5f**[B(C<sub>6</sub>F<sub>5</sub>)<sub>4</sub>] had been converted cleanly to **[4f-MeCN]**[B(C<sub>6</sub>F<sub>5</sub>)<sub>4</sub>]. <sup>1</sup>H NMR (CD<sub>2</sub>Cl<sub>2</sub>, -60 °C): δ 7.58 (t, *J* = 8, 3H, H<sub>para</sub> of OSiPh<sub>3</sub>), 7.43 (d, *J* = 7, 6H, H<sub>ortho</sub> of OSiPh<sub>3</sub>), 3.66 (q, *J* = 6, 1H, PdCH<sub>2</sub>CHMe(OSiPh<sub>3</sub>)), 2.92 (sept, *J* = 7, 1H, CHMe<sub>2</sub>), 2.75 (m, 3H, CHMe<sub>2</sub>), 2.23 (s, 3H, N=CMe), 2.21 (s, 3H, N=CMe), 1.99 (br s, MeCN), 1.40 (m, 1H, PdCHH'CHMe(OSiPh<sub>3</sub>)), 1.31 (d, *J* = 7, 3H, CHMe<sub>2</sub>), 1.23 (d, *J* = 7, 3H, CHMe<sub>2</sub>), 1.15 (d, *J* = 7, 3H, CHMe<sub>2</sub>), 1.14 (d, *J* = 7, 3H, CHMe<sub>2</sub>), 1.12 (d, 6H, CHMe<sub>2</sub>, partially obscured by Et<sub>2</sub>O resonance), 1.05 (d, *J* = 6, 3H, CHMe<sub>2</sub>), 1.04 (d, *J* = 6, 3H, CHMe<sub>2</sub>), 0.99 (d, *J* = 6, 3H, PdCH<sub>2</sub>CHMe(OSiPh<sub>3</sub>)), 0.83 (m, 1H, PdCHH'CHMe(OSiPh<sub>3</sub>)). <sup>13</sup>C{<sup>1</sup>H} NMR

(CD<sub>2</sub>Cl<sub>2</sub>, -60 °C):  $\delta$  179.6 (N=CMe), 172.3 (N=CMe), 139.2, 139.1, 138.2, 137.8, 137.1, 137.0, 135.0, 134.6, 134.3, 129.8, 127.9, 127.7, 127.5, 124.4, 124.3, 123.9, 123.7, 121.0 (CH<sub>3</sub>CN), 71.5 (PdCH<sub>2</sub>CHMe(OSiPh<sub>3</sub>)), 38.9 (PdCH<sub>2</sub>CHMe(OSiPh<sub>3</sub>)), 28.8, 28.7, 28.6, 28.5, 25.1, 23.6, 23.3, 23.12, 23.08, 23.0, 22.8 (2C), 22.6, 22.0, 19.9, 1.1 (MeCN).

**6.8 Reaction of 1[B(C<sub>6</sub>F<sub>5</sub>)<sub>4</sub>] with CH<sub>2</sub>=CHOPh (2g).** An NMR tube was charged with ( $\alpha$ -diimine)PdMeCl (11.1 mg, 0.0198 mmol) and [Li(Et<sub>2</sub>O)<sub>2.8</sub>][B(C<sub>6</sub>F<sub>5</sub>)<sub>4</sub>] (18.4 mg, 0.0206 mmol). CD<sub>2</sub>Cl<sub>2</sub> (0.4 mL) and **2g** (0.021 mmol) were added by vacuum transfer at -196 °C. The tube was warmed to 20 °C, shaken vigorously, and monitored periodically by NMR. NMR analysis showed that after 10 min, **6** and phenol had formed quantitatively.

## 7. Reaction of 1[SbF<sub>6</sub>] with 2a-g.

**7.1 Reaction of 1[SbF<sub>6</sub>] with CH<sub>2</sub>=CHO<sup>t</sup>Bu (2a).** An NMR tube was charged with 1[SbF<sub>6</sub>] (14.9 mg, 0.0178 mmol) and **2a** (0.0325 mmol). CD<sub>2</sub>Cl<sub>2</sub> was added by vacuum transfer at -196 °C. <sup>1</sup>H NMR spectrum at -60 °C confirmed the formation of **3a**[SbF<sub>6</sub>]. The tube was kept at 0 °C for 10 min. All the volatiles were evacuated and CD<sub>2</sub>Cl<sub>2</sub> (0.4 mL) was added by vacuum transfer at -196 °C. The tube was warmed to 0 °C and monitored by <sup>1</sup>H NMR periodically. Complex **3a**[SbF<sub>6</sub>] was converted to **4a**[SbF<sub>6</sub>] and **5a**[SbF<sub>6</sub>]. The NMR resonances of **4a**[SbF<sub>6</sub>] and **5a**[SbF<sub>6</sub>] is very similar to **4a**[B(C<sub>6</sub>F<sub>5</sub>)<sub>4</sub>] and **5a**[B(C<sub>6</sub>F<sub>5</sub>)<sub>4</sub>]. The first-order rate constant for the consumption of **3a**[SbF<sub>6</sub>] measured by the disappearance of the PdMe <sup>1</sup>H NMR resonance is  $k_{\text{insert, 3e}} = 3.29(2) \times 10^{-5} \text{ s}^{-1}$  at 0 °C. After **3a**[SbF<sub>6</sub>] is fully consumed, the tube was warmed to 20 °C and monitored by <sup>1</sup>H NMR periodically. NMR analysis showed a mixture of **4a**[SbF<sub>6</sub>] (66%), **5a**[SbF<sub>6</sub>] (22%) and **6**[SbF<sub>6</sub>] (12%) was present after 5min. The first-order rate constant for the consumption of **3a**[SbF<sub>6</sub>] measured by the

disappearance of the PdMe  $^1\text{H}$  NMR resonance is  $k_{\text{insert}, \mathbf{3c}} = 3.29(2) \times 10^{-5} \text{ s}^{-1}$  at 0 °C and  $k_{\text{insert}, \mathbf{3c}} = 6.33(5) \times 10^{-4} \text{ s}^{-1}$  at 20 °C. The first-order rate constant for consumption of the total of  $\mathbf{4a}[\text{SbF}_6]$  and  $\mathbf{5a}[\text{SbF}_6]$  measured by the disappearance of the PdCH<sub>2</sub>CHMe resonance of  $\mathbf{4a}[\text{SbF}_6]$  and the PdCMe<sub>2</sub> resonance of  $\mathbf{5a}[\text{SbF}_6]$  is  $k_{\beta\text{-OtBu, obs}} = 1.50(2) \times 10^{-5} \text{ s}^{-1}$  at 20 °C.

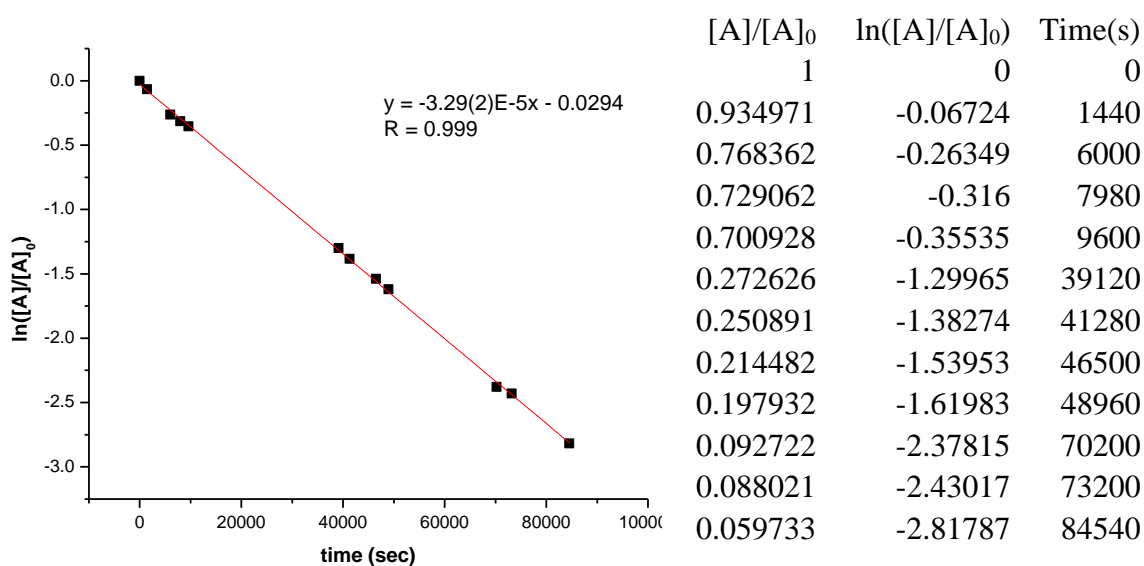

**Figure 7.1.** First-order consumption of  $\mathbf{3a}[\text{SbF}_6]$  at 0 °C.

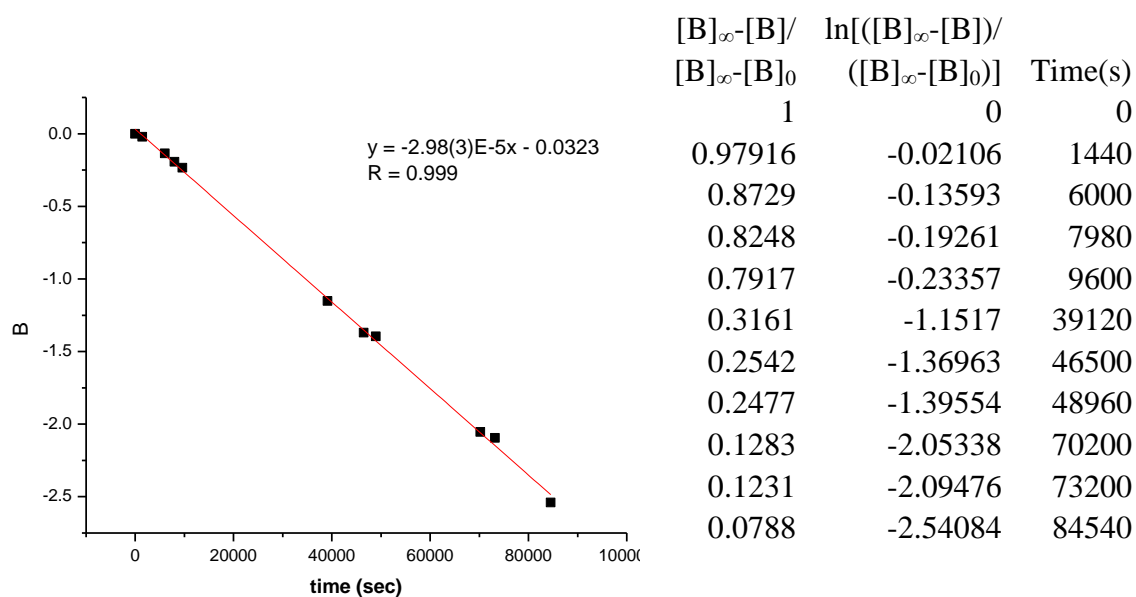

**Figure 7.2.** First-order consumption of **3a**[SbF<sub>6</sub>] at 0 °C based on increase of the sum of **4a**[SbF<sub>6</sub>] + **5a**[SbF<sub>6</sub>].  $B = \ln\left(\frac{[B]_{\infty}-[B]}{[B]_{\infty}-[B]_0}\right)$ .

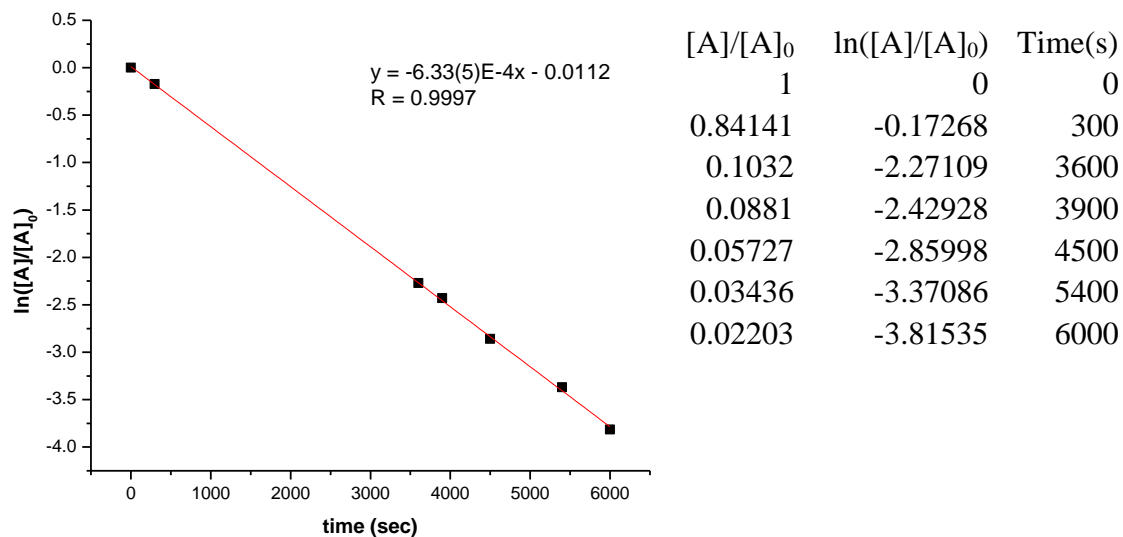

**Figure 7.3.** First-order consumption of **3a**[SbF<sub>6</sub>] at 20 °C.



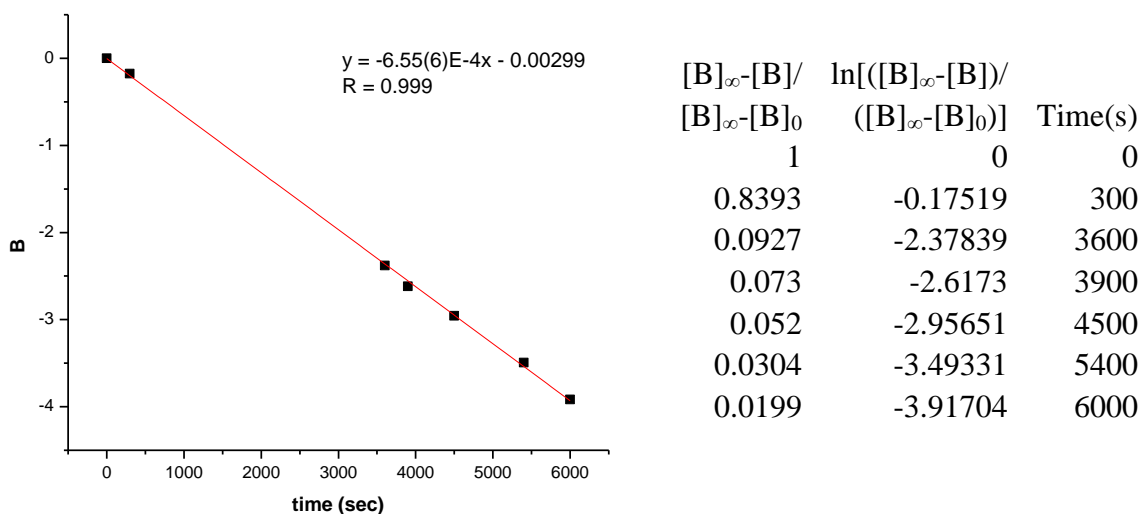

**Figure 7.4.** First-order consumption of **3a**[SbF<sub>6</sub>] at 20 °C based on the increase of the sum of **4a**[SbF<sub>6</sub>] + **5a**[SbF<sub>6</sub>] + **6**[SbF<sub>6</sub>].  $B = \ln([B]_{\infty}-[B])/([B]_{\infty}-[B]_0)$ .

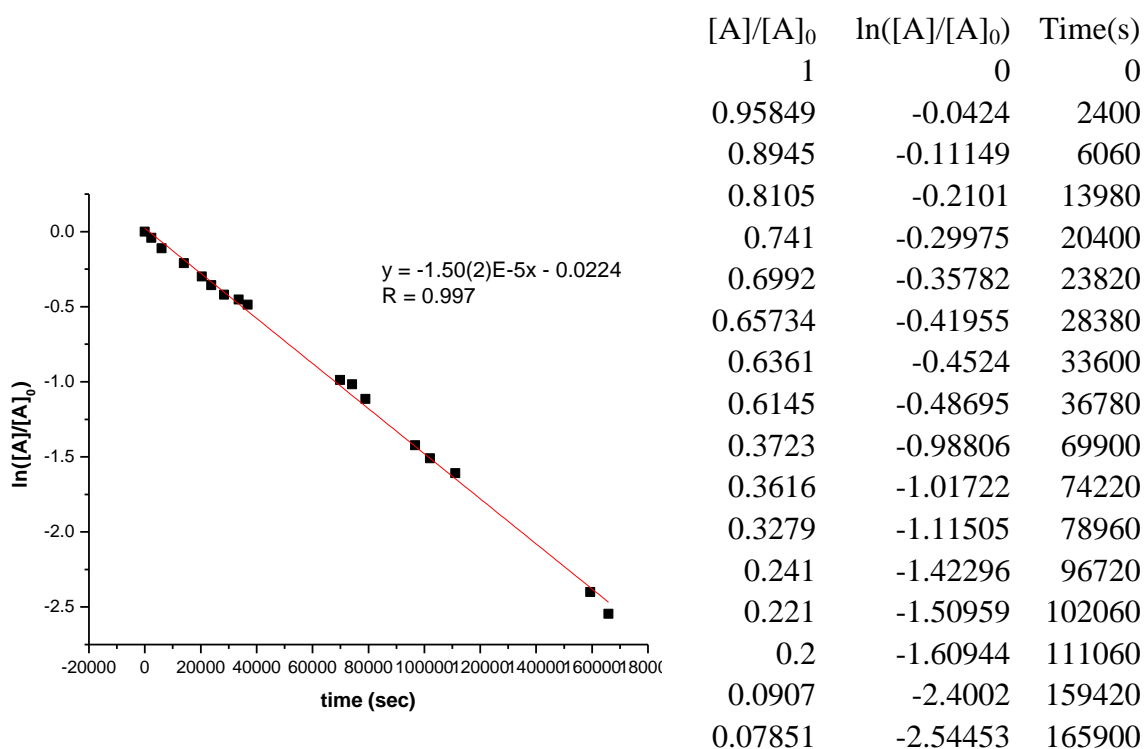

**Figure 7.5.** First-order consumption of the sum of **4a**[SbF<sub>6</sub>] + **5a**[SbF<sub>6</sub>] at 20 °C.

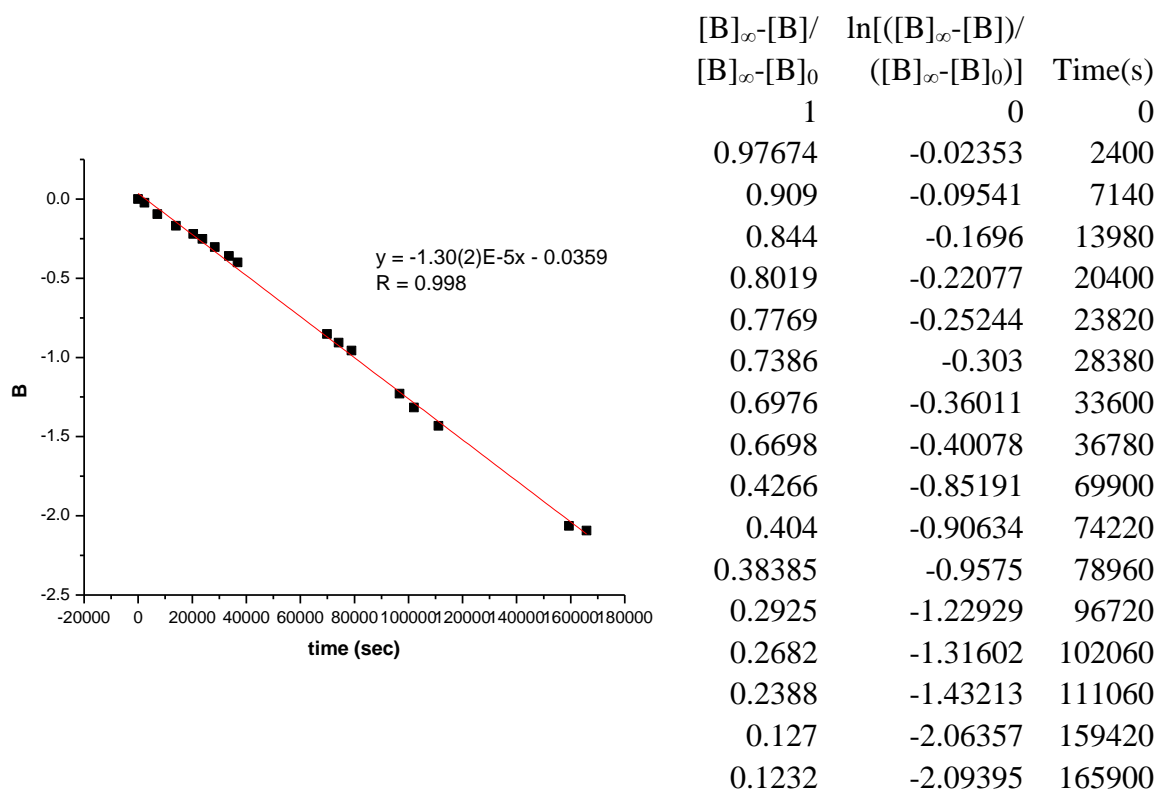

**Figure 7.6.** First-order consumption of the sum of **4a**[SbF<sub>6</sub>] + **5a**[SbF<sub>6</sub>] at 20 °C based on increase of **6**[SbF<sub>6</sub>].  $B = \ln\left(\frac{[B]_{\infty}-[B]}{[B]_{\infty}-[B]_0}\right)$ .

**7.2 Reaction of 1[SbF<sub>6</sub>] with CH<sub>2</sub>=CHOEt (2b).** An NMR tube was charged with **1**[SbF<sub>6</sub>] (14.9 mg, 0.0178 mmol) and **2b** (0.0325 mmol). CD<sub>2</sub>Cl<sub>2</sub> was added by vacuum transfer at -196 °C. A <sup>1</sup>H NMR spectrum at -60 °C confirmed the formation of **3b**[SbF<sub>6</sub>]. The tube was kept at 0 °C for 10 min. All the volatiles were evacuated and CD<sub>2</sub>Cl<sub>2</sub> (0.4 mL) was added by vacuum transfer at -196 °C. The tube was warmed to 0 °C and monitored by <sup>1</sup>H NMR periodically. Complex **3b**[SbF<sub>6</sub>] was converted to **4b**[SbF<sub>6</sub>] and **5b**[SbF<sub>6</sub>]. The NMR resonances of **4b**[SbF<sub>6</sub>] and **5b**[SbF<sub>6</sub>] is very similar to **4b**[B(C<sub>6</sub>F<sub>5</sub>)<sub>4</sub>] and **5b**[B(C<sub>6</sub>F<sub>5</sub>)<sub>4</sub>]. The first-order rate constant for the consumption of **3b**[SbF<sub>6</sub>] measured by the disappearance of the PdMe <sup>1</sup>H NMR resonance is  $k_{\text{insert, 3c}} = 8.41(6) \times 10^{-5} \text{ s}^{-1}$  at 0 °C. After **3b**[SbF<sub>6</sub>] is fully consumed, the tube was warmed to 20 °C and monitored by <sup>1</sup>H NMR periodically. NMR analysis showed a mixture of **4b**[SbF<sub>6</sub>] (13%), **5b**[SbF<sub>6</sub>] (27%) and **6**[SbF<sub>6</sub>] (60%) was present

after 5min. The first-order rate constant for consumption of the total of **4a**[SbF<sub>6</sub>] and **5a**[SbF<sub>6</sub>] measured by the disappearance of the PdCH<sub>2</sub>CHMe resonance of **4b**[SbF<sub>6</sub>] and the PdCMe<sub>2</sub> resonance of **5b**[SbF<sub>6</sub>] is  $k_{\beta\text{-OtBu, obs}} = 1.200(8) \times 10^{-3} \text{ s}^{-1}$  at 20 °C. The first-order rate constant for the consumption of **3b**[SbF<sub>6</sub>] estimated by the disappearance of the PdMe <sup>1</sup>H NMR resonance is  $k_{\text{insert, 3c}} = \sim 2.7 \times 10^{-3} \text{ s}^{-1}$  at 20 °C (ca. 56% consumption after 5min).

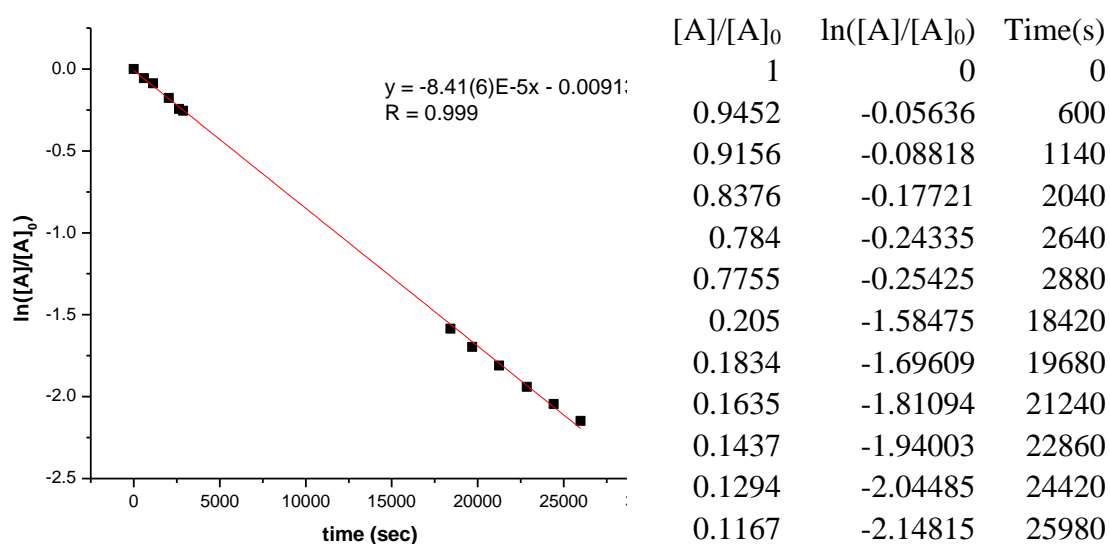

**Figure 7.7.** First-order consumption of **3b**[SbF<sub>6</sub>] at 0 °C.

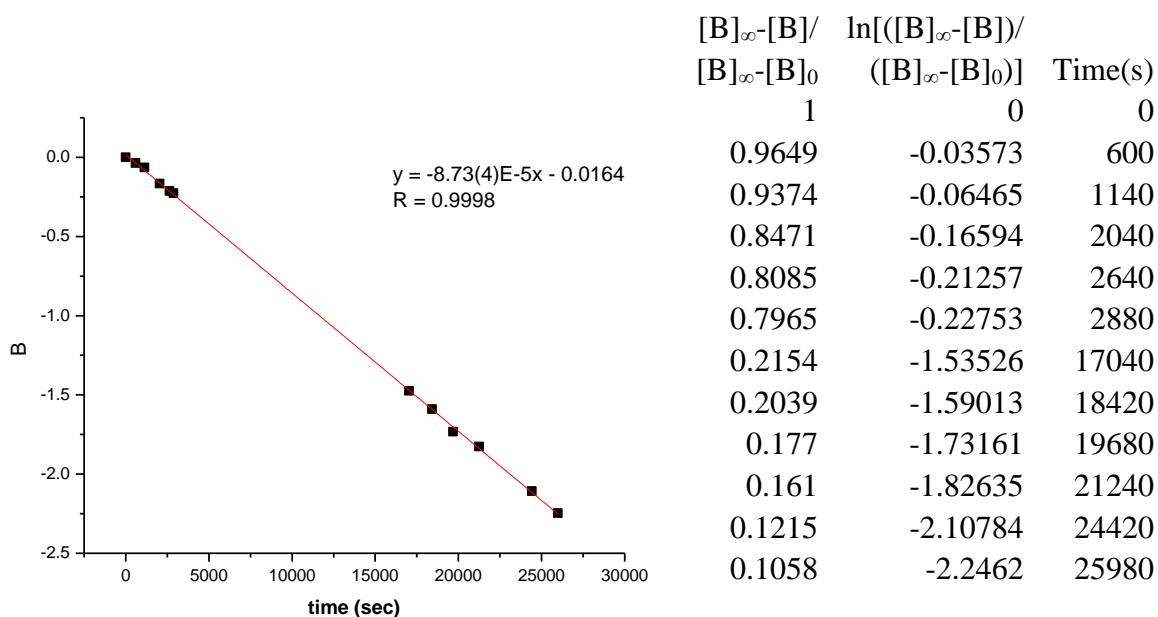

**Figure 7.8.** First-order consumption of **3b**[SbF<sub>6</sub>] at 0 °C based on increase of the sum of **4b**[SbF<sub>6</sub>] + **5b**[SbF<sub>6</sub>] + **6**[SbF<sub>6</sub>].  $B = \ln\left(\frac{[B]_{\infty}-[B]}{[B]_{\infty}-[B]_0}\right)$ .

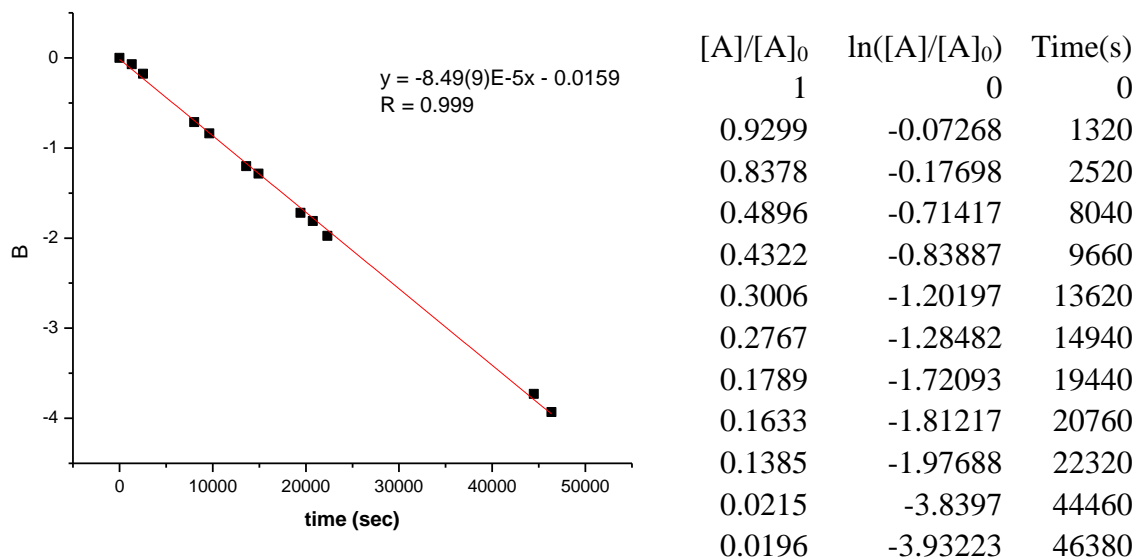

**Figure 7.9.** First-order consumption of the sum of **4b**[SbF<sub>6</sub>] + **5b**[SbF<sub>6</sub>] at 0 °C.  $B = \ln\left(\frac{[B]_{\infty}-[B]}{[B]_{\infty}-[B]_0}\right)$ .

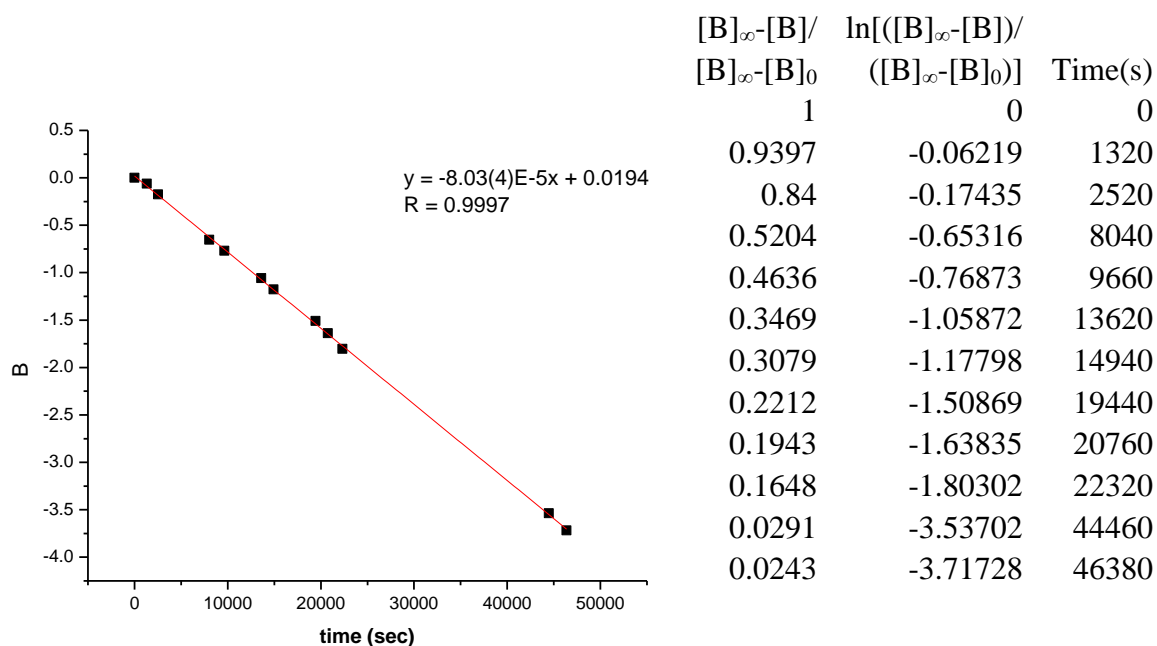

**Figure 7.10.** First-order consumption of the sum of **4b**[SbF<sub>6</sub>] + **5b**[SbF<sub>6</sub>] at 0 °C based on increase of **6**[SbF<sub>6</sub>].  $B = \ln\left(\frac{[B]_{\infty}-[B]}{[B]_{\infty}-[B]_0}\right)$ .

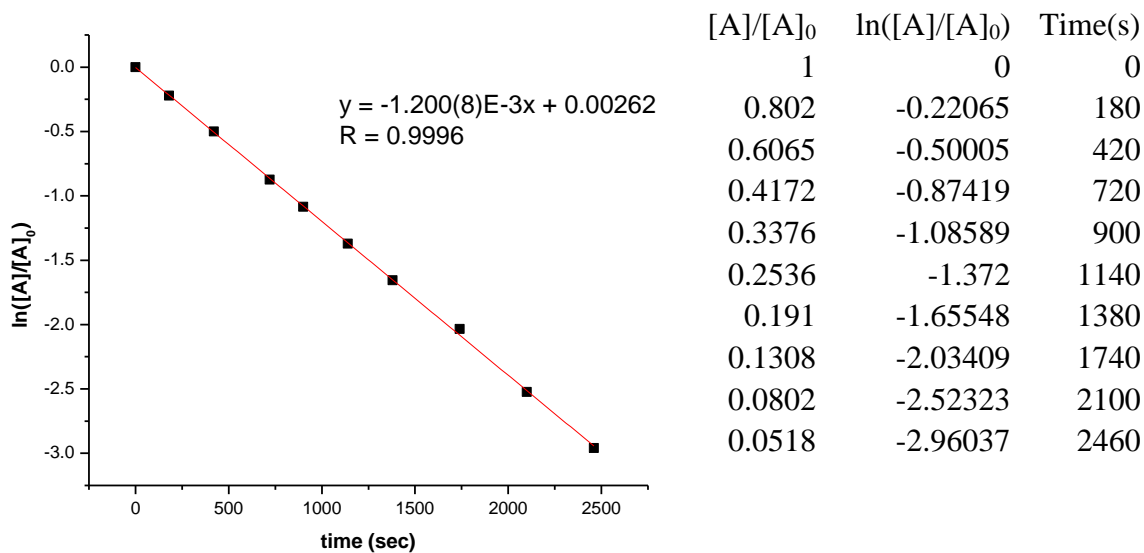

**Figure 7.11.** First-order consumption of the sum of **4b**[SbF<sub>6</sub>] + **5b**[SbF<sub>6</sub>] at 20 °C.

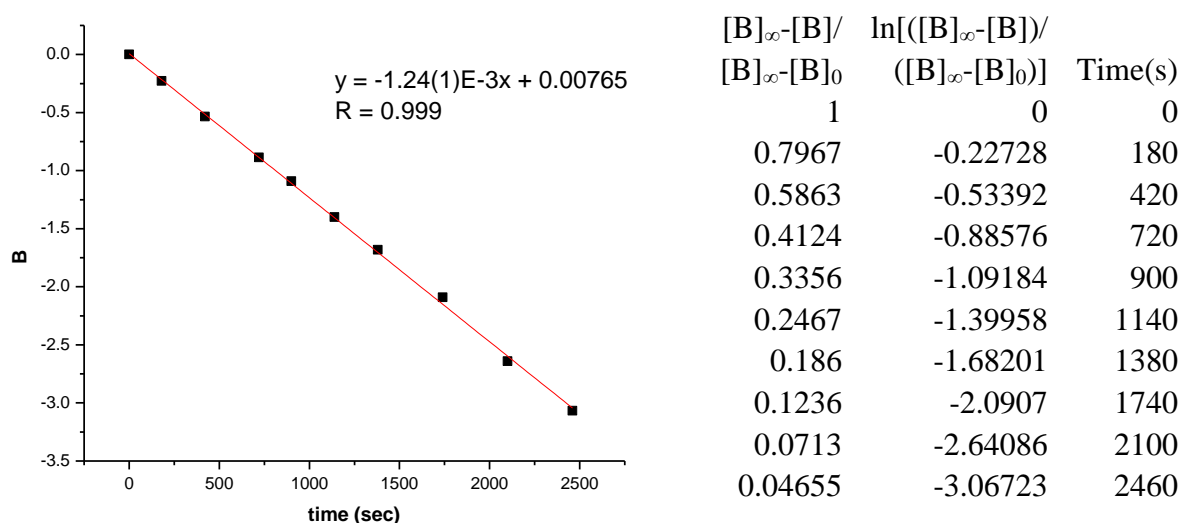

**Figure 7.12.** First-order consumption of the sum of **4b**[SbF<sub>6</sub>] + **5b**[SbF<sub>6</sub>] at 20 °C based on increase of **6**[SbF<sub>6</sub>].  $B = \ln\left(\frac{[B]_{\infty}-[B]}{[B]_{\infty}-[B]_0}\right)$ .

### 7.3 Simulation of the concentration data for the reaction of **1**[SbF<sub>6</sub>] with **2b**.

The first-order rate constant for the consumption of **3b**[SbF<sub>6</sub>] measured by the disappearance of the PdMe <sup>1</sup>H NMR resonance is  $k_{\text{insert}, \mathbf{3b}} = 8.41(6) \times 10^{-5} \text{ s}^{-1}$  at 0 °C. The first-order rate constant for consumption of the total of **4b**[SbF<sub>6</sub>] and **5b**[SbF<sub>6</sub>] measured by the disappearance of the PdCH<sub>2</sub>CHMe resonance of **4b**[SbF<sub>6</sub>] and the PdCMe<sub>2</sub> resonance of **5b**[SbF<sub>6</sub>] is  $k_{\beta\text{-OtBu, obs}} = 2.65(3) \times 10^{-5} \text{ s}^{-1}$  at 0 °C. By using these two rate constants, simulation<sup>9</sup> was performed to demonstrate the change in concentrations of **3b**[SbF<sub>6</sub>], **4b**[SbF<sub>6</sub>], **5b**[SbF<sub>6</sub>] and **6**[SbF<sub>6</sub>] over time. The simulated data agree very well with the experimental data. Similarly, the comparison between the simulated data and the experimental data was carried out for the B(C<sub>6</sub>F<sub>5</sub>)<sub>4</sub> anion, which also shows good agreement.

Based on the simulation results, it is concluded that the rate constants determined from the experimental data are very reliable. The comparison of the  $k_{\text{insert}, \mathbf{3b}}$  between SbF<sub>6</sub> anion

and  $\text{B}(\text{C}_6\text{F}_5)_4$  anion both at 0 °C and at 20 °C showed that the anion only has minimal affect on the insertion rate (Table 2, 3). The similar comparison of the  $k_{\text{insert}, 3\text{a}}$  gave the same conclusion.

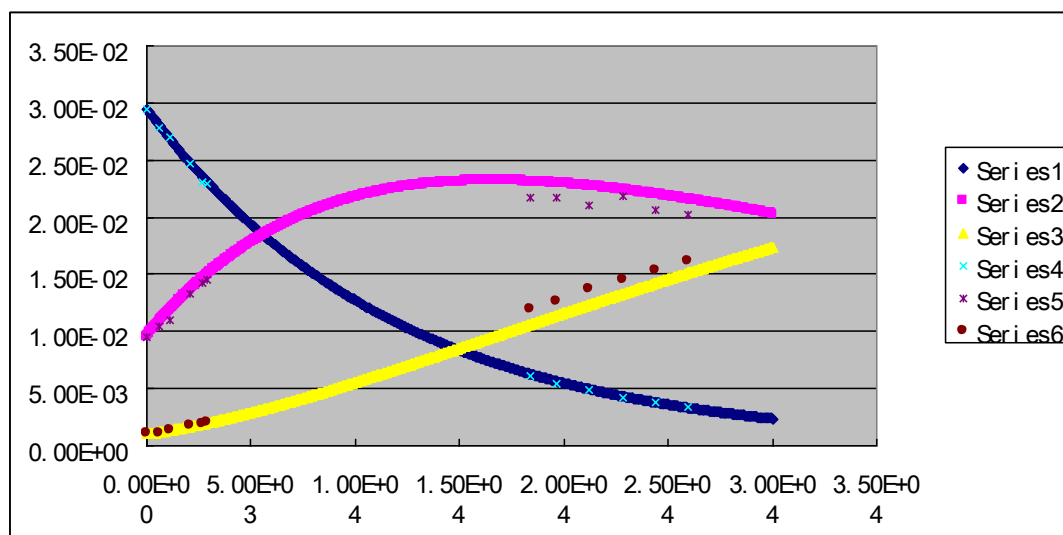

**Figure 7.13.** The experimental and simulated concentration vs time plot for  $\text{SbF}_6^-$  anion. Series 1-3 are the simulated concentration of **3b**, **4b+5b** and **6** over time, by using  $k_{\text{insert},3} = 8.41 \times 10^{-5} \text{ s}^{-1}$ , and  $k_{\beta\text{-OR}, \text{obs}} = 2.65 \times 10^{-5} \text{ s}^{-1}$ . Series 4-6 are the experimental concentration of **3b**, **4b+5b** and **6** over time.

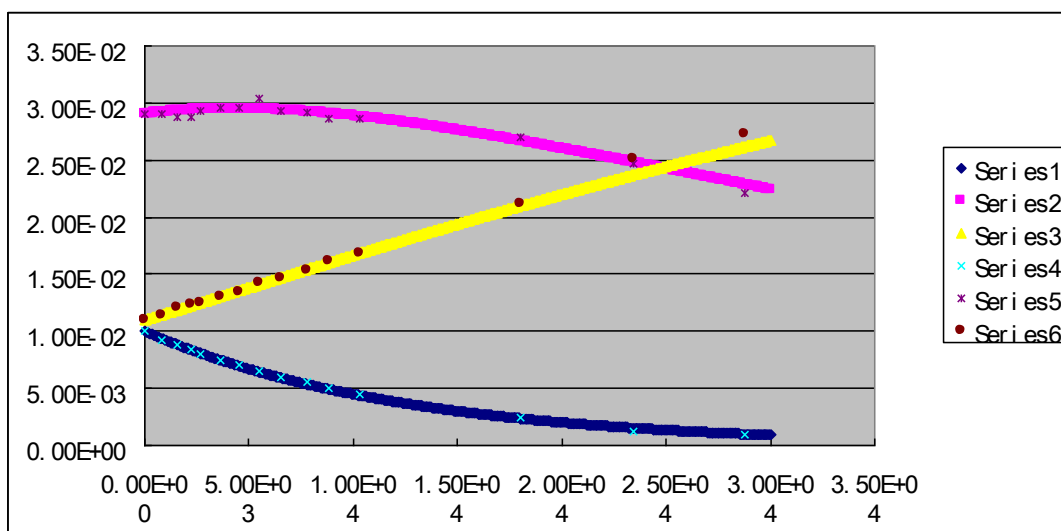

**Figure 7.14.** The experimental and simulated concentration vs time plot for  $\text{B}(\text{C}_6\text{F}_5)_4$  anion. Series 1-3 are the simulated concentration of **3b**, **4b+5b** and **6** over time, by using  $k_{\text{insert},3} = 8.01 \times 10^{-5} \text{ s}^{-1}$ , and  $k_{\beta\text{-OR, obs}} = 1.94 \times 10^{-5} \text{ s}^{-1}$ . Series 4-6 are the experimental concentration of **3b**, **4b+5b** and **6** over time.

**7.4 Reaction of 1[SbF<sub>6</sub>] with CH<sub>2</sub>=CHOSiMe<sub>3</sub> (2c).** An NMR tube was charged with **1**[SbF<sub>6</sub>] (14.9 mg, 0.0178 mmol) and **2c** (0.027 mmol). CD<sub>2</sub>Cl<sub>2</sub> was added by vacuum transfer at -196 °C. A <sup>1</sup>H NMR spectrum at -60 °C confirmed the formation of **3c**[SbF<sub>6</sub>]. The tube was warmed to 0 °C and monitored by <sup>1</sup>H NMR periodically. Complex **3c**[SbF<sub>6</sub>] was converted to **5c**[SbF<sub>6</sub>]. The NMR resonances of **5c**[SbF<sub>6</sub>] is very similar to **5c**[B(C<sub>6</sub>F<sub>5</sub>)<sub>4</sub>]. The first-order rate constant for the consumption of **3c**[SbF<sub>6</sub>] measured by the disappearance of the PdMe <sup>1</sup>H NMR resonance is  $k_{\text{insert}, 3c} = 1.645(7) \times 10^{-4} \text{ s}^{-1}$  at 0 °C. After **3c**[SbF<sub>6</sub>] is fully consumed, the tube was warmed to 20 °C and monitored by <sup>1</sup>H NMR periodically. Complex **5c**[SbF<sub>6</sub>] was converted to **6**[SbF<sub>6</sub>]. The first-order rate constant for consumption of **5c**[SbF<sub>6</sub>] measured by the disappearance of the PdCMe<sub>2</sub> resonance is  $k_{\beta\text{-OSiMe}_3, \text{obs}} = 1.11(2) \times 10^{-4} \text{ s}^{-1}$  at 20 °C.



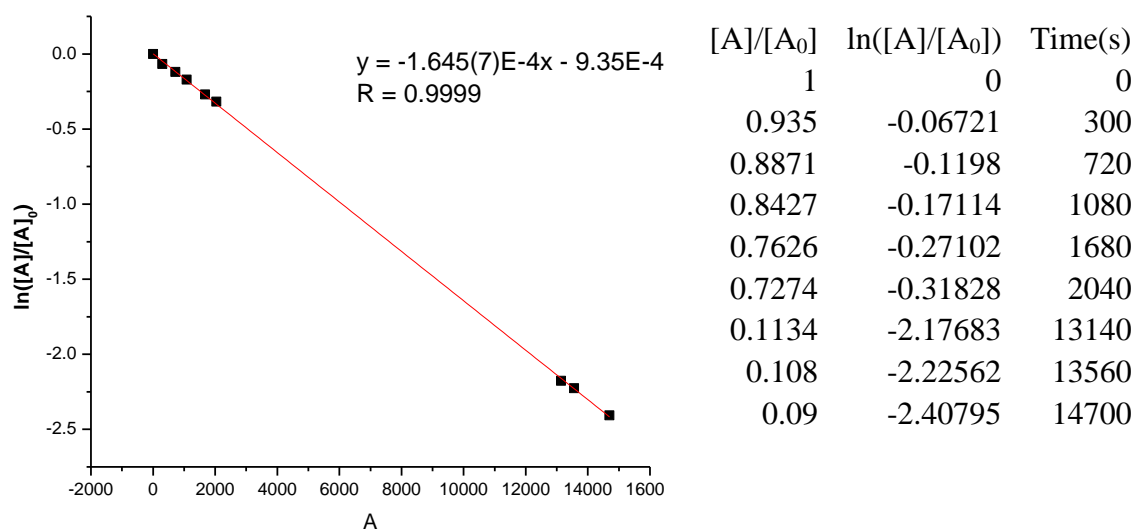

**Figure 7.15.** First-order consumption of **3c**[SbF<sub>6</sub>] at 0 °C.

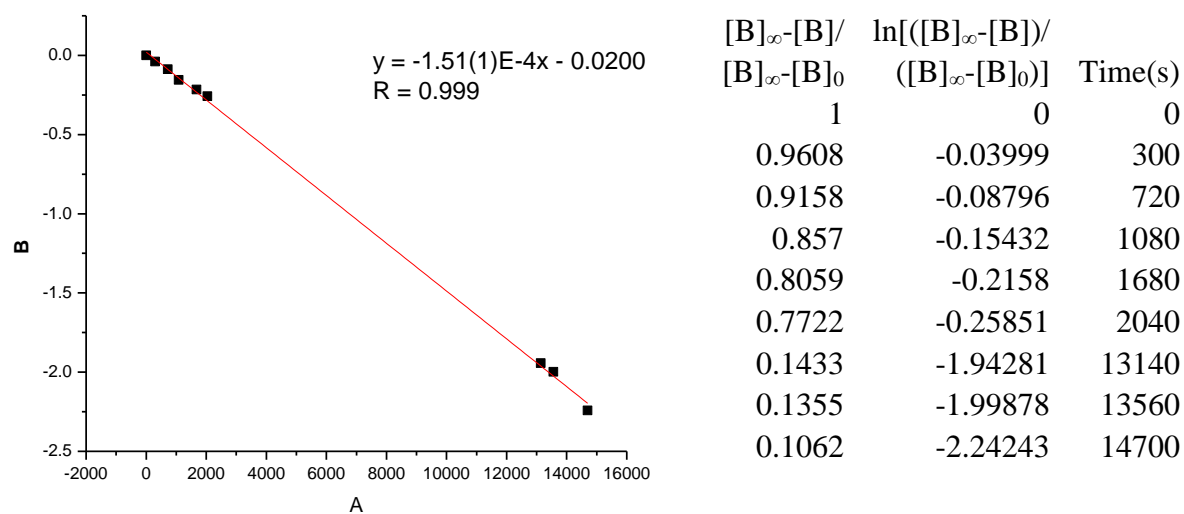

**Figure 7.16.** First-order consumption of **3c**[SbF<sub>6</sub>] at 0 °C based on increase of **4c**[SbF<sub>6</sub>]. B =

$\ln\left(\frac{[B]_{\infty}-[B]}{[B]_{\infty}-[B]_0}\right)$ .

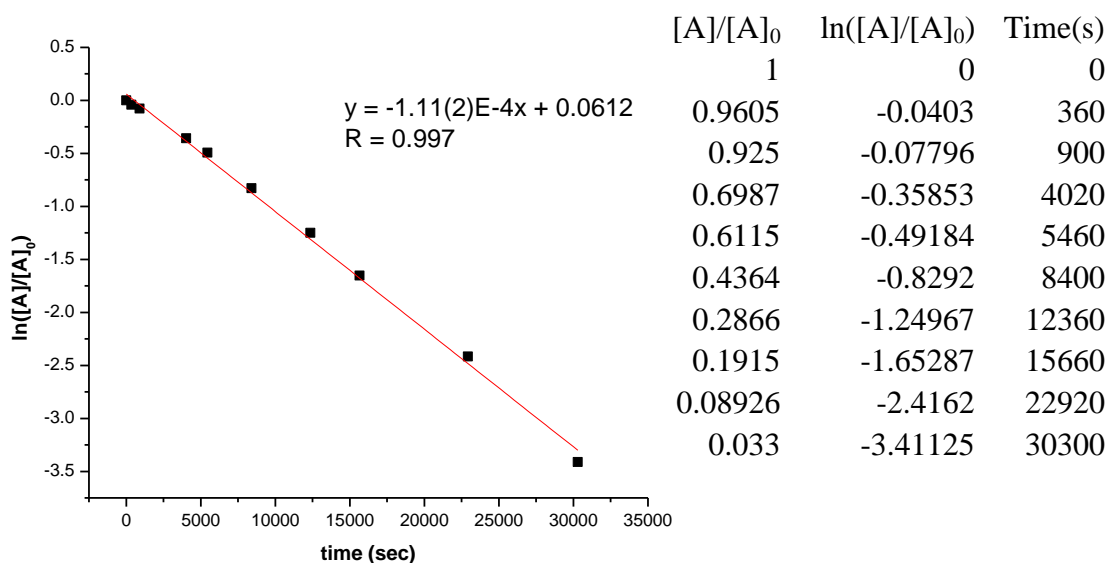

**Figure 7.17.** First-order consumption of **5c**[SbF<sub>6</sub>] at 20 °C.

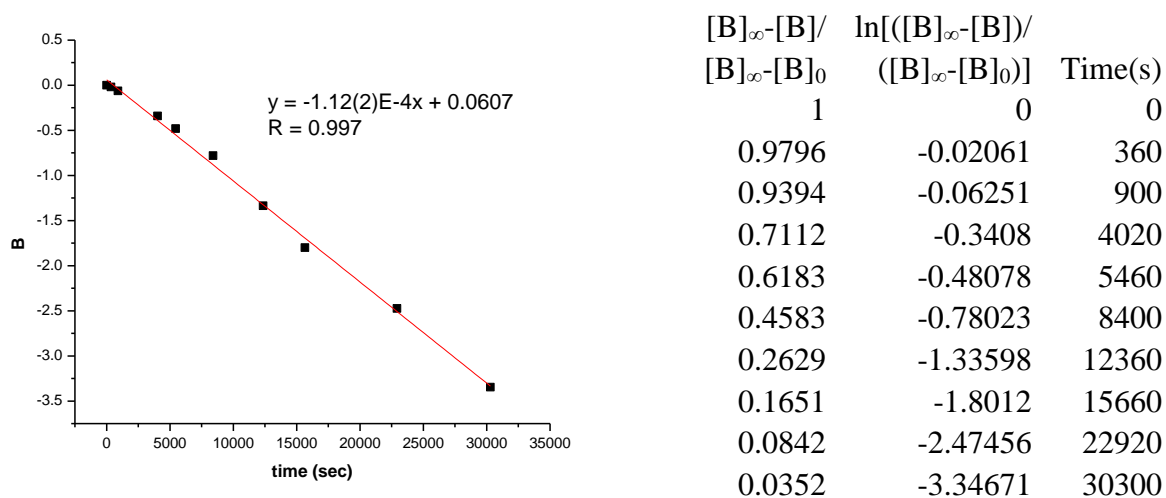

**Figure 7.18.** First-order consumption of **5c**[SbF<sub>6</sub>] at 20 °C based on increase of **6**[SbF<sub>6</sub>]. B =  $\ln([B]_{\infty}-[B])/([B]_{\infty}-[B]_0)$ .

**7.5 Reaction of 1[SbF<sub>6</sub>] with CH<sub>2</sub>=CHOSiMe<sub>2</sub>Ph (2d).** A NMR tube was charged with (α-diimine)PdMeCl (16.3 mg, 29.0 μmol), AgSbF<sub>6</sub> (10 mg, 29.1 μmol) and CH<sub>2</sub>=CHOSiMe<sub>2</sub>Ph (5.2 mg, 29.2 μmol), and CD<sub>2</sub>Cl<sub>2</sub> (0.4 mL) was added by vacuum transfer

S50

at  $-78\text{ }^{\circ}\text{C}$ . The tube was shaken to dissolve and thoroughly mix the components. A  $^1\text{H}$  NMR spectrum at  $-60\text{ }^{\circ}\text{C}$  confirmed the formation of **3d**[SbF<sub>6</sub>]. The tube was warmed to  $0\text{ }^{\circ}\text{C}$  and monitored by  $^1\text{H}$  NMR periodically. Complex **3d**[SbF<sub>6</sub>] was converted to **5d**[SbF<sub>6</sub>]. Key NMR Data for **5d**[SbF<sub>6</sub>]:  $^1\text{H}$  NMR (CD<sub>2</sub>Cl<sub>2</sub>)  $\delta$  3.05 (m, 4H, CHMe<sub>2</sub>), 2.26 (s, 3H, N=CMe), 2.21 (s, 3H, N=CMe), 1.46 (d,  $J = 7$ , 6H, CHMe<sub>2</sub>), 1.38 (d,  $J = 7$ , 6H, CHMe<sub>2</sub>), 1.30 (d,  $J = 7$ , 6H, CHMe<sub>2</sub>), 1.18 (d,  $J = 7$ , 6H, CHMe<sub>2</sub>), 0.38 (s, 6H, PdCMe<sub>2</sub>(OSiMe<sub>2</sub>Ph)), 0.19(s, 6H, SiMe<sub>2</sub>). The first-order rate constant for the consumption of **3d**[SbF<sub>6</sub>] measured by the disappearance of the PdMe  $^1\text{H}$  NMR resonance is  $k_{\text{insert, 3d}} = 3.18(5) \times 10^{-4}\text{ s}^{-1}$  at  $0\text{ }^{\circ}\text{C}$ . After **3d**[SbF<sub>6</sub>] is fully consumed, the tube was warmed to  $20\text{ }^{\circ}\text{C}$  and monitored by  $^1\text{H}$  NMR periodically. Complex **5d**[SbF<sub>6</sub>] was converted to **6**[SbF<sub>6</sub>]. The first-order rate constant for consumption of **5d**[SbF<sub>6</sub>] measured by the disappearance of the PdCMe<sub>2</sub> resonance is  $k_{\beta\text{-OSiMe}_2\text{Ph, obs}} = 1.56(3) \times 10^{-4}\text{ s}^{-1}$  at  $20\text{ }^{\circ}\text{C}$ .

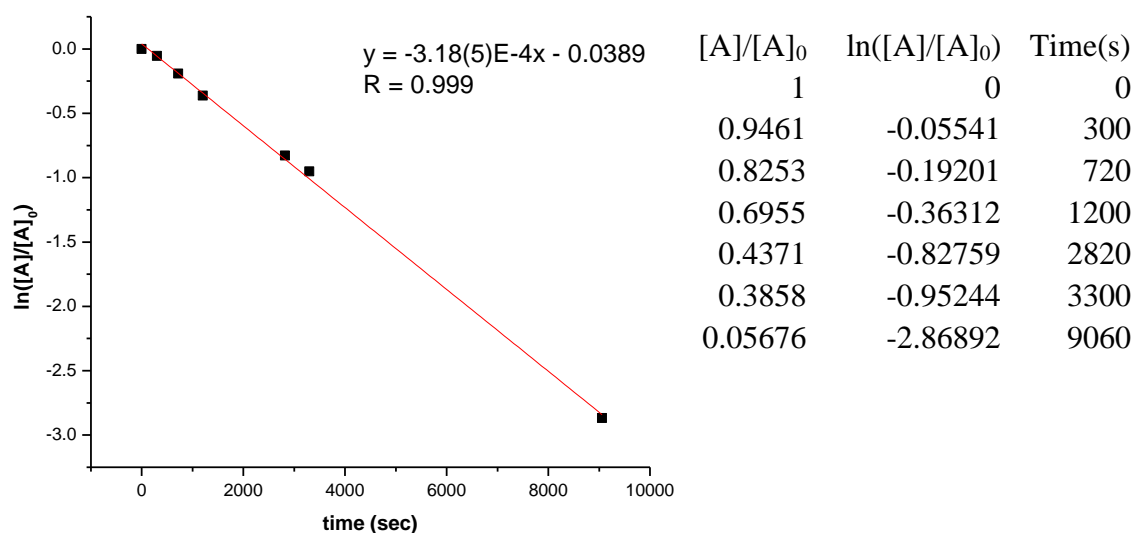

**Figure 7.19.** First-order consumption of **3d**[SbF<sub>6</sub>] at  $0\text{ }^{\circ}\text{C}$ .

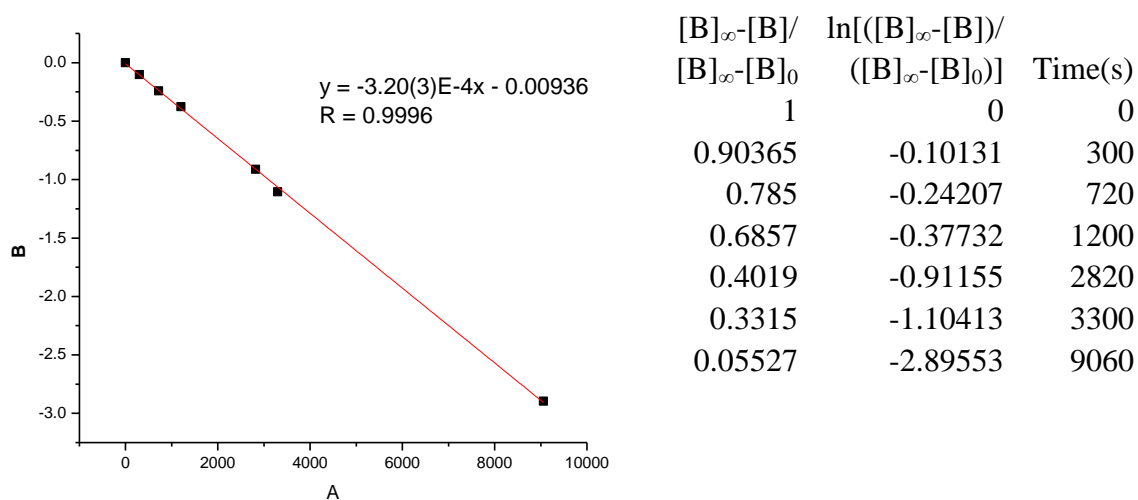

**Figure 7.20.** First-order consumption of **3d**[SbF<sub>6</sub>] at 0 °C based on increase of **4d**[SbF<sub>6</sub>]. B =  $\ln\left(\frac{[B]_{\infty}-[B]}{[B]_{\infty}-[B]_0}\right)$ .

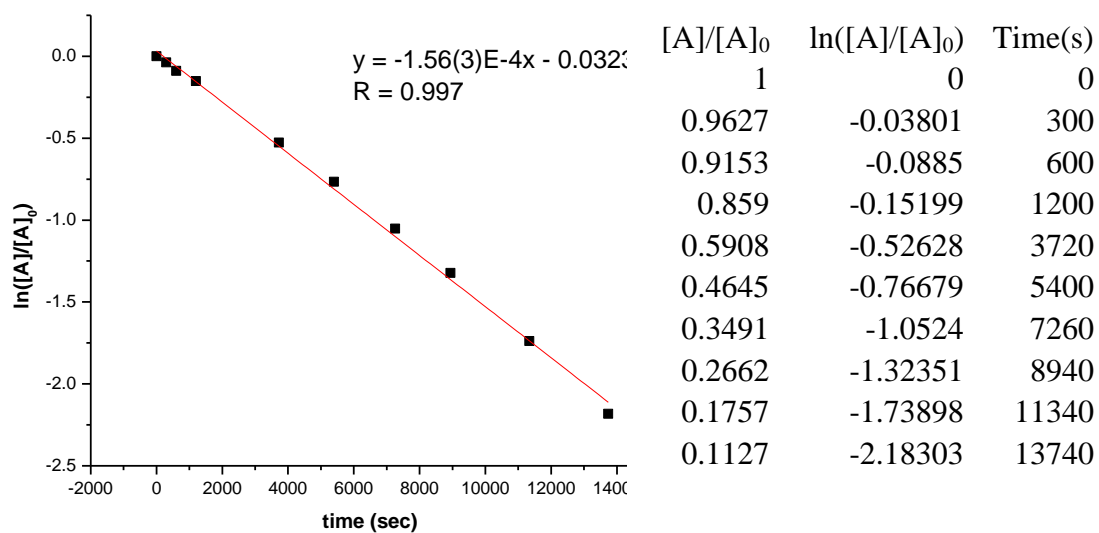

**Figure 7.21.** First-order consumption of **5d**[SbF<sub>6</sub>] at 20 °C.

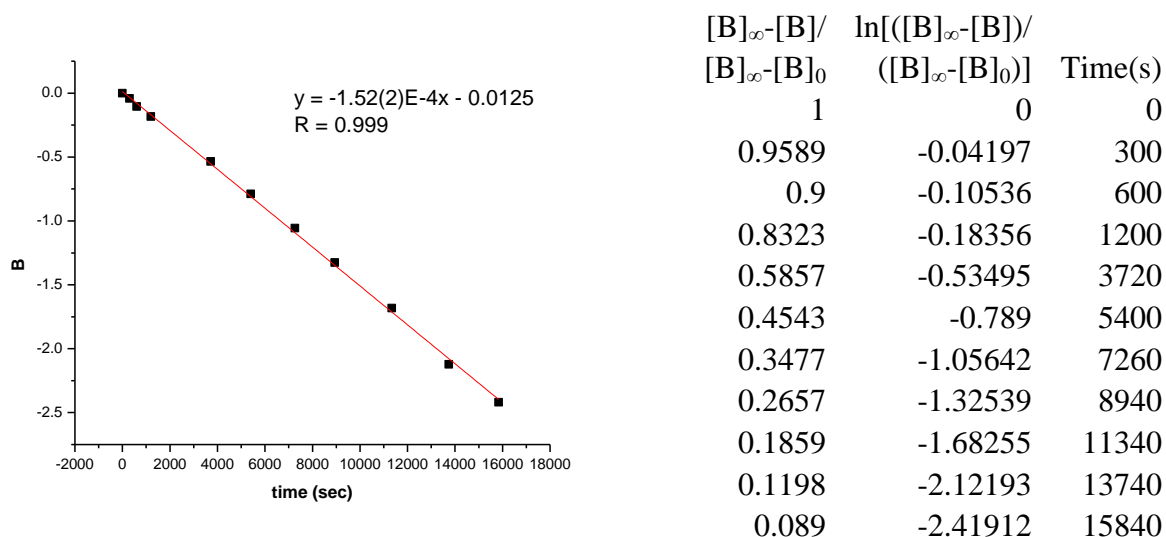

**Figure 7.22.** First-order consumption of **5d**[SbF<sub>6</sub>] at 20 °C based on the increase of **6**[SbF<sub>6</sub>].  $B$

$$= \ln\left(\frac{[B]_{\infty}-[B]}{[B]_{\infty}-[B]_0}\right).$$

**7.6 Reaction of 1[SbF<sub>6</sub>] with CH<sub>2</sub>=CHOSiMePh<sub>2</sub> (2e).** A NMR tube was charged with (α-diimine)PdMeCl (16.3 mg, 29.0 μmol), AgSbF<sub>6</sub> (10 mg, 29.1 μmol) and CH<sub>2</sub>=CHOSiMePh<sub>2</sub> (6.9 mg, 29.1 μmol), and CD<sub>2</sub>Cl<sub>2</sub> (0.4 mL) was added by vacuum transfer at -78 °C. The tube was shaken to dissolve and thoroughly mix the components. A <sup>1</sup>H NMR spectrum at -60 °C confirmed the formation of **3e**[SbF<sub>6</sub>]. The tube was warmed to 0 °C and monitored by <sup>1</sup>H NMR periodically. Complex **3e**[SbF<sub>6</sub>] was converted to **5e**[SbF<sub>6</sub>]. Key NMR Data for **5e**[SbF<sub>6</sub>]: <sup>1</sup>H NMR (CD<sub>2</sub>Cl<sub>2</sub>) δ 3.06 (m, 4H, CHMe<sub>2</sub>), 2.25 (s, 3H, N=CMe), 2.18 (s, 3H, N=CMe), 1.37 (d, *J* = 7, 6H, CHMe<sub>2</sub>), 1.30 (d, *J* = 7, 6H, CHMe<sub>2</sub>), 1.25 (d, *J* = 7, 6H, CHMe<sub>2</sub>), 1.16 (d, *J* = 7, 6H, CHMe<sub>2</sub>), 0.57 (s, 3H, SiMe), 0.34 (s, 6H, PdCMe<sub>2</sub>(OSiMePh<sub>2</sub>)). The first-order rate constant for the consumption of **3e**[SbF<sub>6</sub>] measured by the disappearance of the PdMe <sup>1</sup>H NMR resonance is  $k_{\text{insert}, 3d} = 5.22(7) \times 10^{-4} \text{ s}^{-1}$  at 0 °C. After **3e**[SbF<sub>6</sub>] is fully consumed, the tube was warmed to 20 °C and monitored by <sup>1</sup>H NMR periodically. Complex

**5e**[SbF<sub>6</sub>] was converted to **6**[SbF<sub>6</sub>]. The first-order rate constant for consumption of **5e**[SbF<sub>6</sub>] measured by the disappearance of the PdCMe<sub>2</sub> resonance is  $k_{\beta\text{-OSiMePh}_2, \text{obs}} = 2.46(4) \times 10^{-4} \text{ s}^{-1}$  at 20 °C.

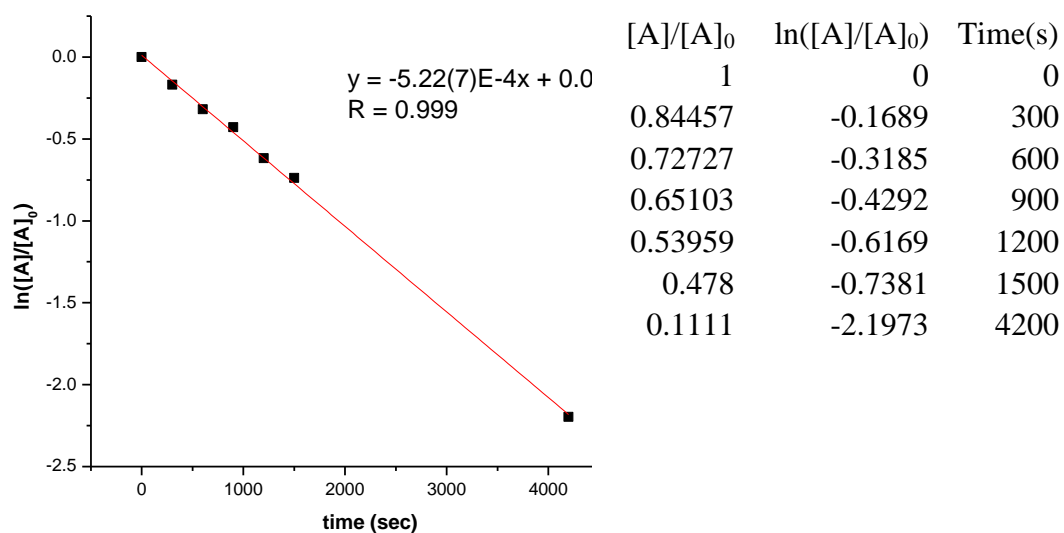

**Figure 7.23.** First-order consumption of **3e**[SbF<sub>6</sub>] at 0 °C.

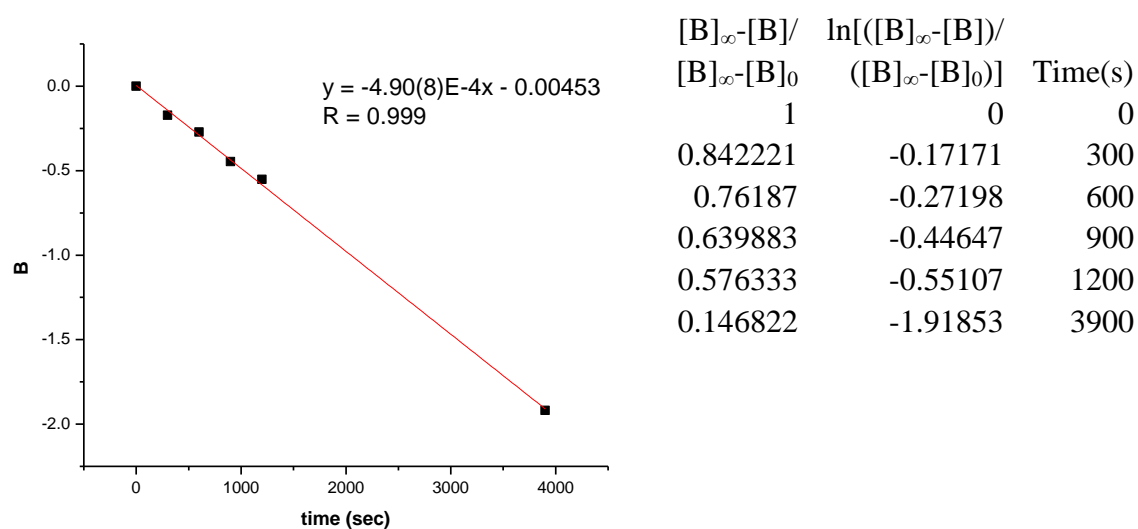

**Figure 7.24.** First-order consumption of  $3e[SbF_6]$  at 0 °C based on increase of  $4e$ .  $B = \ln([B]_{\infty}-[B])/([B]_{\infty}-[B]_0)$ .

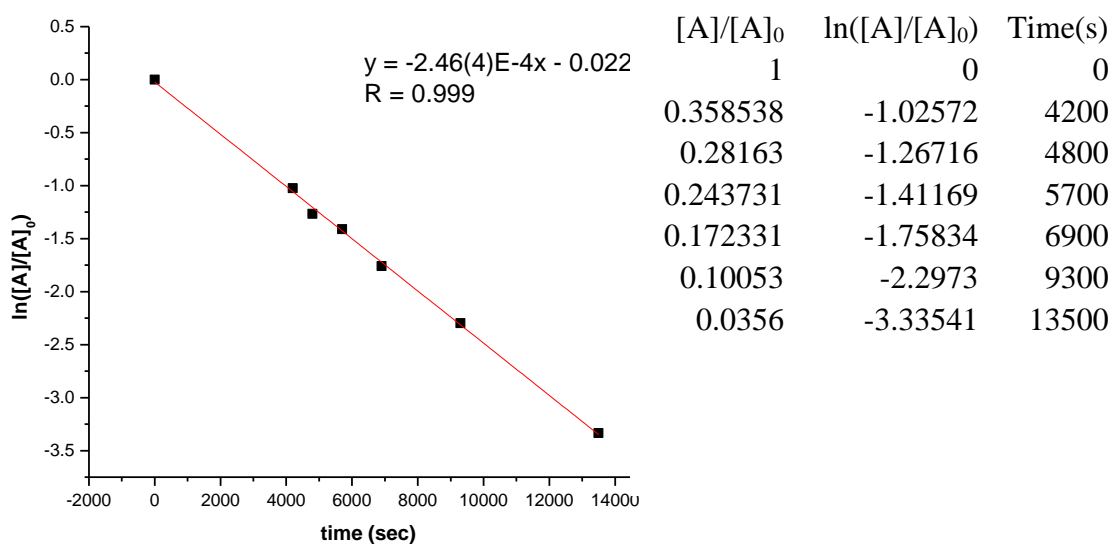

**Figure 7.25.** First-order consumption of  $5e[SbF_6]$  at 20 °C.

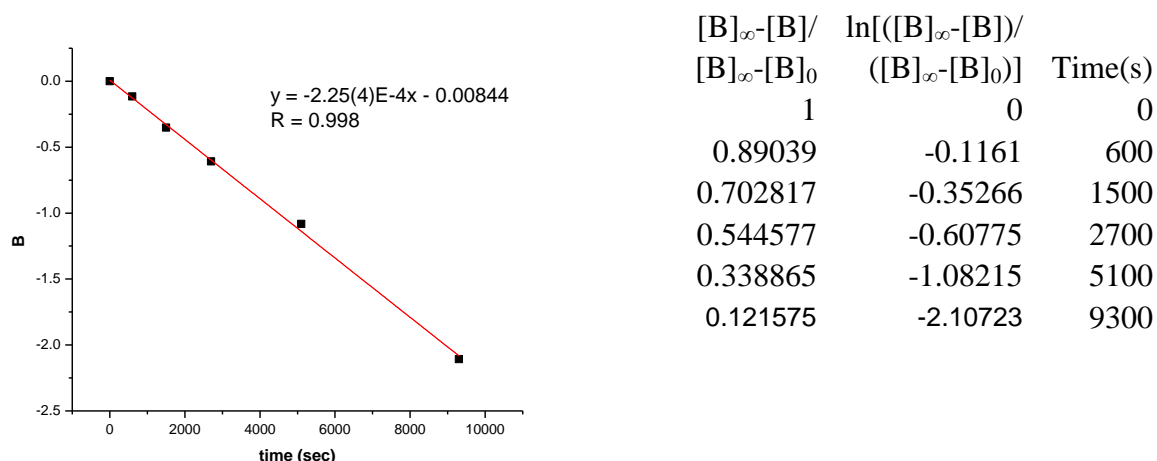

**Figure 7.26.** First-order consumption of **5e**[SbF<sub>6</sub>] at 20 °C based on the increase of **6**[SbF<sub>6</sub>].  $B = \ln\left(\frac{[B]_{\infty}-[B]}{[B]_{\infty}-[B]_0}\right)$ .

**7.7 Reaction of 1[SbF<sub>6</sub>] with CH<sub>2</sub>=CHOSiPh<sub>3</sub> (2f).** A NMR tube was charged with (α-diimine)PdMeCl (16.3 mg, 29.0 μmol), AgSbF<sub>6</sub> (10 mg, 29.1 μmol) and CH<sub>2</sub>=CHOSiPh<sub>3</sub> (8.8 mg, 29.1 μmol), and CD<sub>2</sub>Cl<sub>2</sub> (0.4 mL) was added by vacuum transfer at -78 °C. The tube was shaken to dissolve and thoroughly mix the components. A <sup>1</sup>H NMR spectrum at -60 °C confirmed the formation of **3f**[SbF<sub>6</sub>]. The tube was warmed to 0 °C and monitored by <sup>1</sup>H NMR periodically. Complex **3f**[SbF<sub>6</sub>] was converted to **5f**[SbF<sub>6</sub>]. The NMR resonances of **5f**[SbF<sub>6</sub>] is very similar to **5f**[B(C<sub>6</sub>F<sub>5</sub>)<sub>4</sub>]. The first-order rate constant for the consumption of **3f**[SbF<sub>6</sub>] measured by the disappearance of the H<sub>trans</sub> <sup>1</sup>H NMR resonance is  $k_{\text{insert}, \mathbf{3f}} = 8.06(6) \times 10^{-4} \text{ s}^{-1}$  at 0 °C. After **3f**[SbF<sub>6</sub>] is fully consumed, the tube was warmed to 20 °C and monitored by <sup>1</sup>H NMR periodically. Complex **5f**[SbF<sub>6</sub>] was converted to **6**[SbF<sub>6</sub>]. The first-order rate constant for consumption of **5f**[SbF<sub>6</sub>] measured by the disappearance of the PdCMe<sub>2</sub> resonance is  $k_{\beta\text{-OSiMePh}_2, \text{obs}} = 3.78(1) \times 10^{-4} \text{ s}^{-1}$  at 20 °C.



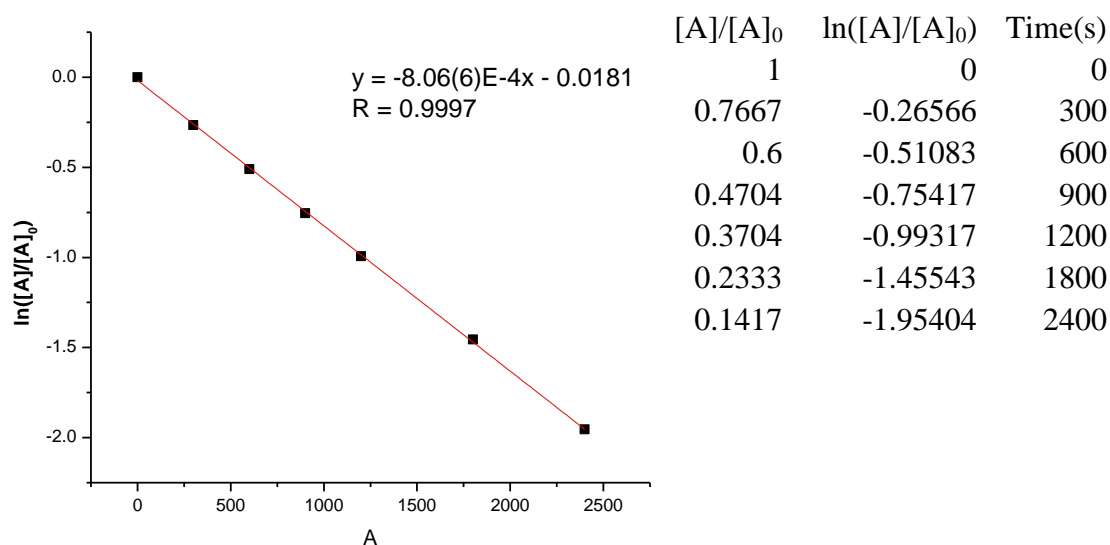

**Figure 7.27.** First-order consumption of **3f**[SbF<sub>6</sub>] at 0 °C.

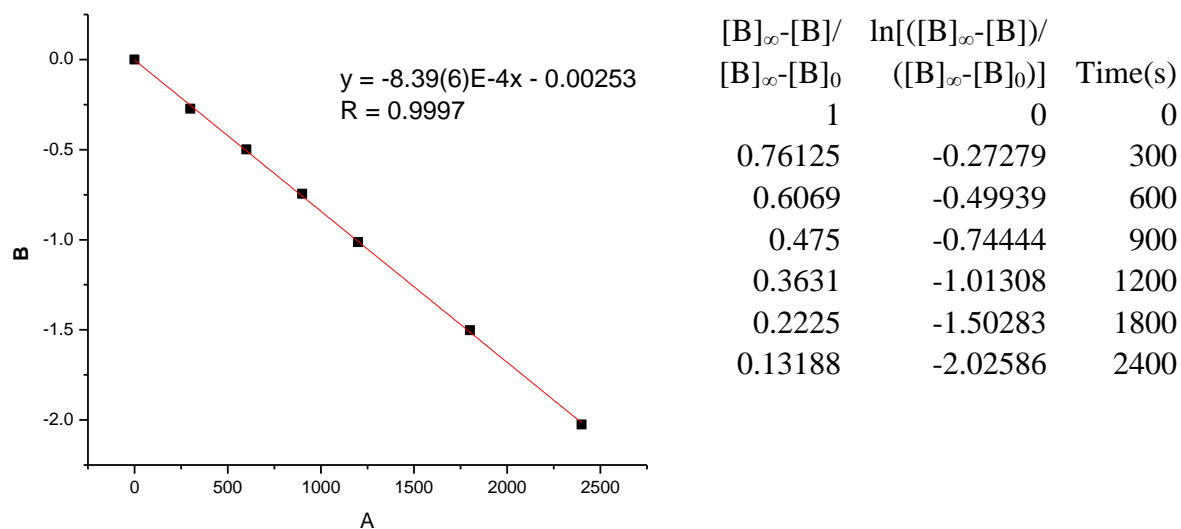

**Figure 7.28.** First-order consumption of **3f**[SbF<sub>6</sub>] at 0 °C based on increase of **4**.  $B = \ln([B]_{\infty}-[B])/([B]_{\infty}-[B]_0)$ .

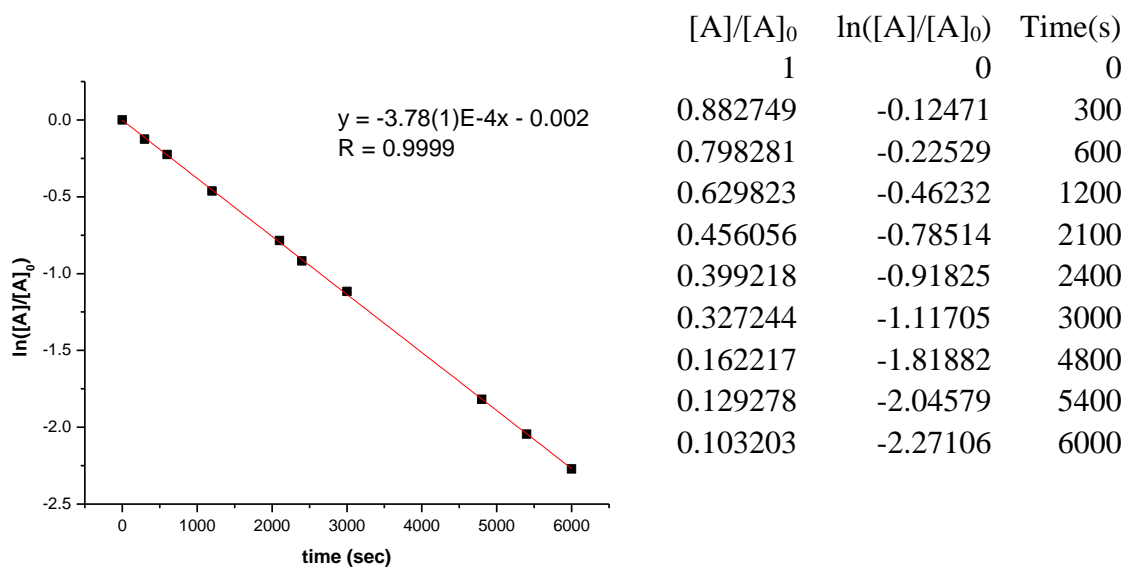

**Figure 7.29.** First-order consumption of **5f**[SbF<sub>6</sub>] at 20 °C.

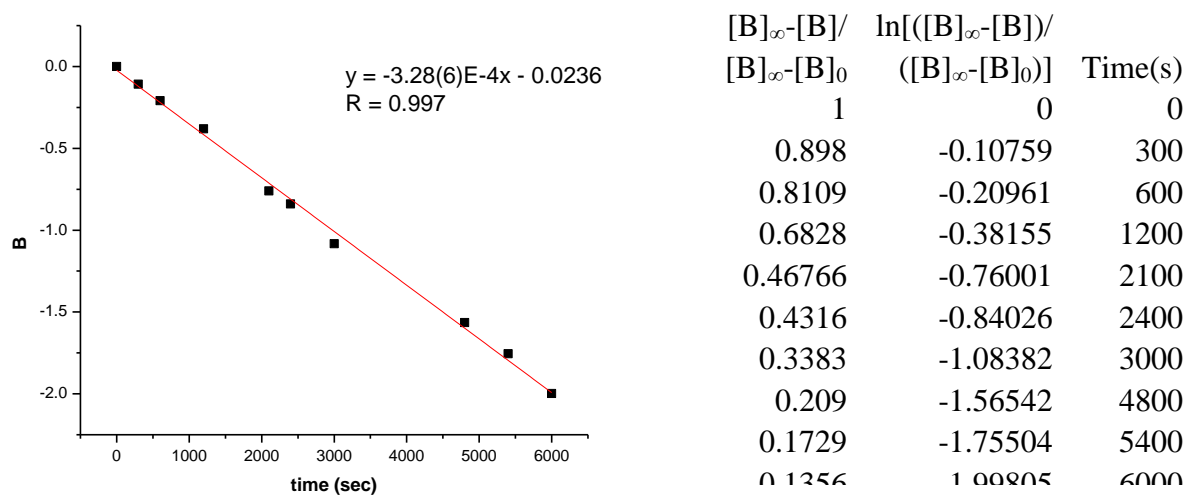

**Figure 7.30.** First-order consumption of **5f**[SbF<sub>6</sub>] at 20 °C based on increase of **6**[SbF<sub>6</sub>].  $B = \ln([(B)_{\infty} - [B]] / [(B)_{\infty} - [B]_0])$ .

**7.8 Insertion of  $[(\alpha\text{-diimine})\text{PdMe}(\text{CH}_2=\text{CHOPh})][\text{SbF}_6]$  (**3g**[SbF<sub>6</sub>]).** An NMR tube was charged with **1**[SbF<sub>6</sub>] (14.6 mg, 0.0176 mmol) and **1g** (0.043 mmol). CD<sub>2</sub>Cl<sub>2</sub> was added by vacuum transfer at -196 °C. The tube was warmed to 0 °C and monitored by <sup>1</sup>H NMR

S58

periodically. Complex **3g**[SbF<sub>6</sub>] was cleanly converted to **6**[SbF<sub>6</sub>]. No intermediates were detected. The first-order rate constant for the consumption of **3g**[SbF<sub>6</sub>] measured by the disappearance of the H<sub>trans</sub> <sup>1</sup>H NMR resonance is  $k_{\text{insert}, 3e} = 1.50(4) \times 10^{-3} \text{ s}^{-1}$  at 0 °C.

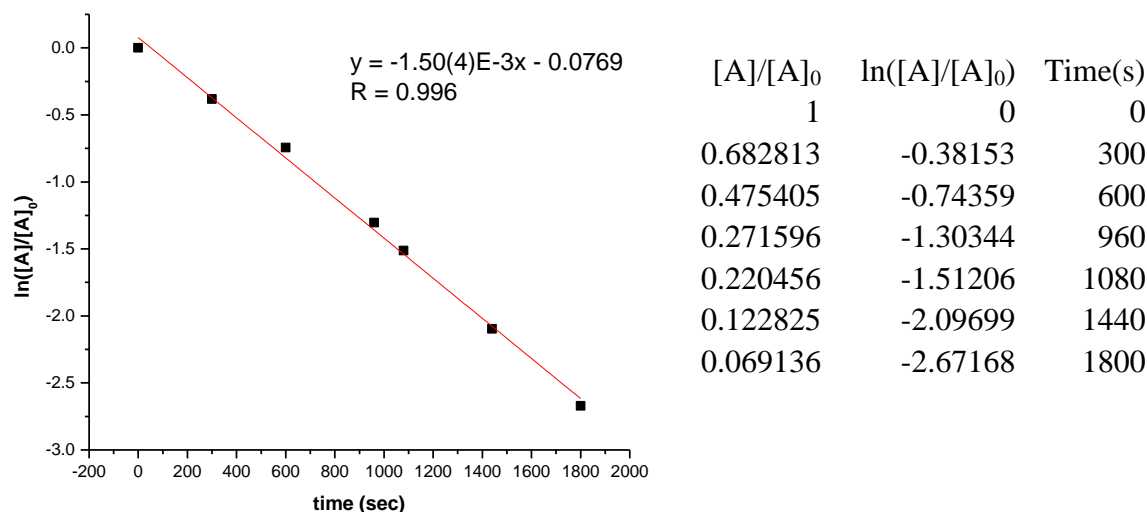

**Figure 7.31.** First-order consumption of **3g**[SbF<sub>6</sub>] at 0 °C.

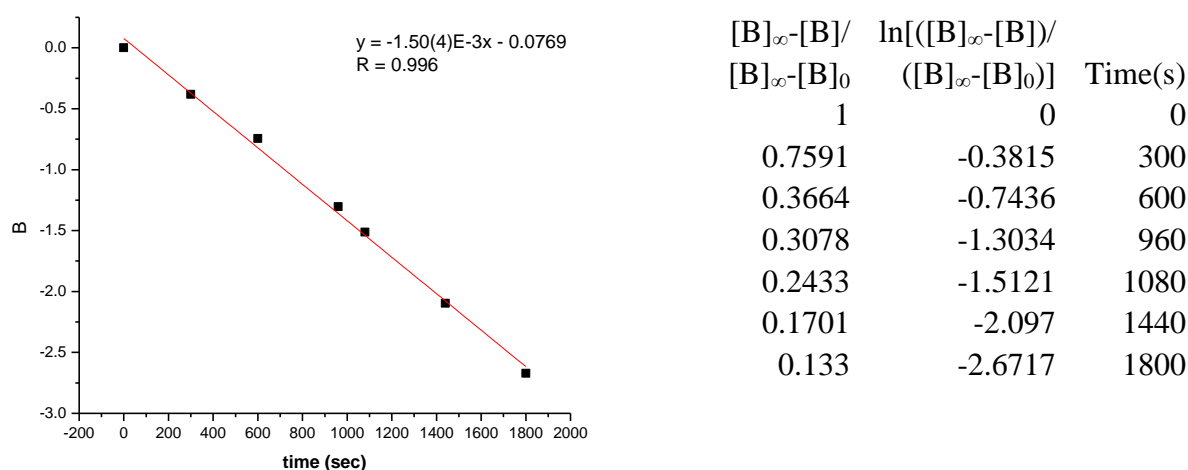

**Figure 7.32.** First-order consumption of **3g**[SbF<sub>6</sub>] at 0 °C based on the increase of **6**[SbF<sub>6</sub>]. B =  $\ln\left(\frac{[B]_{\infty}-[B]}{[B]_{\infty}-[B]_0}\right)$ .

### 7.9 Construction of the energy diagram for competitive binding of vinyl ethers and insertion of **3a-g** (Figure 1 in manuscript).

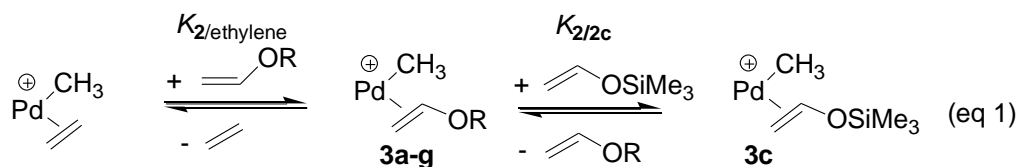

The competitive binding of ethylene and  $\text{CH}_2=\text{CHOR}$  (**2a-c**) (eq 1) was quantified by measuring  $K_{2/\text{ethylene}} = [\mathbf{3}][\text{CH}_2=\text{CH}_2][(\alpha\text{-diimine})\text{PdMe}(\text{CH}_2=\text{CH}_2)^+ ]^{-1}[\mathbf{2}]^{-1}$ . The  $K_{2a/2c}$  was determined according to equation i-iii.  $K_{2b/2c}$  was determined in an analogous manners and the results are shown in Tables 2 and 3.

$$K_{2a/\text{ethylene}} = [\mathbf{3a}][\text{CH}_2=\text{CH}_2][(\alpha\text{-diimine})\text{PdMe}(\text{CH}_2=\text{CH}_2)^+ ]^{-1}[\mathbf{2a}]^{-1} \quad (\text{i})$$

$$K_{2c/\text{ethylene}} = [\mathbf{3c}][\text{CH}_2=\text{CH}_2][(\alpha\text{-diimine})\text{PdMe}(\text{CH}_2=\text{CH}_2)^+ ]^{-1}[\mathbf{2c}]^{-1} \quad (\text{ii})$$

$$K_{2a/2c} = [\mathbf{3a}][\mathbf{2c}][\mathbf{3c}]^{-1}[\mathbf{2a}]^{-1} = K_{2a/\text{ethylene}}/K_{2c/\text{ethylene}} \quad (\text{iii})$$

$\Delta G$  for  $(\alpha\text{-diimine})\text{PdMe}(\text{CH}_2=\text{CHOR})^+$  (**3a-g**) versus **3c** was determined by equation (iv).

$$\Delta G = -RT\ln K \quad (\text{iv})$$

The free energy barrier for the insertion of **3a-g** ( $\Delta G^\ddagger$ ) was calculated by Eyring equation (v). The results are compared in Figure 1.

$$\Delta G^\ddagger = -RT\ln(k_{\text{insert},3h}/k_B T) \quad (\text{v})$$

**[{(2,6-<sup>i</sup>Pr<sub>2</sub>-C<sub>6</sub>H<sub>3</sub>)N=CAnCAn=N(2,6-<sup>i</sup>Pr<sub>2</sub>-C<sub>6</sub>H<sub>3</sub>)}PdMe(CH<sub>2</sub>=CHOSiPh<sub>3</sub>)] [SbF<sub>6</sub>] (3h) and β-OSiPh<sub>3</sub> elimination of 5h.** A NMR tube was charged with {(2,6-<sup>i</sup>Pr<sub>2</sub>-C<sub>6</sub>H<sub>3</sub>)N=C(An)-C(An)=N(2,6-<sup>i</sup>Pr<sub>2</sub>-C<sub>6</sub>H<sub>3</sub>)}PdMeCl (19.2 mg, 29.0 μmol), AgSbF<sub>6</sub> (10 mg, 29.1 μmol) and CH<sub>2</sub>=CHOSiPh<sub>3</sub> (8.8 mg, 29.1 μmol), and CD<sub>2</sub>Cl<sub>2</sub> (0.4 mL) was added by vacuum transfer at -78 °C. The tube was shaken to dissolve and thoroughly mix the components. NMR spectra at 23 °C showed that **3h**[SbF<sub>6</sub>] (90 %) had formed. Key NMR Data for **5d**: <sup>1</sup>H NMR (CD<sub>2</sub>Cl<sub>2</sub>, 23 °C) δ 8.20 (d, *J* = 8, 1H, An: H<sub>p</sub>), 8.16 (d, *J* = 8, 1H, An: H<sub>p</sub>'), 7.58-7.25 (m, 23 H, An: H<sub>m</sub>, H<sub>m</sub>', 6 H<sub>aryl</sub>, 15 H<sub>aryl</sub> from SiPh<sub>3</sub>), 6.58 (d, *J* = 8, 2H, An: H<sub>o</sub>), 3.35 (m, 2H, CHMe<sub>2</sub>), 3.16 (m, 2H, CHMe<sub>2</sub>), 1.32 (d, *J* = 7, 6H, CHMe<sub>2</sub>), 1.14 (d, *J* = 7, 6H, CHMe<sub>2</sub>), 0.98 (d, *J* = 7, 6H, CHMe<sub>2</sub>), 0.88 (d, *J* = 7, 6H, CHMe<sub>2</sub>), 0.47 (s, 6H, PdCMe<sub>2</sub>(OSiPh<sub>3</sub>)). <sup>13</sup>C NMR (CD<sub>2</sub>Cl<sub>2</sub>, -20 °C) data: δ 171.8 (N=CMe), 168.8 (N=CMe), 141.7 (CH<sub>2</sub>=CHOSiPh<sub>3</sub>), 144.9, 143.3, 142.9, 138.0, 137.3, 135.1, 135.0, 133.4, 132.9, 131.8, 131.4, 129.8, 129.5, 128.8, 128.6, 128.1, 126.3, 126.1, 125.6, 125.5, 125.3 and 124.8 (An 4 quaternary C, C<sub>o</sub>, C<sub>o</sub>', C<sub>m</sub>, C<sub>m</sub>', C<sub>p</sub>, C<sub>p</sub>'; Ar, Ar' C<sub>ipso</sub>, C<sub>ipso</sub>', C<sub>o</sub>, C<sub>o</sub>', C<sub>m</sub>, C<sub>m</sub>', C<sub>p</sub>, C<sub>p</sub>'; SiPh C<sub>ipso</sub>, C<sub>o</sub>, C<sub>m</sub>, C<sub>p</sub>), 87.9 (PdCMe<sub>2</sub>(OSiPh<sub>3</sub>)), 29.5 (CHMe<sub>2</sub>), 29.2 (CHMe<sub>2</sub>), 26.4, 24.7, 23.4, 23.2 and 23.1 (4 CHMe<sub>2</sub> and PdCMe<sub>2</sub>(OSiPh<sub>3</sub>)).

The first-order rate constant for the consumption of [(2,6-<sup>i</sup>Pr<sub>2</sub>-C<sub>6</sub>H<sub>3</sub>)N=CAnCAn=N(2,6-<sup>i</sup>Pr<sub>2</sub>-C<sub>6</sub>H<sub>3</sub>)}PdMe(CH<sub>2</sub>=CHOSiPh<sub>3</sub>)] [SbF<sub>6</sub>] measured by the disappearance of the H<sub>trans</sub> <sup>1</sup>H NMR resonance is *k*<sub>insert,3h</sub> = 1.98(2) × 10<sup>-4</sup> s<sup>-1</sup> at 0 °C. After [(2,6-<sup>i</sup>Pr<sub>2</sub>-C<sub>6</sub>H<sub>3</sub>)N=CAnCAn=N(2,6-<sup>i</sup>Pr<sub>2</sub>-C<sub>6</sub>H<sub>3</sub>)}PdMe(CH<sub>2</sub>=CHOSiPh<sub>3</sub>)] [SbF<sub>6</sub>] is fully consumed, the tube was warmed to 20 °C and monitored by <sup>1</sup>H NMR periodically. Complex

$[\{(2,6\text{-}^i\text{Pr}_2\text{-C}_6\text{H}_3)\text{N}=\text{CAnCAn}=\text{N}(2,6\text{-}^i\text{Pr}_2\text{-C}_6\text{H}_3)\}\text{PdCMe}_2(\text{OSiPh}_3)][\text{SbF}_6]$  was converted to **6** $[\text{SbF}_6]$ . The first-order rate constant for consumption of  $[\{(2,6\text{-}^i\text{Pr}_2\text{-C}_6\text{H}_3)\text{N}=\text{CAnCAn}=\text{N}(2,6\text{-}^i\text{Pr}_2\text{-C}_6\text{H}_3)\}\text{PdCMe}_2(\text{OSiPh}_3)][\text{SbF}_6]$  (**5h**) measured by the disappearance of the  $\text{PdCMe}_2$  resonance is  $k_{\beta\text{-OSiPh}_3, \text{obs}} = 1.37(1) \times 10^{-4} \text{ s}^{-1}$  at 20 °C.

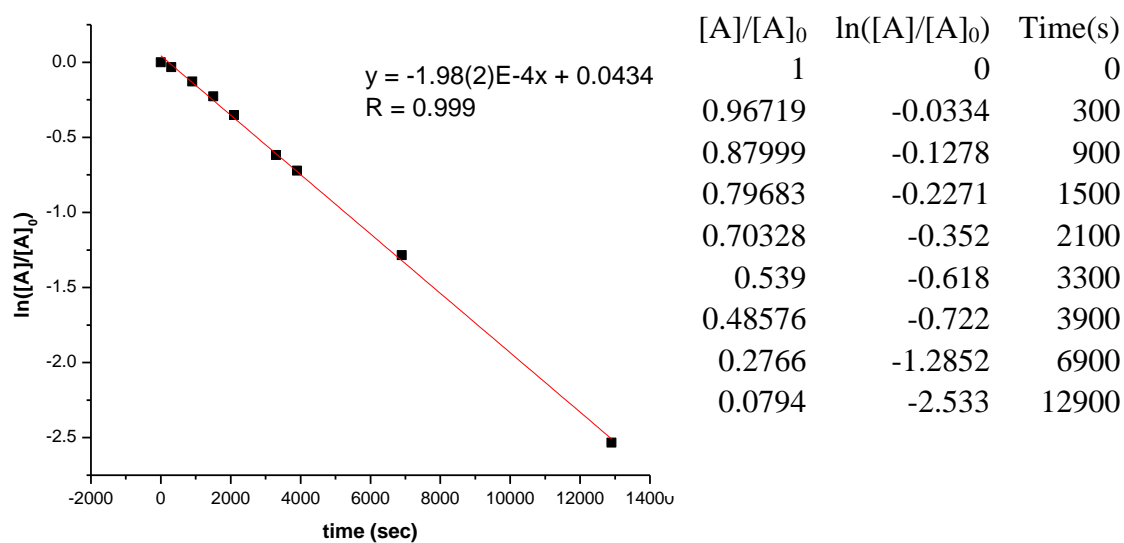

**Figure 7.33.** First-order consumption of **3h** at 0 °C.

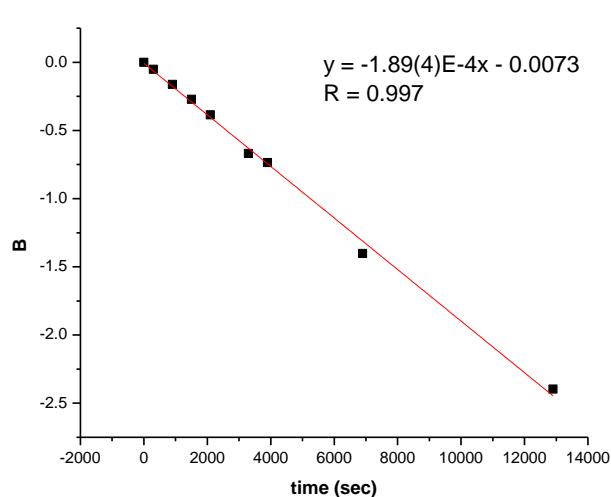

| $\frac{[B]_{\infty}-[B]}{[B]_{\infty}-[B]_0}$ | $\ln\left(\frac{[B]_{\infty}-[B]}{[B]_{\infty}-[B]_0}\right)$ | Time(s) |
|-----------------------------------------------|---------------------------------------------------------------|---------|
| 1                                             | 0                                                             | 0       |
| 0.9501                                        | -0.05119                                                      | 300     |
| 0.85                                          | -0.16252                                                      | 900     |
| 0.7613                                        | -0.27273                                                      | 1500    |
| 0.6793                                        | -0.38669                                                      | 2100    |
| 0.512                                         | -0.66943                                                      | 3300    |
| 0.4791                                        | -0.73585                                                      | 3900    |
| 0.2459                                        | -1.40283                                                      | 6900    |
| 0.091                                         | -2.3969                                                       | 12900   |

**Figure 7.34.** First-order consumption of **3h** at 0 °C based on increase of insertion product.  $B = \ln\left(\frac{[B]_{\infty}-[B]}{[B]_{\infty}-[B]_0}\right)$ .

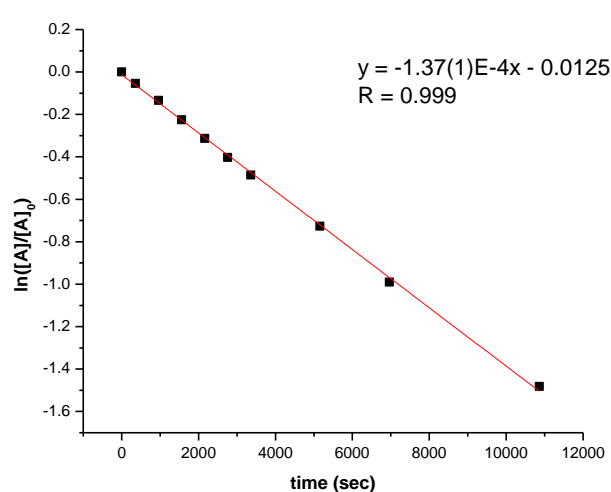

| $\frac{[A]}{[A]_0}$ | $\ln\left(\frac{[A]}{[A]_0}\right)$ | Time(s) |
|---------------------|-------------------------------------|---------|
| 1                   | 0                                   | 0       |
| 0.946778            | -0.05469                            | 360     |
| 0.86224             | -0.14822                            | 960     |
| 0.78397             | -0.24338                            | 1560    |
| 0.7057              | -0.34857                            | 2160    |
| 0.64308             | -0.44149                            | 2760    |
| 0.58986             | -0.52787                            | 3360    |
| 0.48341             | -0.72689                            | 5160    |
| 0.3713              | -0.99074                            | 6960    |
| 0.2273              | -1.48148                            | 10860   |

**Figure 7.35.** First-order consumption of  $[(2,6\text{-}^i\text{Pr}_2\text{-C}_6\text{H}_3)\text{N}=\text{CAnCAn}=\text{N}(2,6\text{-}^i\text{Pr}_2\text{-C}_6\text{H}_3)]\text{PdCMe}_2(\text{OSiPh}_3)[\text{SbF}_6][\text{SbF}_6]$  at 20 °C.

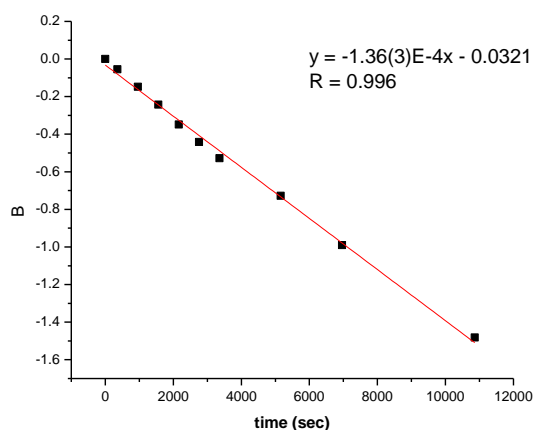

| $\frac{[B]_{\infty}-[B]}{[B]_{\infty}-[B]_0}$ | $\ln\left(\frac{[B]_{\infty}-[B]}{[B]_{\infty}-[B]_0}\right)$ | Time(s) |
|-----------------------------------------------|---------------------------------------------------------------|---------|
| 1                                             | 0                                                             | 0       |
| 0.9471                                        | -0.05435                                                      | 360     |
| 0.875                                         | -0.13353                                                      | 960     |
| 0.7981                                        | -0.22552                                                      | 1560    |
| 0.7308                                        | -0.31362                                                      | 2160    |
| 0.6683                                        | -0.40302                                                      | 2760    |
| 0.6154                                        | -0.48548                                                      | 3360    |
| 0.5096                                        | -0.67413                                                      | 5160    |
| 0.4086                                        | -0.89502                                                      | 6960    |
| 0.2933                                        | -1.22656                                                      | 10860   |

**Figure 7.36.** First-order consumption of  $[\{(2,6\text{-}^i\text{Pr}_2\text{-C}_6\text{H}_3)\text{N}=\text{CAnCAn}=\text{N}(2,6\text{-}^i\text{Pr}_2\text{-C}_6\text{H}_3)\}\text{PdCMe}_2(\text{OSiPh}_3)][\text{SbF}_6][\text{SbF}_6]$  at  $20\text{ }^{\circ}\text{C}$  based on increase of the allyl product.  $B = \ln\left(\frac{[B]_{\infty}-[B]}{[B]_{\infty}-[B]_0}\right)$ .

### 7.11 Insertion of

$[\{(4\text{-Me-C}_6\text{H}_5)\text{N}=\text{CMeCMe}=\text{N}(4\text{-Me-C}_6\text{H}_5)\}\text{PdMe}(\text{CH}_2=\text{CHOSiPh}_3)][\text{SbF}_6]$  (**3i**). The

first-order rate constant for the consumption of **3i** measured by the disappearance of the  $\text{H}_{\text{trans}}$

$^1\text{H}$  NMR resonance is  $k_{\text{insert, 3i}} = 1.76(4) \times 10^{-4} \text{ s}^{-1}$  at  $0\text{ }^{\circ}\text{C}$ .

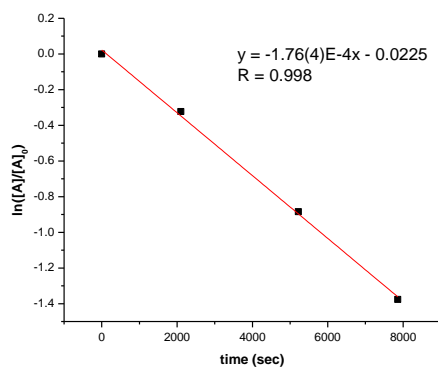

| $[A]/[A]_0$ | $\ln([A]/[A]_0)$ | Time(s) |
|-------------|------------------|---------|
| 1           | 0                | 0       |
| 0.724343    | -0.32249         | 2100    |
| 0.413114    | -0.88403         | 5220    |
| 0.252423    | -1.37665         | 7860    |

**Figure 7.37.** First-order consumption of **3i** at  $0\text{ }^{\circ}\text{C}$ .



## 8. X-Ray Crystallography.

**8.1  $[(\alpha\text{-diimine})\text{Pd}(\eta^3\text{-C}_3\text{H}_5)][\text{B}(\text{C}_6\text{F}_5)_4](6[\text{B}(\text{C}_6\text{F}_5)_4])$ .** Single crystals of  $6[\text{B}(\text{C}_6\text{F}_5)_4]$  were obtained by slow diffusion of hexanes into the concentrated  $\text{CH}_2\text{Cl}_2$  solution at room temperature. The molecular structure of  $6[\text{B}(\text{C}_6\text{F}_5)_4]$  was determined by X-ray diffraction and is shown in Figure 8.1 and the crystallographic data are summarized in Table 8.1. Data were collected on a Bruker Smart Apex diffractometer using Mo  $K\alpha$  radiation (0.71073 Å). Direct methods were used to locate The Pd atom as well as many C atoms from the E-map. Repeated difference Fourier maps allowed recognition of all expected non-H atoms. Following anisotropic refinement of all non-hydrogen atoms, ideal H atom positions were calculated. Final refinement was anisotropic for Pd, N, B F and C and isotropic-riding for H atoms. Positional disorder was apparent for C29, C30 and C31. C30 was spit into two atoms, C30A and C30B each with occupancies of 0.5. C30A and C30B were refined as isotropic atoms while the displacement parameters for C29 and C31 showed elongation due to the positional disorder. No other anomalous bond lengths or thermal parameters were noted. All ORTEP diagrams have been drawn with 50% probability ellipsoids.

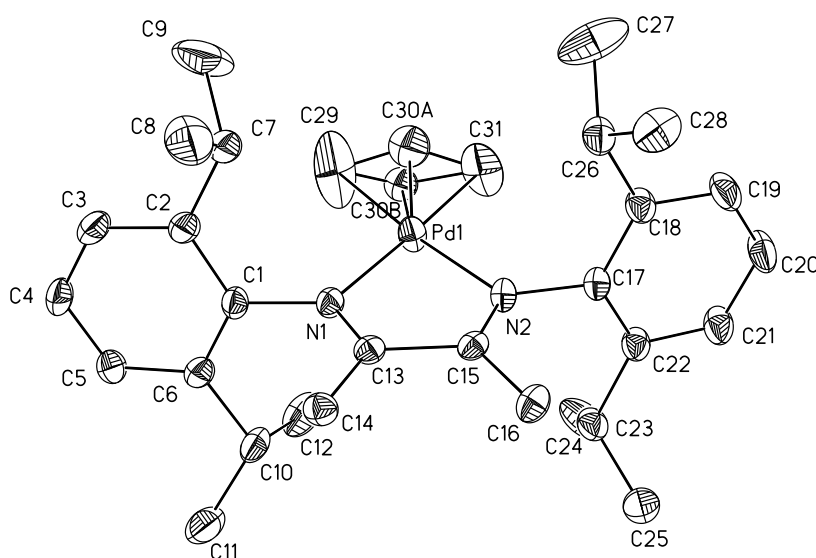

**Figure 8.1.** Molecular structure of **6[B(C<sub>6</sub>F<sub>5</sub>)<sub>4</sub>]**. Hydrogen atoms and the anion are omitted for clarity.

**Table 8.1.** Summary of X-Ray Diffraction Data for **6[B(C<sub>6</sub>F<sub>5</sub>)<sub>4</sub>]**.

|                                                                                                                                                                                                                                                                                                                                                                                                             |                                                                                      |
|-------------------------------------------------------------------------------------------------------------------------------------------------------------------------------------------------------------------------------------------------------------------------------------------------------------------------------------------------------------------------------------------------------------|--------------------------------------------------------------------------------------|
| formula                                                                                                                                                                                                                                                                                                                                                                                                     | C <sub>31</sub> H <sub>45</sub> N <sub>2</sub> Pd + C <sub>24</sub> BF <sub>20</sub> |
| formula weight                                                                                                                                                                                                                                                                                                                                                                                              | 1226.10 (including solvent)                                                          |
| crystal system                                                                                                                                                                                                                                                                                                                                                                                              | Monoclinic                                                                           |
| space group                                                                                                                                                                                                                                                                                                                                                                                                 | P2 <sub>1</sub> /c                                                                   |
| <i>a</i> (Å)                                                                                                                                                                                                                                                                                                                                                                                                | 15.922(3)                                                                            |
| <i>b</i> (Å)                                                                                                                                                                                                                                                                                                                                                                                                | 20.076(4)                                                                            |
| <i>c</i> (Å)                                                                                                                                                                                                                                                                                                                                                                                                | 19.176(3)                                                                            |
| $\beta$ (°)                                                                                                                                                                                                                                                                                                                                                                                                 | 121.573(10)                                                                          |
| <i>V</i> (Å <sup>3</sup> )                                                                                                                                                                                                                                                                                                                                                                                  | 5222.3(16)                                                                           |
| <i>Z</i>                                                                                                                                                                                                                                                                                                                                                                                                    | 4                                                                                    |
| <i>T</i> (K)                                                                                                                                                                                                                                                                                                                                                                                                | 100                                                                                  |
| crystal color, habit                                                                                                                                                                                                                                                                                                                                                                                        | yellow, fragment                                                                     |
| GOF on <i>F</i> <sup>2</sup>                                                                                                                                                                                                                                                                                                                                                                                | 1.018                                                                                |
| R indices [ <i>I</i> > 2σ( <i>I</i> )] <sup>a</sup>                                                                                                                                                                                                                                                                                                                                                         | R1 = 0.0435, wR2 = 0.0972                                                            |
| R indices (all data) <sup>a</sup>                                                                                                                                                                                                                                                                                                                                                                           | R1 = 0.0664, wR2 = 0.1042                                                            |
| <sup>a</sup> R1 = Σ   <i>F</i> <sub>o</sub>   -   <i>F</i> <sub>c</sub>   /Σ  <i>F</i> <sub>o</sub>  ; wR2 = [Σ[w( <i>F</i> <sub>o</sub> <sup>2</sup> - <i>F</i> <sub>c</sub> <sup>2</sup> ) <sup>2</sup> ]/ Σ[w( <i>F</i> <sub>o</sub> <sup>2</sup> )]] <sup>1/2</sup> , where <i>w</i> = q[σ <sup>2</sup> ( <i>F</i> <sub>o</sub> <sup>2</sup> ) + ( <i>aP</i> ) <sup>2</sup> + <i>bP</i> ] <sup>-1</sup> |                                                                                      |

## 9. DFT Calculations.

**9.1 DFT studies of the structure of 4a and 5a.** DFT studies at the B3LYP level using the 6-31G\* (for C, H, N, O) and Lanl2DZ (for Pd) basis sets provide additional evidence for the O-chelated structures in **4a** and **5a**.<sup>10</sup> The optimized structures of **4a** and **5a** are shown in Figure 9.1. The calculated Pd-O distances are 2.19 Å (**4a**) and 2.15 Å (**5a**), which are typical for Pd(II)-OR<sub>2</sub> distances.<sup>11</sup> DFT studies show that the energy difference between **4a** and **5a** is

small ( $E_{4a} - E_{5a} = 0.2 \pm 1.0$  kcal/mol), which is consistent with the fact that both isomers are observed.

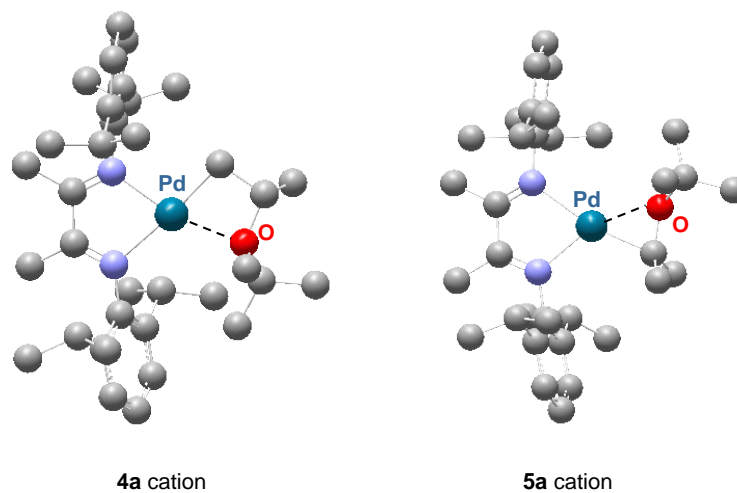

**Figure 9.1.** Optimized structures of the **4a** and **5a** cations. Hydrogens are omitted.

## 9.2 DFT studies of the structure of **4c** and **5c**.

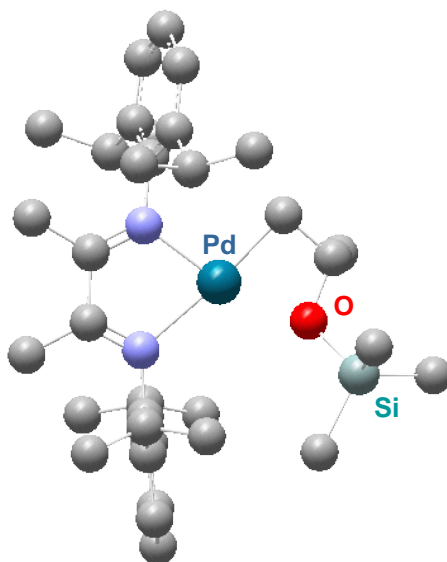

**Figure 9.2.** Optimized structure of the  $(\alpha\text{-diimine})\text{Pd}\{\text{CH}_2\text{CH}(\text{OSiMe}_3)\text{CH}_3\}^+$  (**4c**) cation.

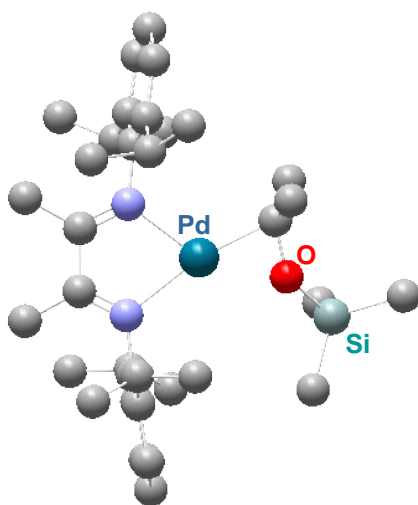

**Figure 9.3.** Optimized structure of the  $(\alpha\text{-diimine})\text{Pd}\{\text{CMe}_2(\text{OSiMe}_3)\}^+$  (**5c**) cation.

## 10. NMR Spectra for Cationic Polymers and Kinetics Studies.

### 10. 1 Spectra of $-\text{[CH}_2\text{CH}(\text{O}^t\text{Bu})\text{]}_n-$ homopolymer.

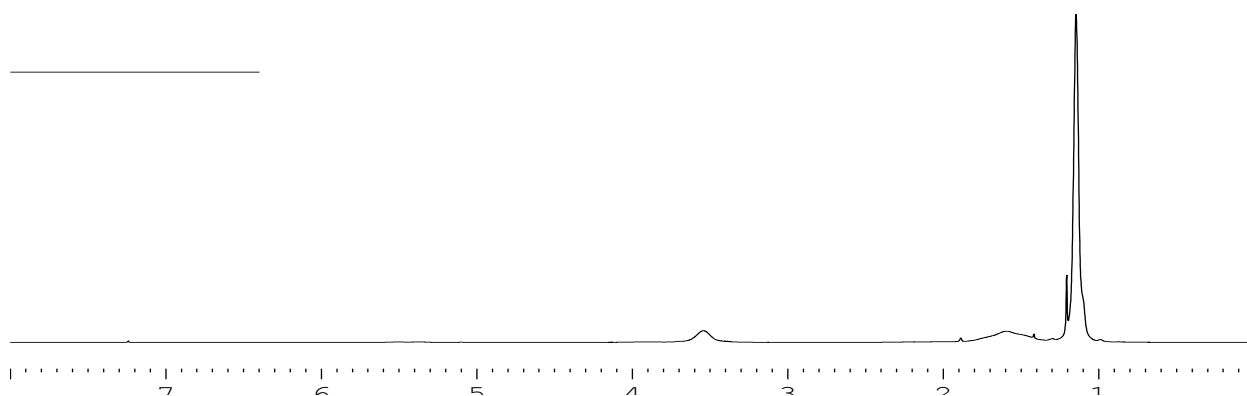

**Figure 10-1a.**  $^1\text{H}$  NMR of  $-\text{[CH}_2\text{CH}(\text{O}^t\text{Bu})\text{]}_n-$  homopolymer ( $\text{CDCl}_3$ ): full spectrum.

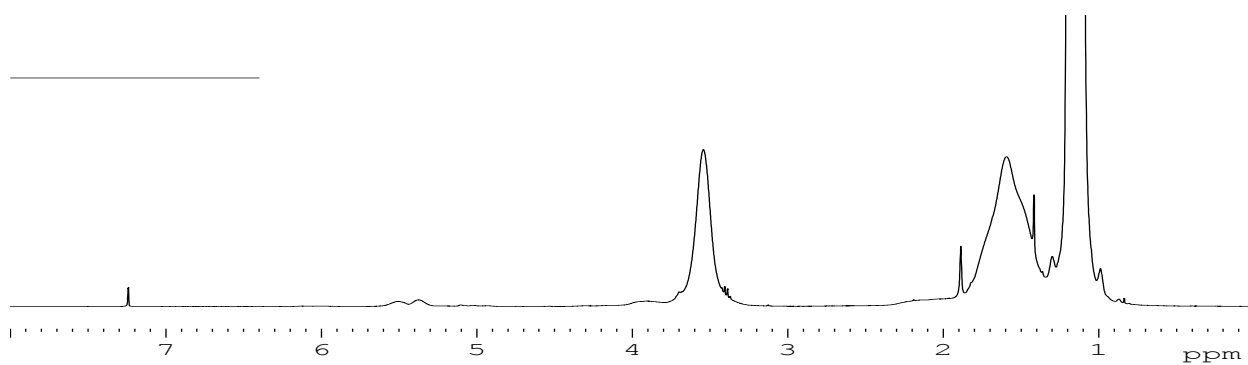

**Figure 10-1b.**  $^1\text{H}$  NMR of  $-\text{[CH}_2\text{CH}(\text{O}^t\text{Bu})]_n-$  homopolymer ( $\text{CDCl}_3$ ): vertical expansion.

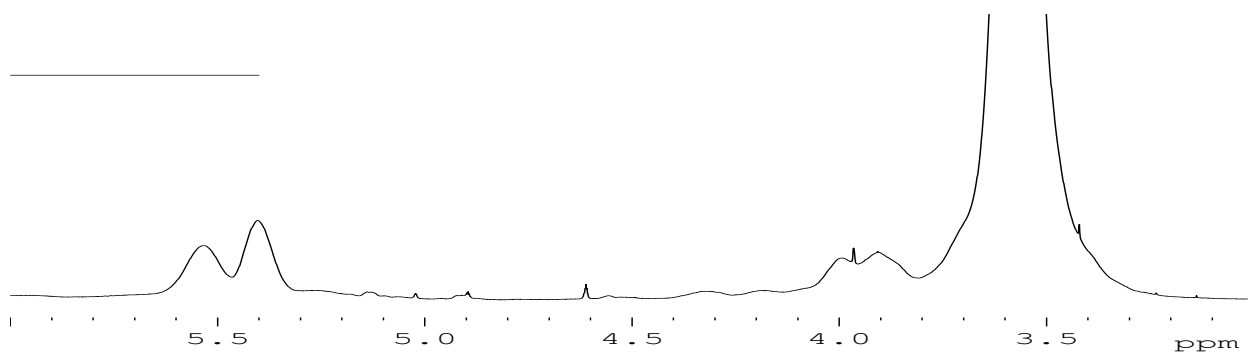

**Figure 10-1c.**  $^1\text{H}$  NMR of  $-\text{[CH}_2\text{CH}(\text{O}^t\text{Bu})]_n-$  homopolymer ( $\text{CDCl}_3$ ): expansion of the  $\delta$  6.0-3.0 region.

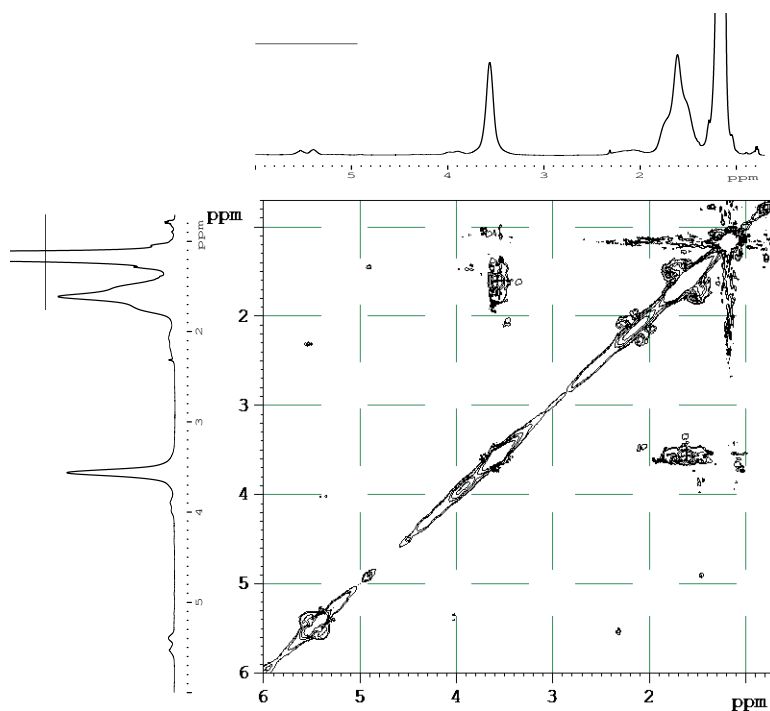

**Figure 10-1d.** COSY NMR of  $-\text{[CH}_2\text{CH(O}^t\text{Bu)]}_n-$  homopolymer ( $\text{CDCl}_3$ ): expansion of the  $\delta$  6.0-0.7; 6.0-0.7 region.

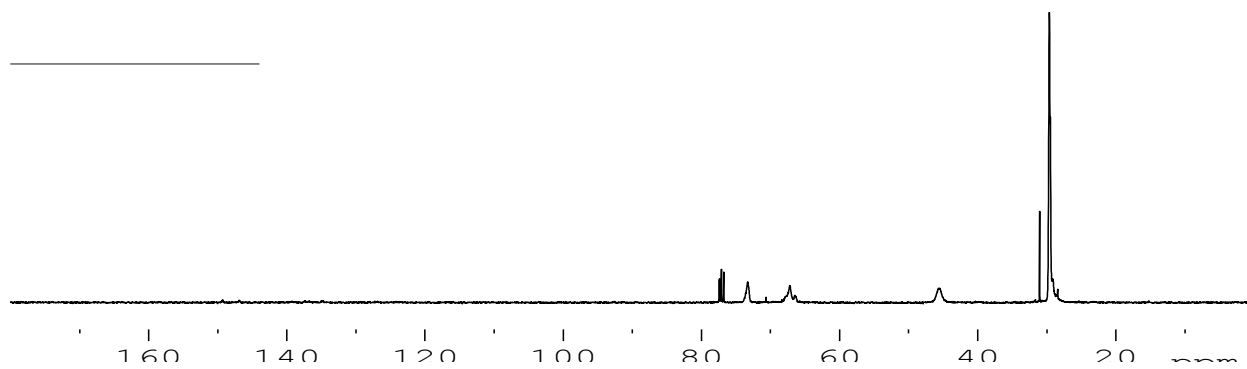

**Figure 10-1e.**  $^{13}\text{C}$  NMR of  $-\text{[CH}_2\text{CH(O}^t\text{Bu)]}_n-$  homopolymer ( $\text{CDCl}_3$ ): full spectrum.

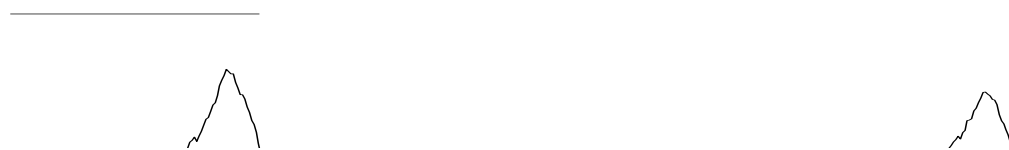

**Figure 10-1f.**  $^{13}\text{C}$  NMR of  $-\text{[CH}_2\text{CH(O}^t\text{Bu)}]_n-$  homopolymer ( $\text{CDCl}_3$ ): expansion of the  $\delta$  75-65 region. The sharp signal at  $\delta$  70.6 is from  $\text{HO}^t\text{Bu}$ .

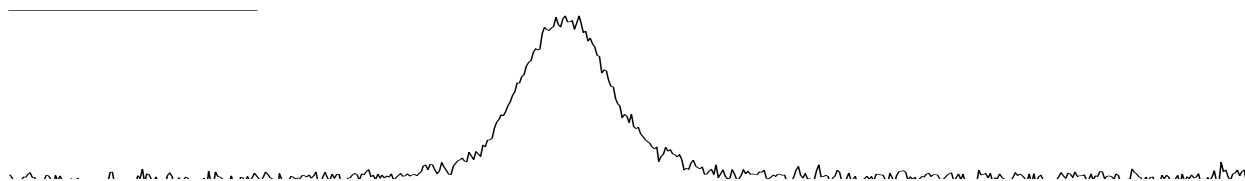

**Figure 10-1g.**  $^{13}\text{C}$  NMR of  $-\text{[CH}_2\text{CH(O}^t\text{Bu)}]_n-$  homopolymer ( $\text{CDCl}_3$ ): expansion of the  $\delta$  50-40 region. The sharp signal at  $\delta$  31.0 is from  $\text{HO}^t\text{Bu}$ .

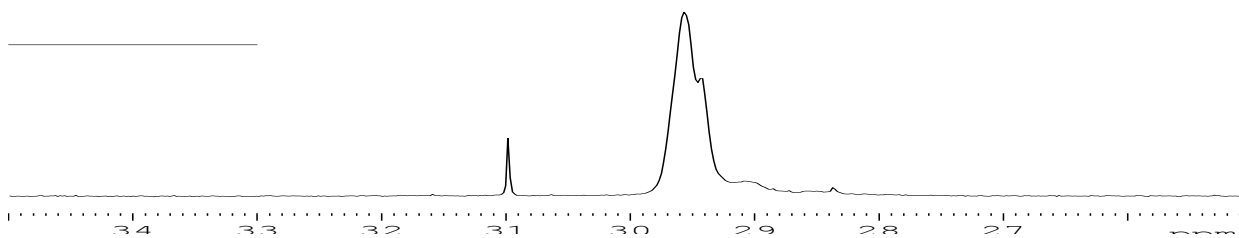

**Figure 10-1h.**  $^{13}\text{C}$  NMR of  $-\text{[CH}_2\text{CH(O}^t\text{Bu)}]_n-$  homopolymer ( $\text{CDCl}_3$ ): expansion of the  $\delta$  35-25 region.

## 10.2 Spectra of $-\text{[CH}_2\text{CH(OSiMe}_3)]_n-$ homopolymer and attempted polymerization of $\text{CH}_2=\text{CHOSiPh}_3$ and $\text{CH}_2=\text{CHOPh}$ .

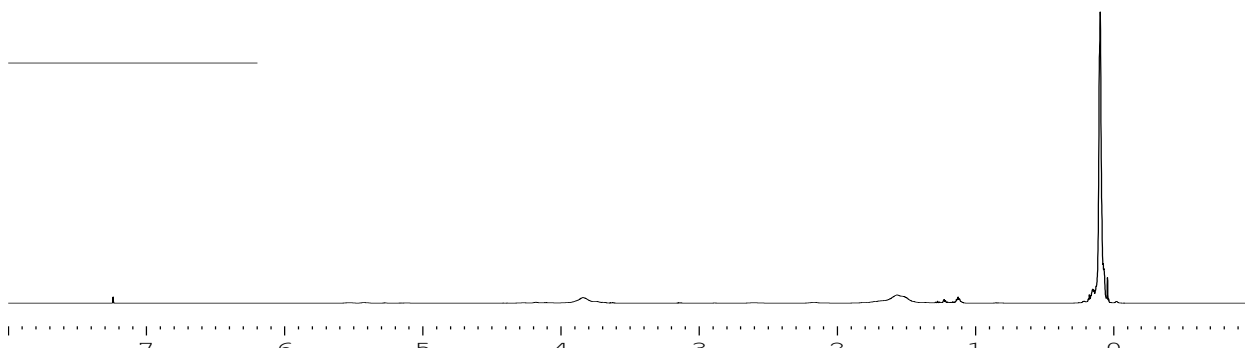

**Figure 10-2a.**  $^1\text{H}$  NMR of  $-\text{[CH}_2\text{CH(OSiMe}_3)]_n-$  homopolymer ( $\text{CDCl}_3$ ): full spectrum.

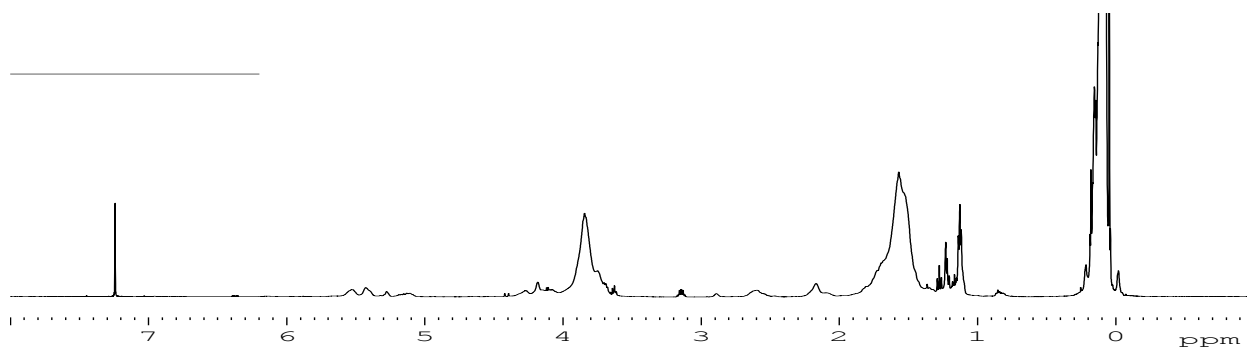

**Figure 10-2b.**  $^1\text{H}$  NMR of  $-\text{[CH}_2\text{CH(OSiMe}_3\text{)]}_n-$  homopolymer ( $\text{CDCl}_3$ ): vertical expansion.

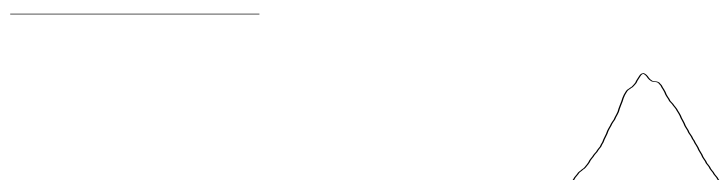

**Figure 10-2c.**  $^1\text{H}$  NMR of  $-\text{[CH}_2\text{CH(OSiMe}_3\text{)]}_n-$  homopolymer ( $\text{CDCl}_3$ ): expansion of the  $\delta$  4.3-3.4 region.

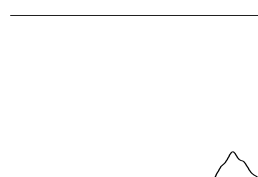

**Figure 10-2d.**  $^1\text{H}$  NMR of  $-\text{[CH}_2\text{CH(OSiMe}_3\text{)]}_n-$  homopolymer ( $\text{CDCl}_3$ ): expansion of the  $\delta$  1.8-0.5 region.



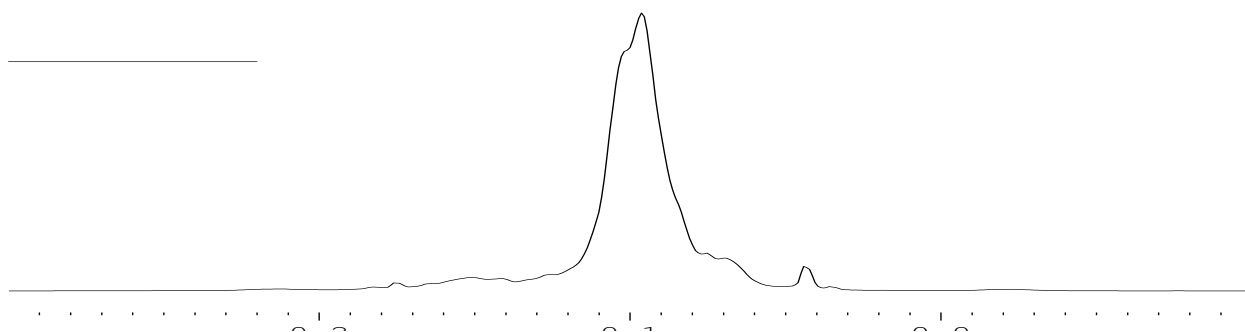

**Figure 10-2e.**  $^1\text{H}$  NMR of  $-\text{[CH}_2\text{CH(OSiMe}_3\text{)]}_n-$  homopolymer ( $\text{CDCl}_3$ ): expansion of the  $\delta$  0.3 - -0.1 region.

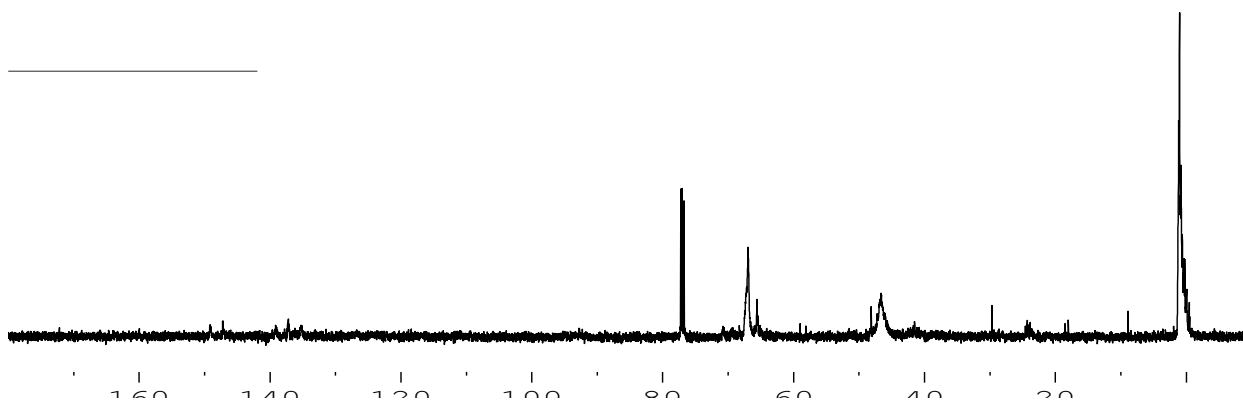

**Figure 10-2f.**  $^{13}\text{C}$  NMR of  $-\text{[CH}_2\text{CH(OSiMe}_3\text{)]}_n-$  homopolymer ( $\text{CDCl}_3$ ): full spectrum.

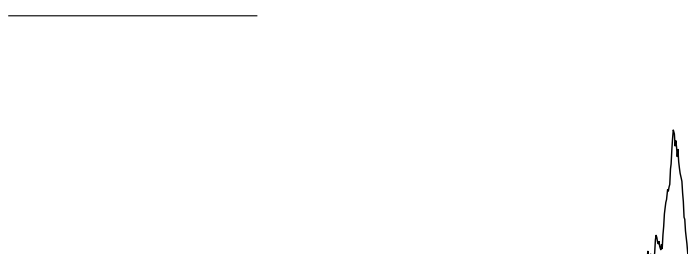

**Figure 10-2g.**  $^{13}\text{C}$  NMR of  $-\text{[CH}_2\text{CH(OSiMe}_3\text{)]}_n-$  ( $\text{CDCl}_3$ ): expansion of the  $\delta$  75-60 region.

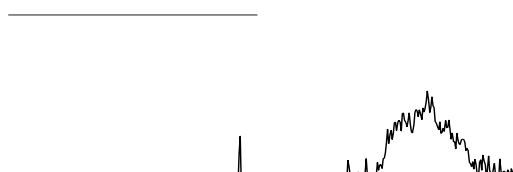

**Figure 10-2h.** <sup>13</sup>C NMR of  $-\text{[CH}_2\text{CH(OSiMe}_3\text{)]}_n-$  homopolymer ( $\text{CDCl}_3$ ): expansion of the  $\delta$  50-40 region.

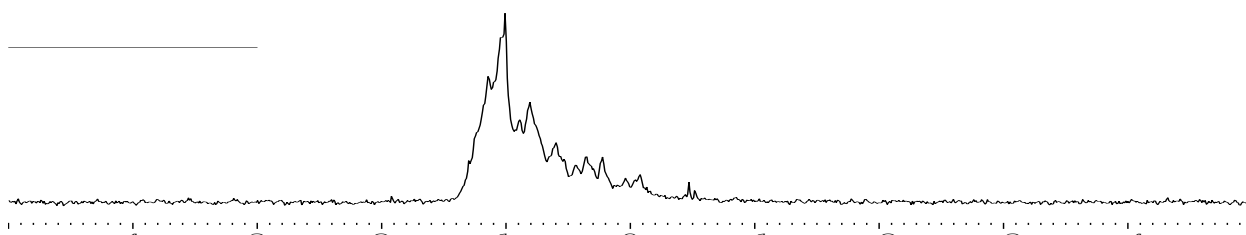

**Figure 10-2i.** <sup>13</sup>C NMR of  $-\text{[CH}_2\text{CH(OSiMe}_3\text{)]}_n-$  homopolymer ( $\text{CDCl}_3$ ): expansion of the  $\delta$  5 - -5 region.

### 10.3 Selected $^1\text{H}$ NMR spectra for $\text{CH}_2=\text{CHO}^t\text{Bu}$ case:

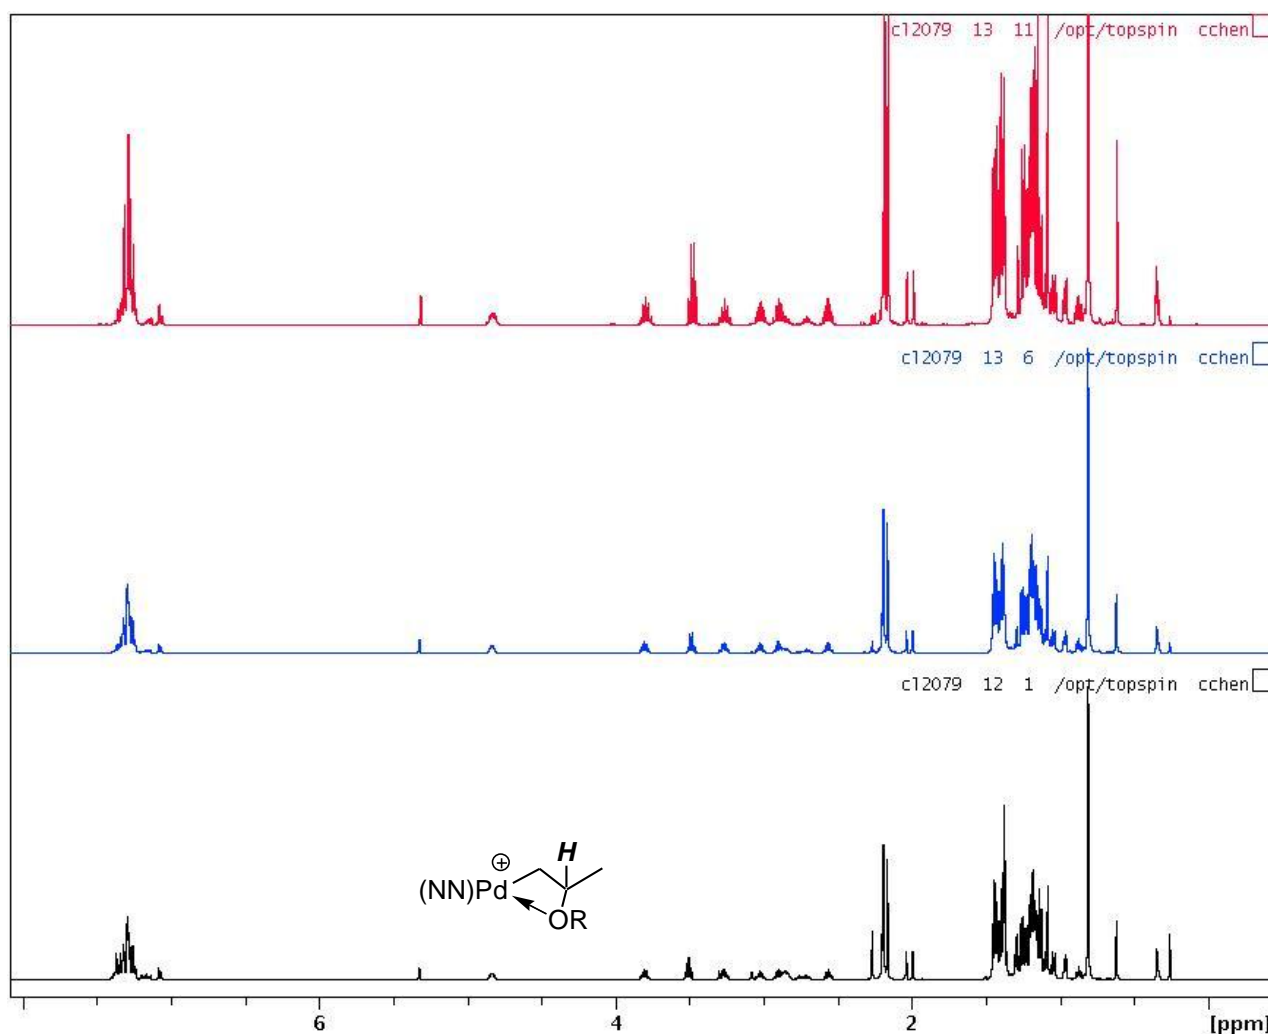

**Figure 10-3a.** Selected spectra for the insertion of  $[(\alpha\text{-diimine})\text{PdMe}(\text{CH}_2=\text{CHO}^t\text{Bu})][\text{B}(\text{C}_6\text{F}_5)_4]$  (**3a**) to produce  $[(\alpha\text{-diimine})\text{Pd}\{\text{CH}_2\text{CHMe}(\text{O}^t\text{Bu})\}][\text{B}(\text{C}_6\text{F}_5)_4]$  (**4b**) and  $[(\alpha\text{-diimine})\text{Pd}\{\text{CMe}_2(\text{O}^t\text{Bu})\}][\text{B}(\text{C}_6\text{F}_5)_4]$  (**5b**) at  $0\text{ }^\circ\text{C}$ : full spectra. The bottom spectrum is the starting point of the reaction, the middle spectrum corresponds to ca. 50% completion and the top spectrum corresponds to ca. 90% completion. For kinetics analysis see Figure 5.1 and Figure 5.2.

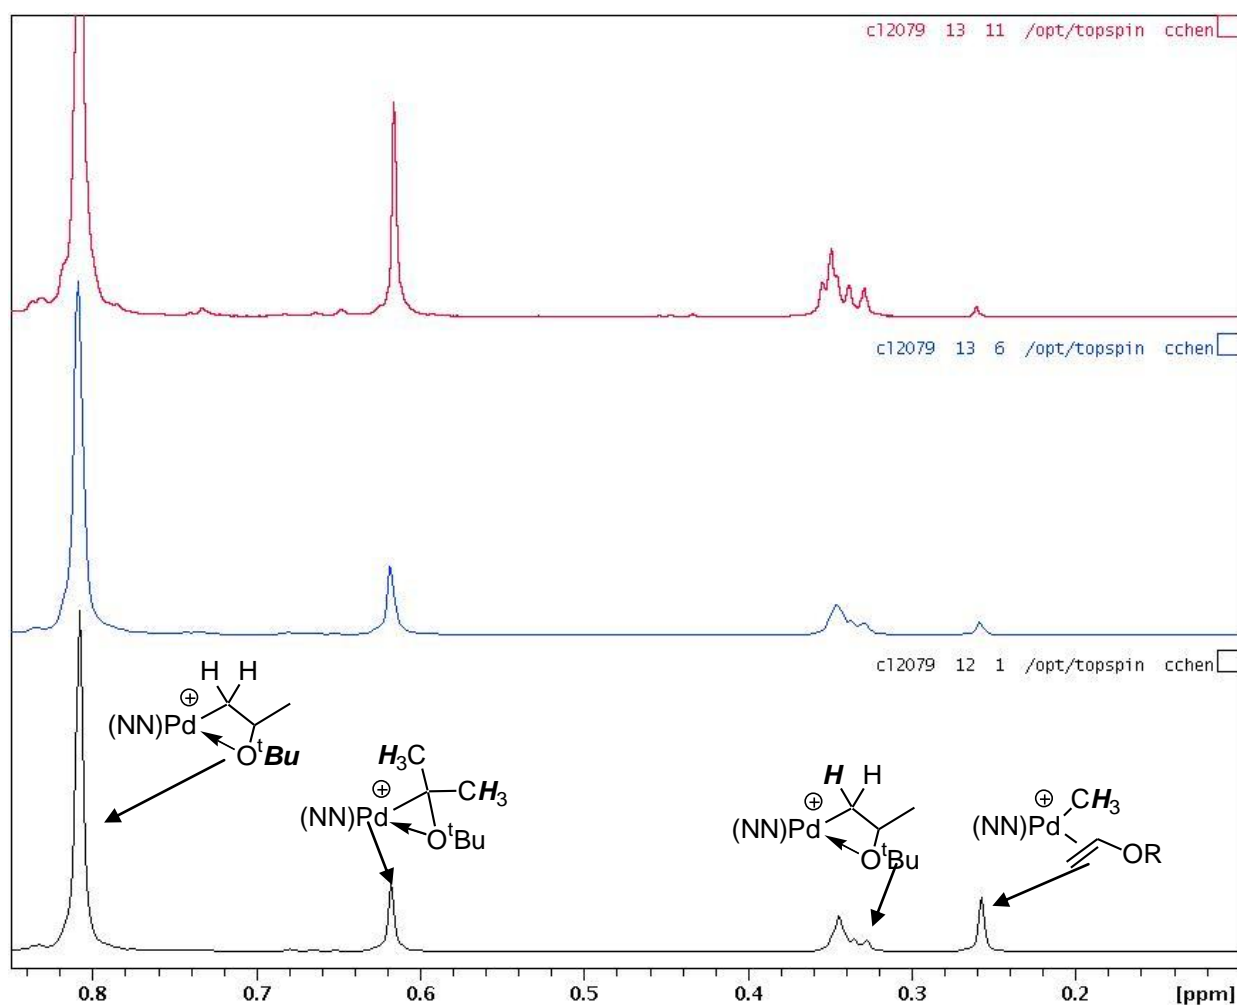

**Figure 10-3b.** Selected spectra for the first-order consumption of  $[(\alpha\text{-diimine})\text{PdMe}(\text{CH}_2=\text{CHO}^t\text{Bu})][\text{B}(\text{C}_6\text{F}_5)_4]$  (**3a**) at  $0^\circ\text{C}$ : expansion of  $\delta$  0.8-0.1. The peak at 0.35 is  $[(\alpha\text{-diimine})\text{PdMe}]_2(\mu\text{-Cl})[\text{B}(\text{C}_6\text{F}_5)_4]$ . The bottom spectrum is the starting point of the reaction, the middle spectrum corresponds to ca. 50% completion and the top spectrum corresponds to ca. 90% completion. For kinetics analysis see Figure 5.1 and Figure 5.2.

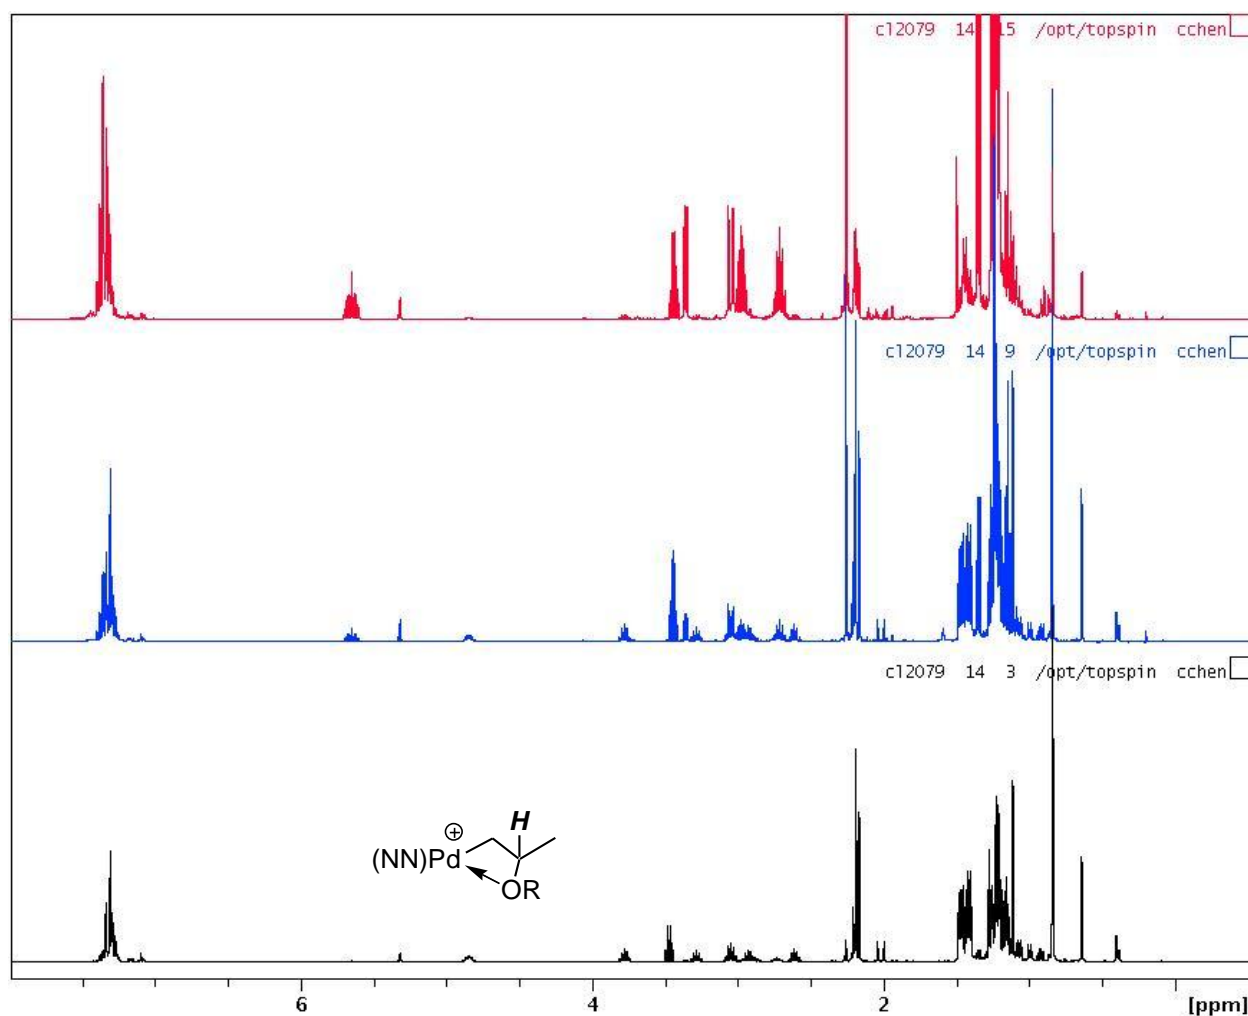

**Figure 10-3c.** Selected spectra for the first-order consumption of  $[(\alpha\text{-diimine})\text{Pd}\{\text{CH}_2\text{CHMe}(\text{O}^t\text{Bu})\}][\text{B}(\text{C}_6\text{F}_5)_4]$  (**4b**) and  $[(\alpha\text{-diimine})\text{Pd}\{\text{CMe}_2(\text{O}^t\text{Bu})\}][\text{B}(\text{C}_6\text{F}_5)_4]$  (**5b**) at 20 °C: full spectra. The bottom spectrum is the starting point of the reaction, the middle spectrum corresponds to ca. 50% completion and the top spectrum corresponds to ca. 90% completion. For kinetics analysis see Figure 5.5 and Figure 5.6.

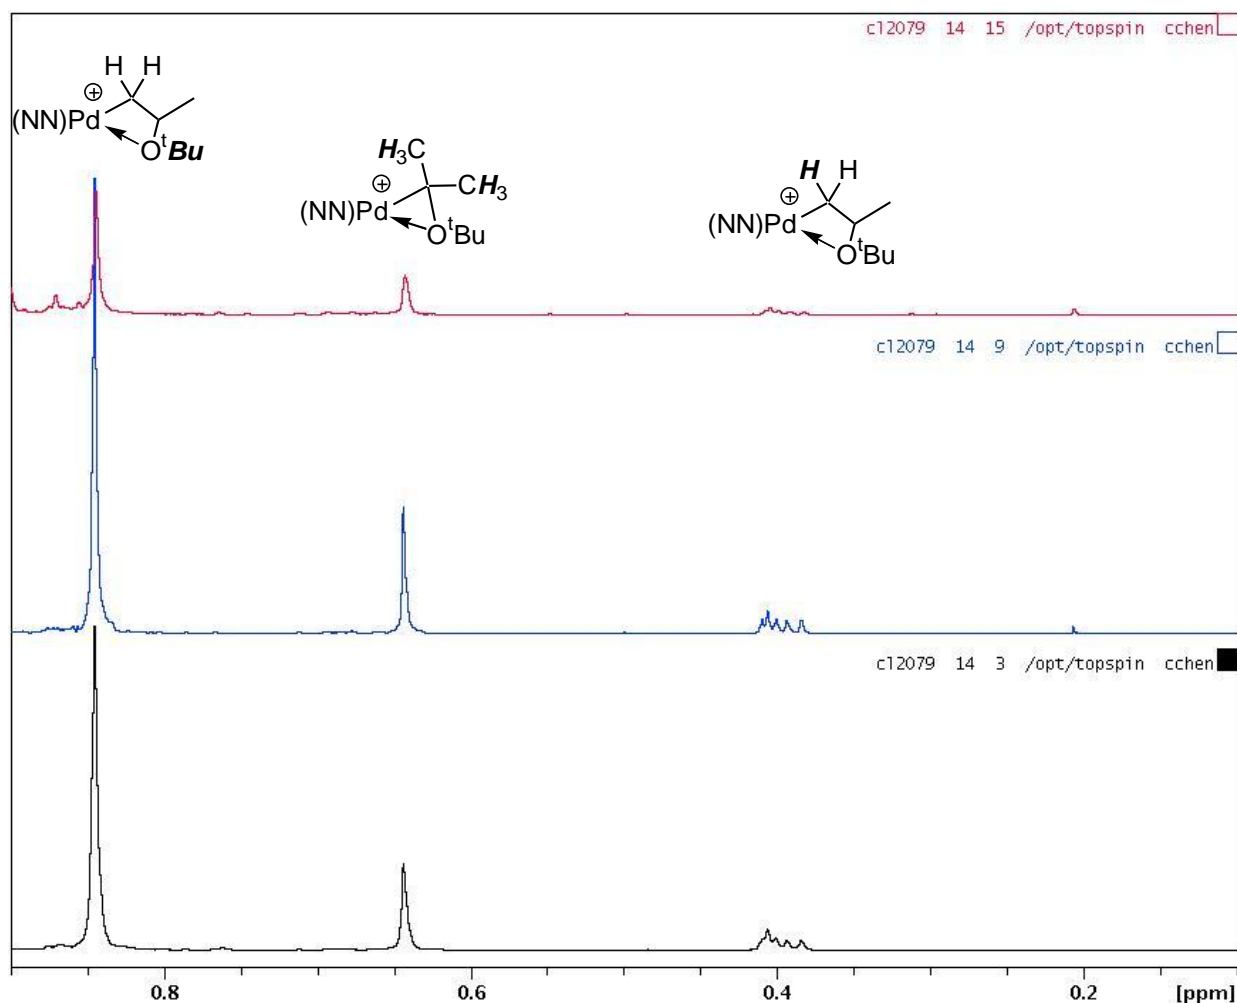

**Figure 10-3d.** Selected spectra for the first-order consumption of  $[(\alpha\text{-diimine})\text{Pd}\{\text{CH}_2\text{CHMe}(\text{O}^t\text{Bu})\}][\text{B}(\text{C}_6\text{F}_5)_4]$  (**4b**) and  $[(\alpha\text{-diimine})\text{Pd}\{\text{CMe}_2(\text{O}^t\text{Bu})\}][\text{B}(\text{C}_6\text{F}_5)_4]$  (**5b**) at 20 °C: expansion of  $\delta$  0.8-0.1. The peak at ca. 0.4 is  $[(\alpha\text{-diimine})\text{PdMe}_2(\mu\text{-Cl})][\text{B}(\text{C}_6\text{F}_5)_4]$ . The bottom spectrum is the starting point of the reaction, the middle spectrum corresponds to ca. 50% completion and the top spectrum corresponds to ca. 90% completion. For kinetics analysis see Figure 5.5 and Figure 5.6.

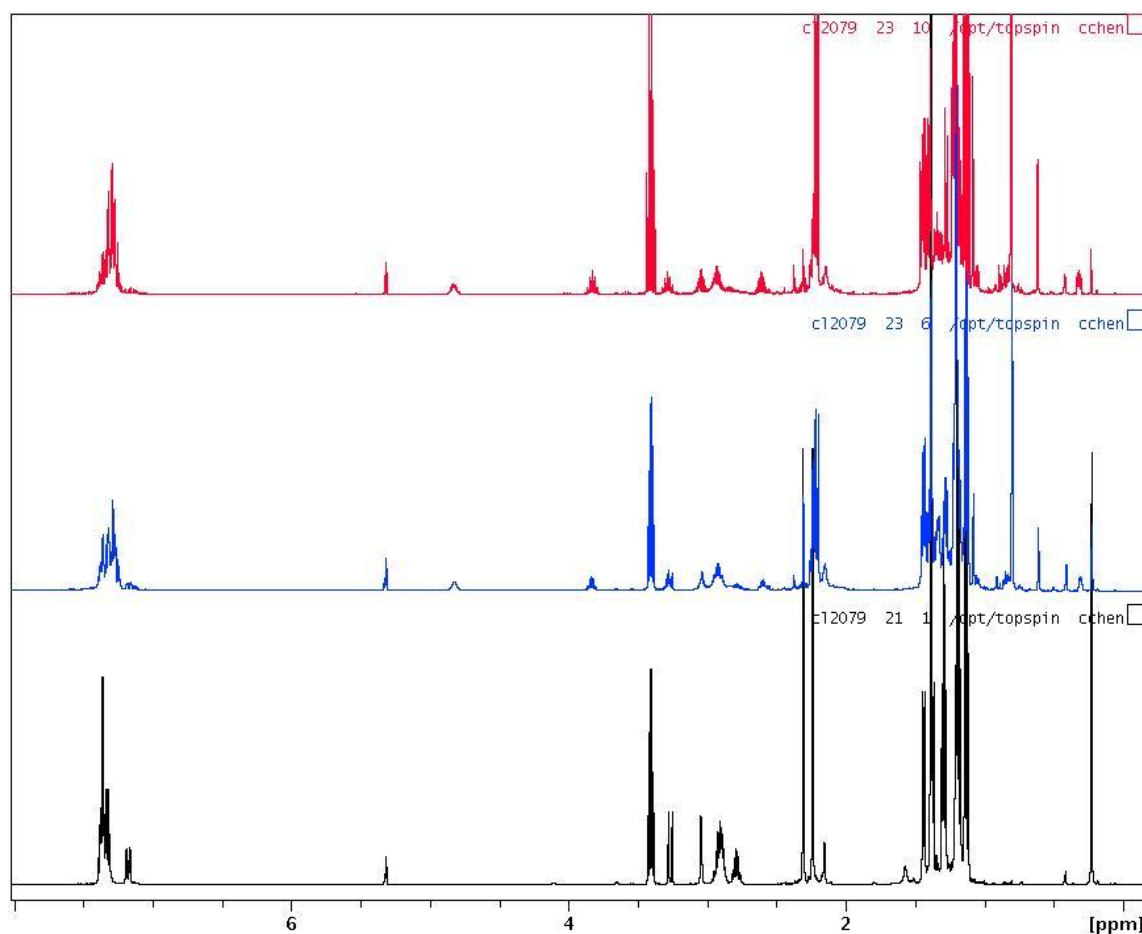

**Figure 10-3e.** Selected spectra for the first-order consumption of  $[(\alpha\text{-diimine})\text{PdMe}(\text{CH}_2=\text{CHO}^t\text{Bu})][\text{SbF}_6]$  (**3a**) at 0 °C: full spectra. The bottom spectrum is the starting point of the reaction, the middle spectrum corresponds to ca. 50% completion and the top spectrum corresponds to ca. 90% completion. For kinetics analysis see Figure 7.1 and Figure 7.2.

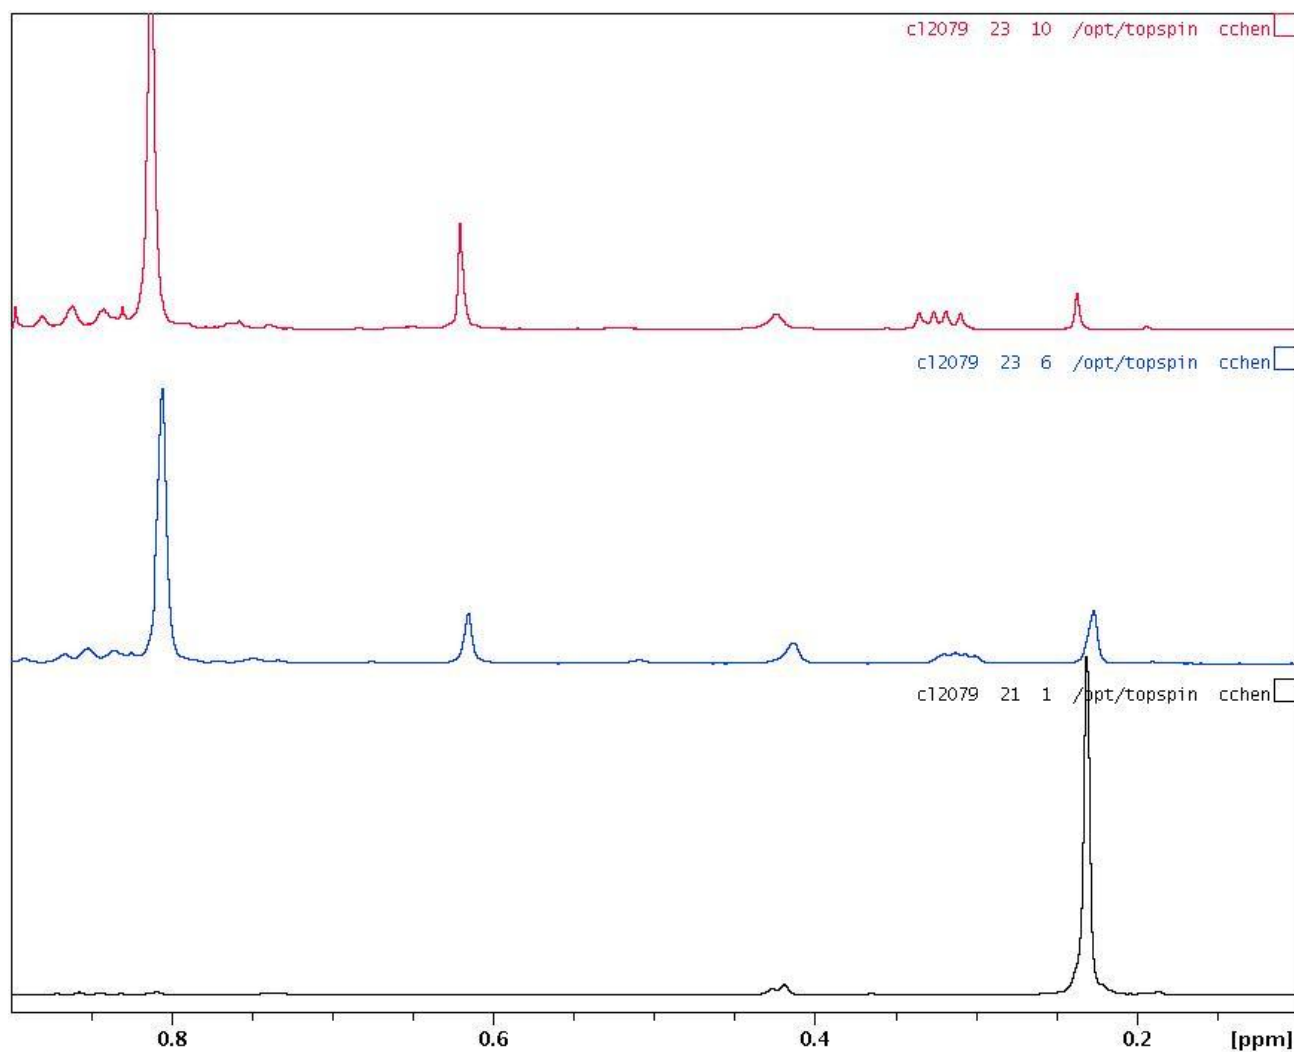

**Figure 10-3f.** Selected spectra for the first-order consumption of  $[(\alpha\text{-diimine})\text{PdMe}(\text{CH}_2=\text{CHO}^t\text{Bu})][\text{SbF}_6]$  (**3a**) at 0 °C: expansion of  $\delta$  0.9-0.1. The bottom spectrum is the starting point of the reaction, the middle spectrum corresponds to ca. 50% completion and the top spectrum corresponds to ca. 90% completion. For kinetics analysis see Figure 7.1 and Figure 7.2.



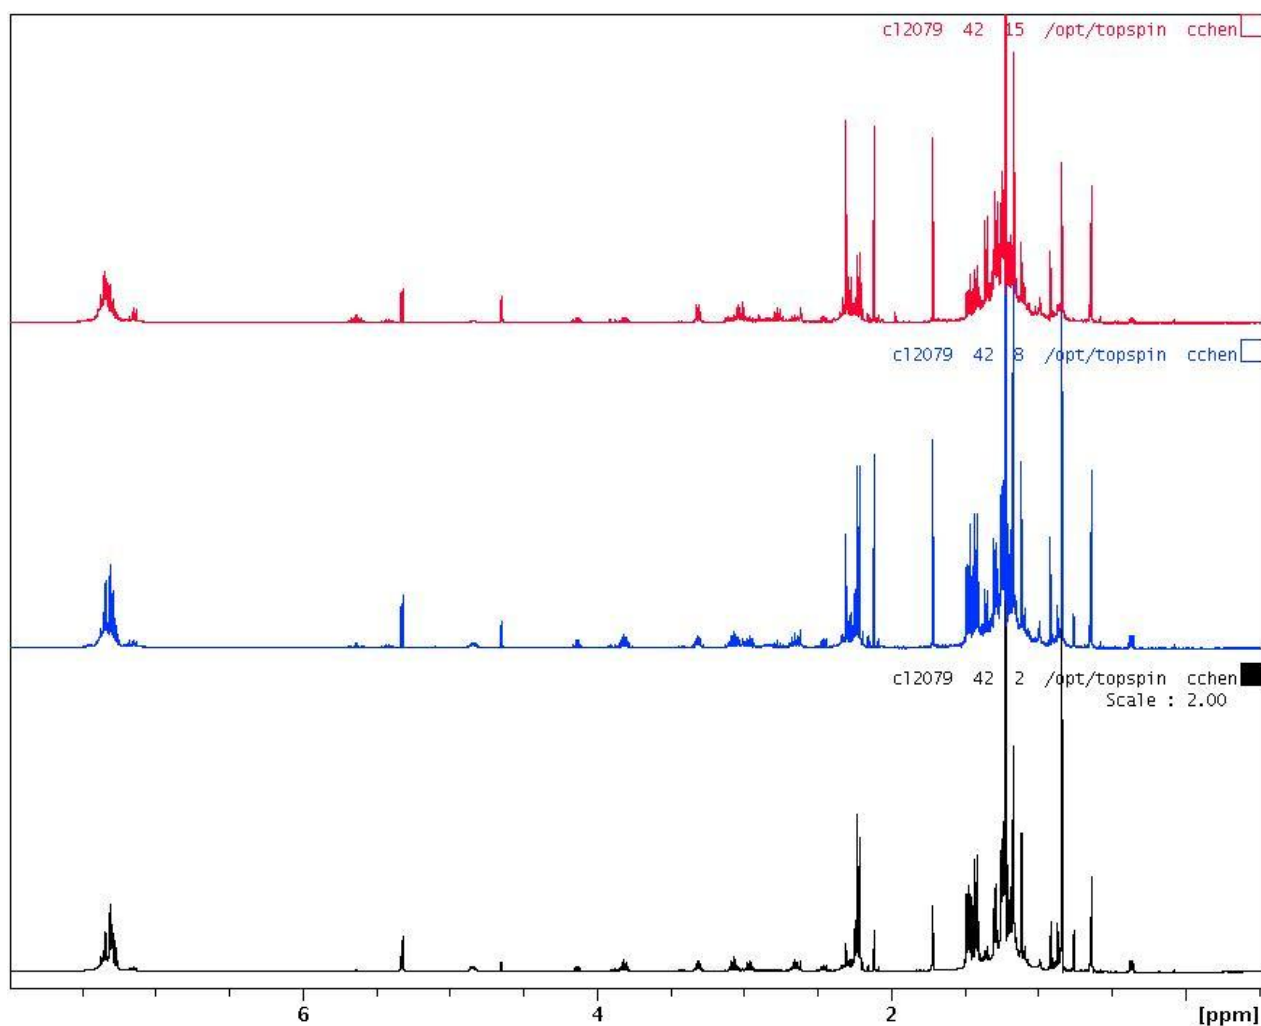

**Figure 10-3g.** Selected spectra for the first-order consumption of  $[(\alpha\text{-diimine})\text{Pd}\{\text{CH}_2\text{CHMe}(\text{O}^t\text{Bu})\}][\text{SbF}_6]$  (**4a**) and  $[(\alpha\text{-diimine})\text{Pd}\{\text{CMe}_2(\text{O}^t\text{Bu})\}][\text{SbF}_6]$  (**5a**) at 20 °C: full spectra. The bottom spectrum is the starting point of the reaction, the middle spectrum corresponds to ca. 50% completion and the top spectrum corresponds to ca. 90% completion. For kinetics analysis see Figure 7.5 and Figure 7.6.

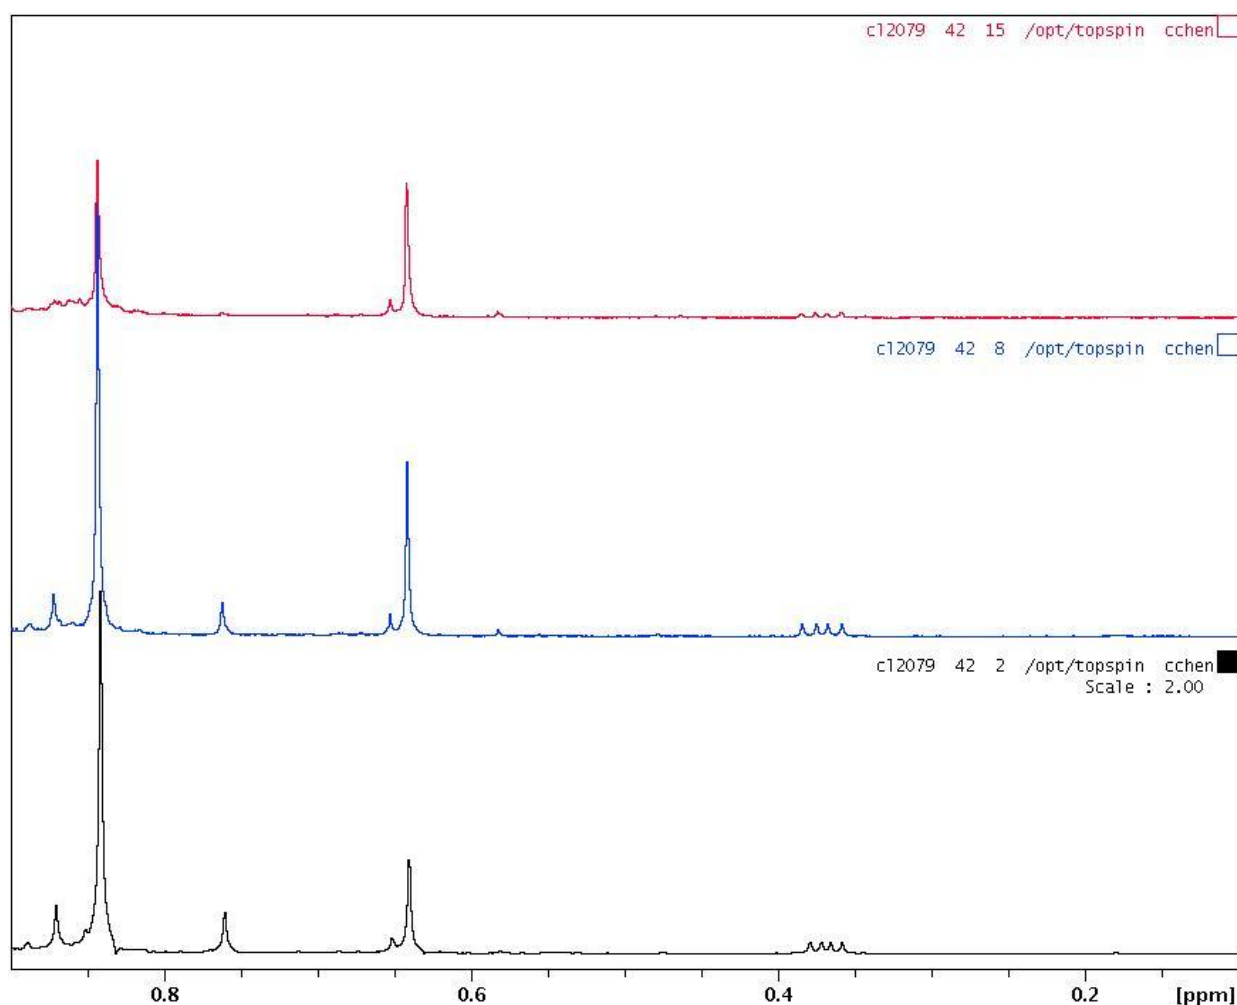

**Figure 10-3h.** Selected spectra for the first-order consumption of  $[(\alpha\text{-diimine})\text{Pd}\{\text{CH}_2\text{CHMe}(\text{O}^t\text{Bu})\}][\text{SbF}_6]$  (**4a**) and  $[(\alpha\text{-diimine})\text{Pd}\{\text{CMe}_2(\text{O}^t\text{Bu})\}][\text{SbF}_6]$  (**5a**) at 20 °C: expansion of  $\delta$  0.9-0.1. The bottom spectrum is the starting point of the reaction, the middle spectrum corresponds to ca. 50% completion and the top spectrum corresponds to ca. 90% completion. For kinetics analysis see Figure 7.5 and Figure 7.6.

#### 10.4 Selected $^1\text{H}$ NMR spectra for $\text{CH}_2=\text{CHOEt}$ case:

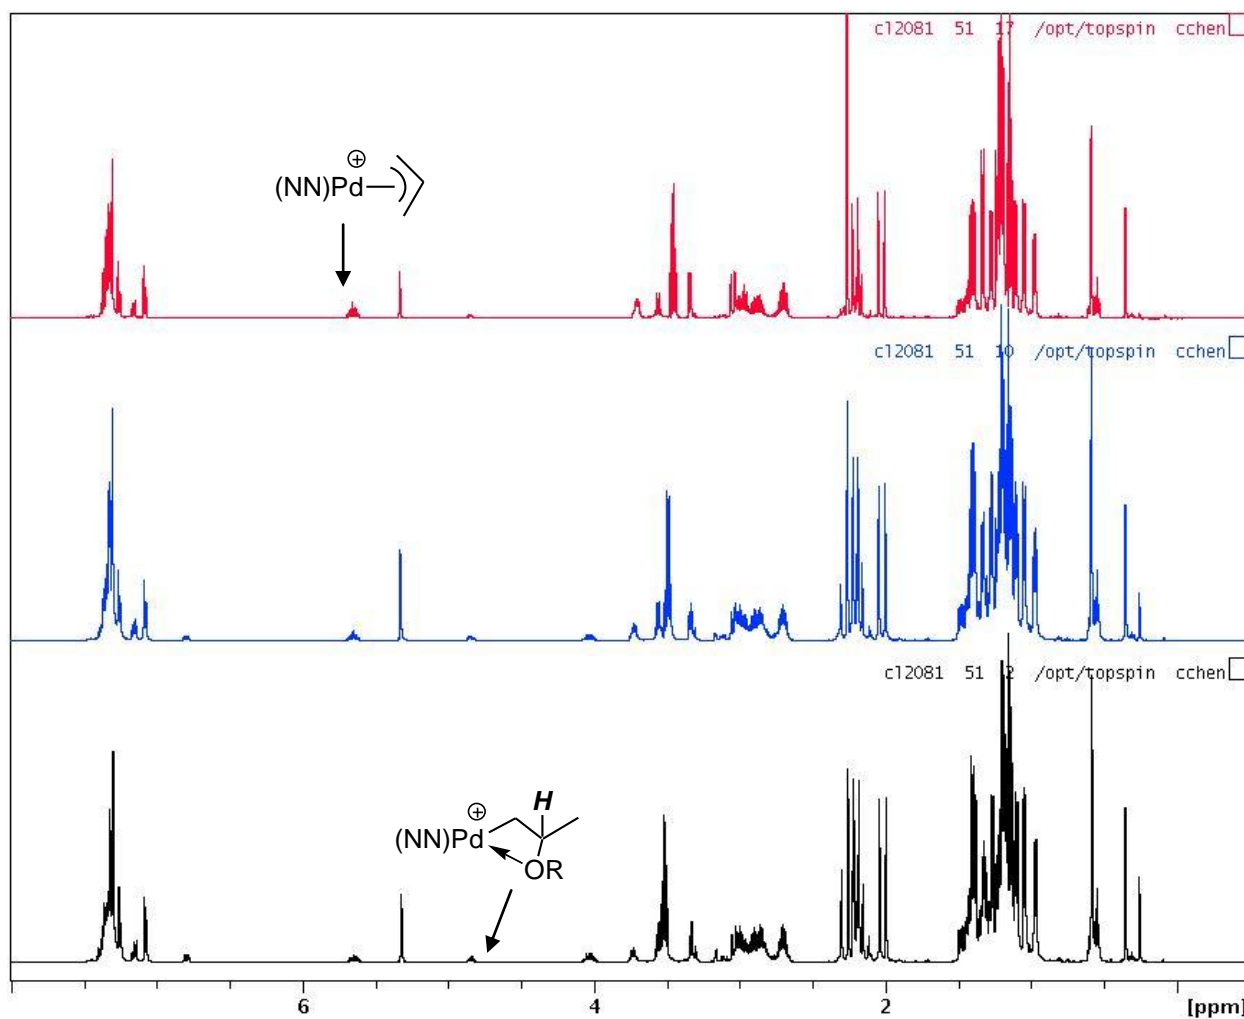

**Figure 10-4a.** Selected spectra for the first-order consumption of  $[(\alpha\text{-diimine})\text{PdMe}(\text{CH}_2=\text{CHOEt})][\text{B}(\text{C}_6\text{F}_5)_4]$  (**3b**) at  $0\text{ }^\circ\text{C}$ : full spectra. The bottom spectrum is the starting point of the reaction, the middle spectrum corresponds to ca. 50% completion and the top spectrum corresponds to ca. 90% completion. For kinetics analysis see Figure 6.1 and Figure 6.2.

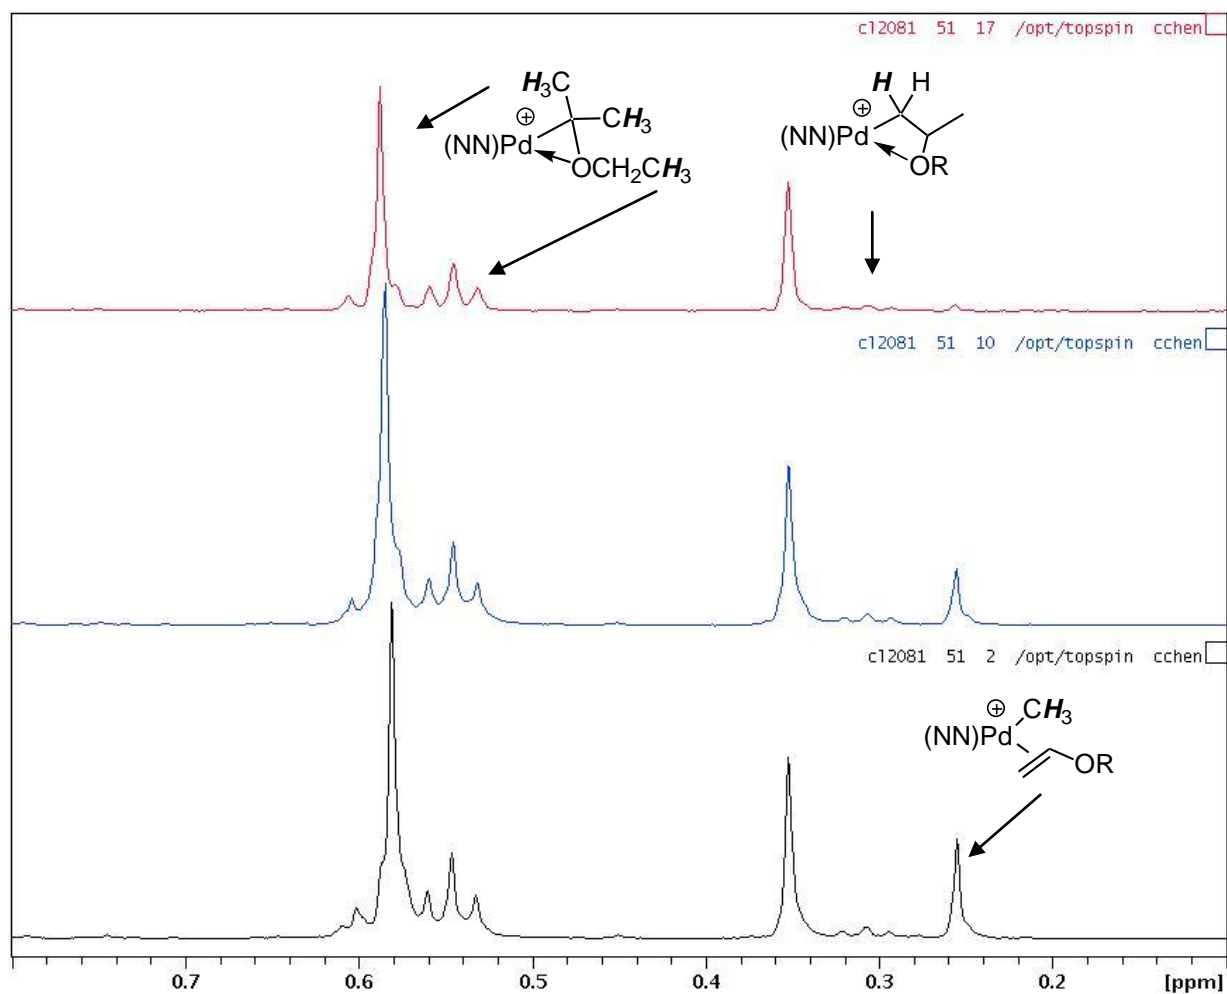

**Figure 10-4b.** Selected spectra for the first-order consumption of  $[(\alpha\text{-diimine})\text{PdMe}(\text{CH}_2=\text{CHOEt})][\text{B}(\text{C}_6\text{F}_5)_4]$  (**3b**) at 0 °C: expansion of  $\delta$  0.8-0.1. The peak at 0.35 is  $[(\alpha\text{-diimine})\text{PdMe}]_2(\mu\text{-Cl})[\text{B}(\text{C}_6\text{F}_5)_4]$ . The bottom spectrum is the starting point of the reaction, the middle spectrum corresponds to ca. 50% completion and the top spectrum corresponds to ca. 90% completion. For kinetics analysis see Figure 6.1 and Figure 6.2.

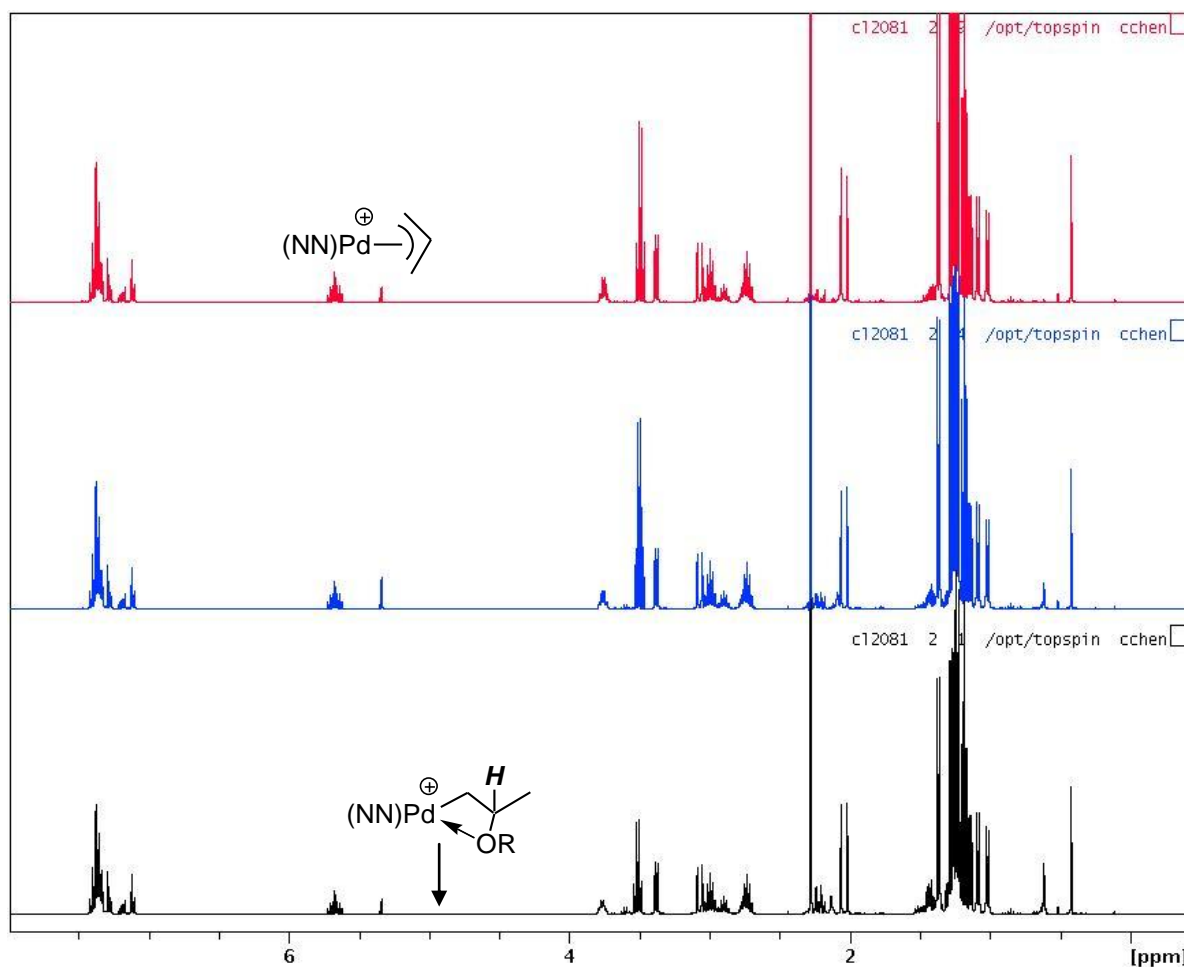

**Figure 10-4c.** Selected spectra for the first-order consumption of  $[(\alpha\text{-diimine})\text{Pd}\{\text{CH}_2\text{CHMe}(\text{OEt})\}][\text{B}(\text{C}_6\text{F}_5)_4]$  (**4b**) and  $[(\alpha\text{-diimine})\text{Pd}\{\text{CMe}_2(\text{OEt})\}][\text{B}(\text{C}_6\text{F}_5)_4]$  (**5b**) at 20 °C: full spectra. The bottom spectrum is the starting point of the reaction, the middle spectrum corresponds to ca. 50% completion and the top spectrum corresponds to ca. 90% completion. For kinetics analysis see Figure 6.5 and Figure 6.6.

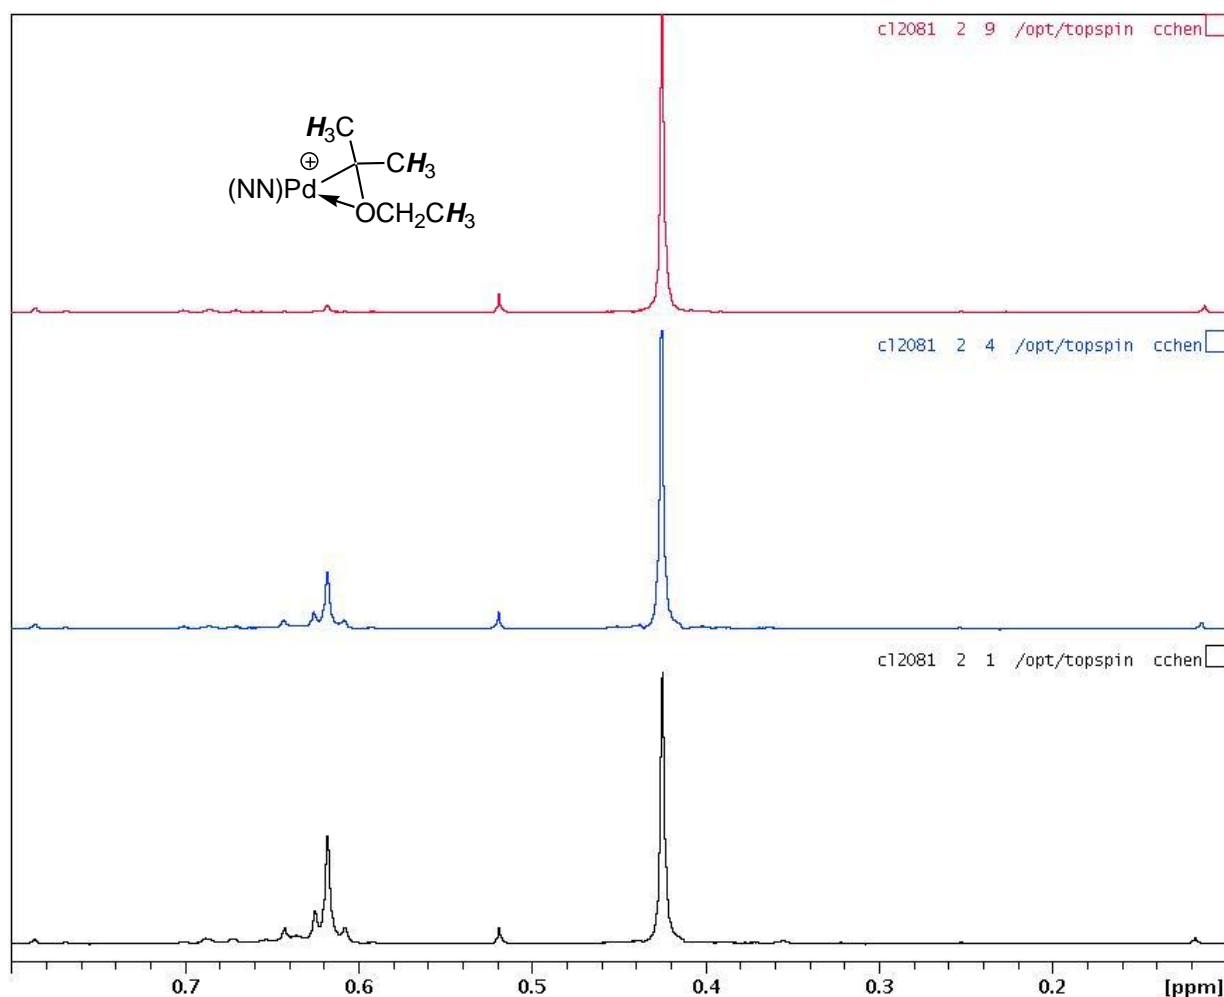

**Figure 10-4d.** Selected spectra for the first-order consumption of  $[(\alpha\text{-diimine})\text{Pd}\{\text{CH}_2\text{CHMe}(\text{OEt})\}][\text{B}(\text{C}_6\text{F}_5)_4]$  (**4b**) and  $[(\alpha\text{-diimine})\text{Pd}\{\text{CMe}_2(\text{OEt})\}][\text{B}(\text{C}_6\text{F}_5)_4]$  (**5b**) at 20 °C: expansion of  $\delta$  0.8-0.1. The peak at 0.42 is  $[(\alpha\text{-diimine})\text{PdMe}_2(\mu\text{-Cl})][\text{B}(\text{C}_6\text{F}_5)_4]$ . The bottom spectrum is the starting point of the reaction, the middle spectrum corresponds to ca. 50% completion and the top spectrum corresponds to ca. 90% completion. For kinetics analysis see Figure 6.5 and Figure 6.6.

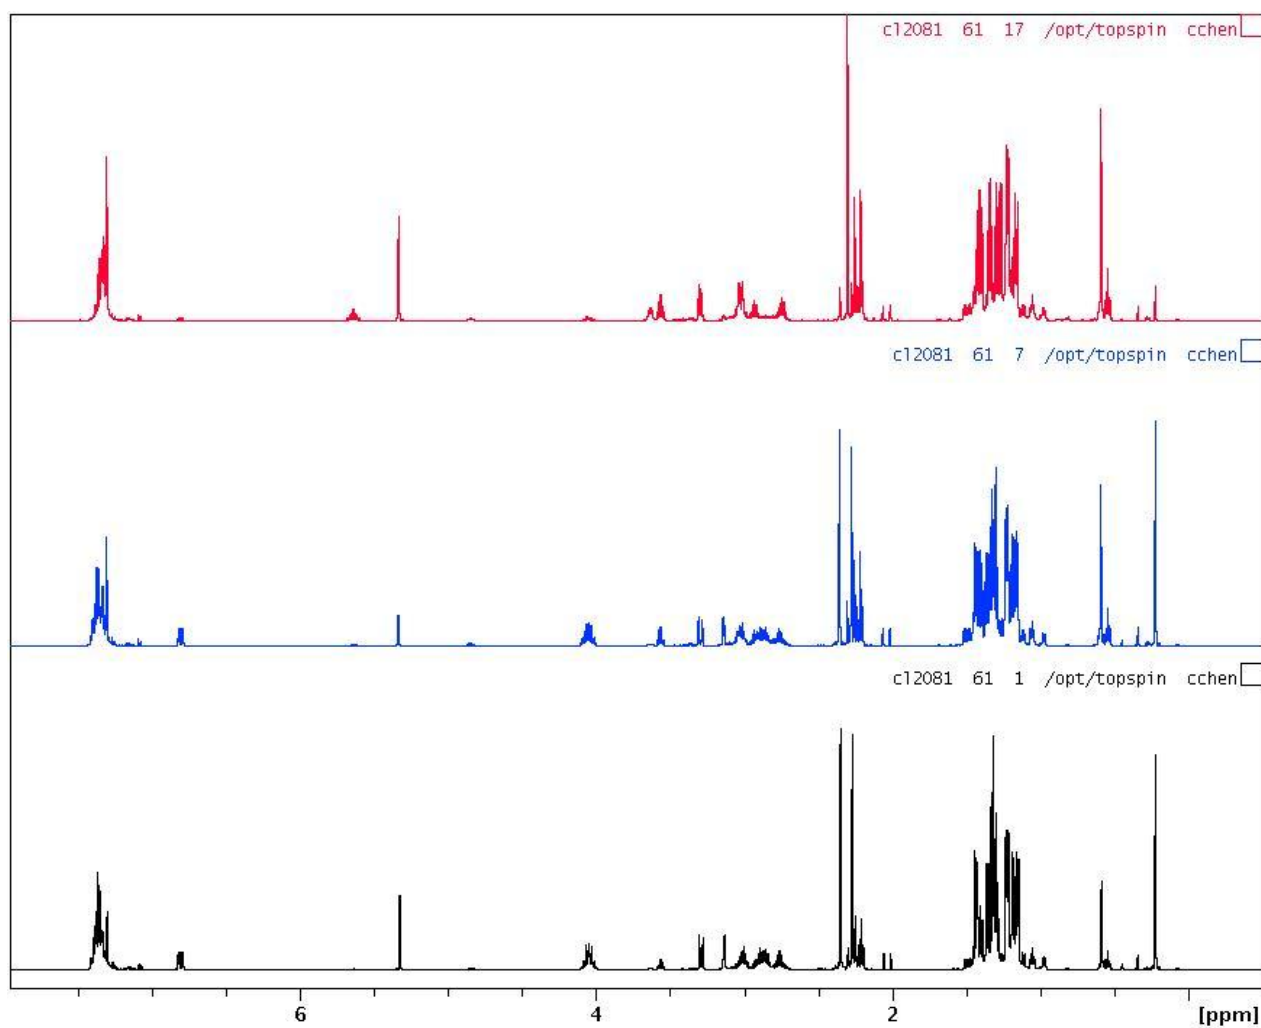

**Figure 10-4e.** Selected spectra for the first-order consumption of  $[(\alpha\text{-diimine})\text{PdMe}(\text{CH}_2=\text{CHOEt})][\text{SbF}_6]$  (**3b**) at 0 °C: full spectra. The bottom spectrum is the starting point of the reaction, the middle spectrum corresponds to ca. 50% completion and the top spectrum corresponds to ca. 90% completion. For kinetics analysis see Figure 7.7 and Figure 7.8.

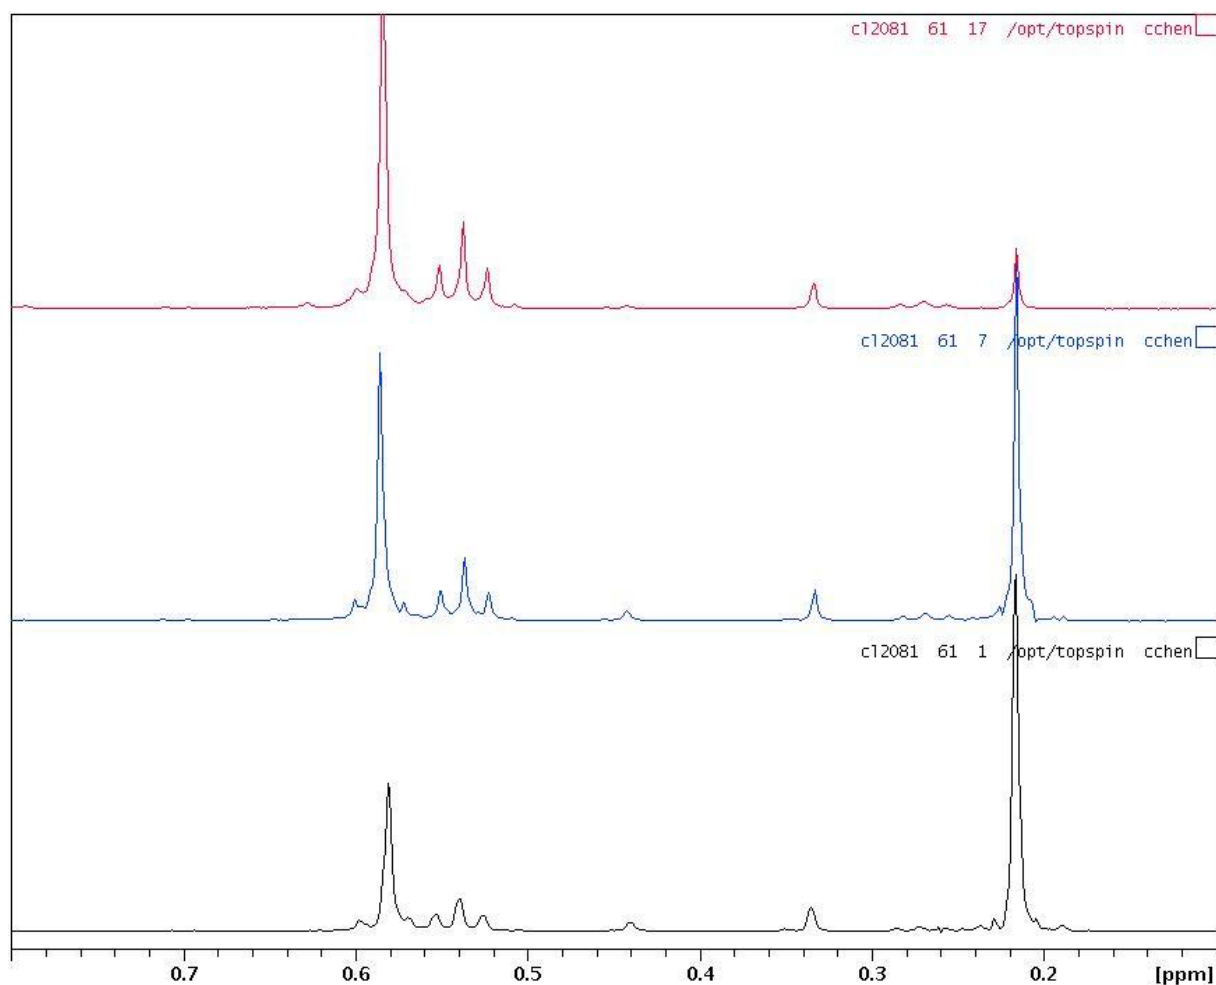

**Figure 10-4f.** Selected spectra for the first-order consumption of  $[(\alpha\text{-diimine})\text{PdMe}(\text{CH}_2=\text{CHOEt})][\text{SbF}_6]$  (**3b**) at 0 °C: expansion of  $\delta$  0.8-0.1. The bottom spectrum is the starting point of the reaction, the middle spectrum corresponds to ca. 50% completion and the top spectrum corresponds to ca. 90% completion. For kinetics analysis see Figure 7.7 and Figure 7.8.



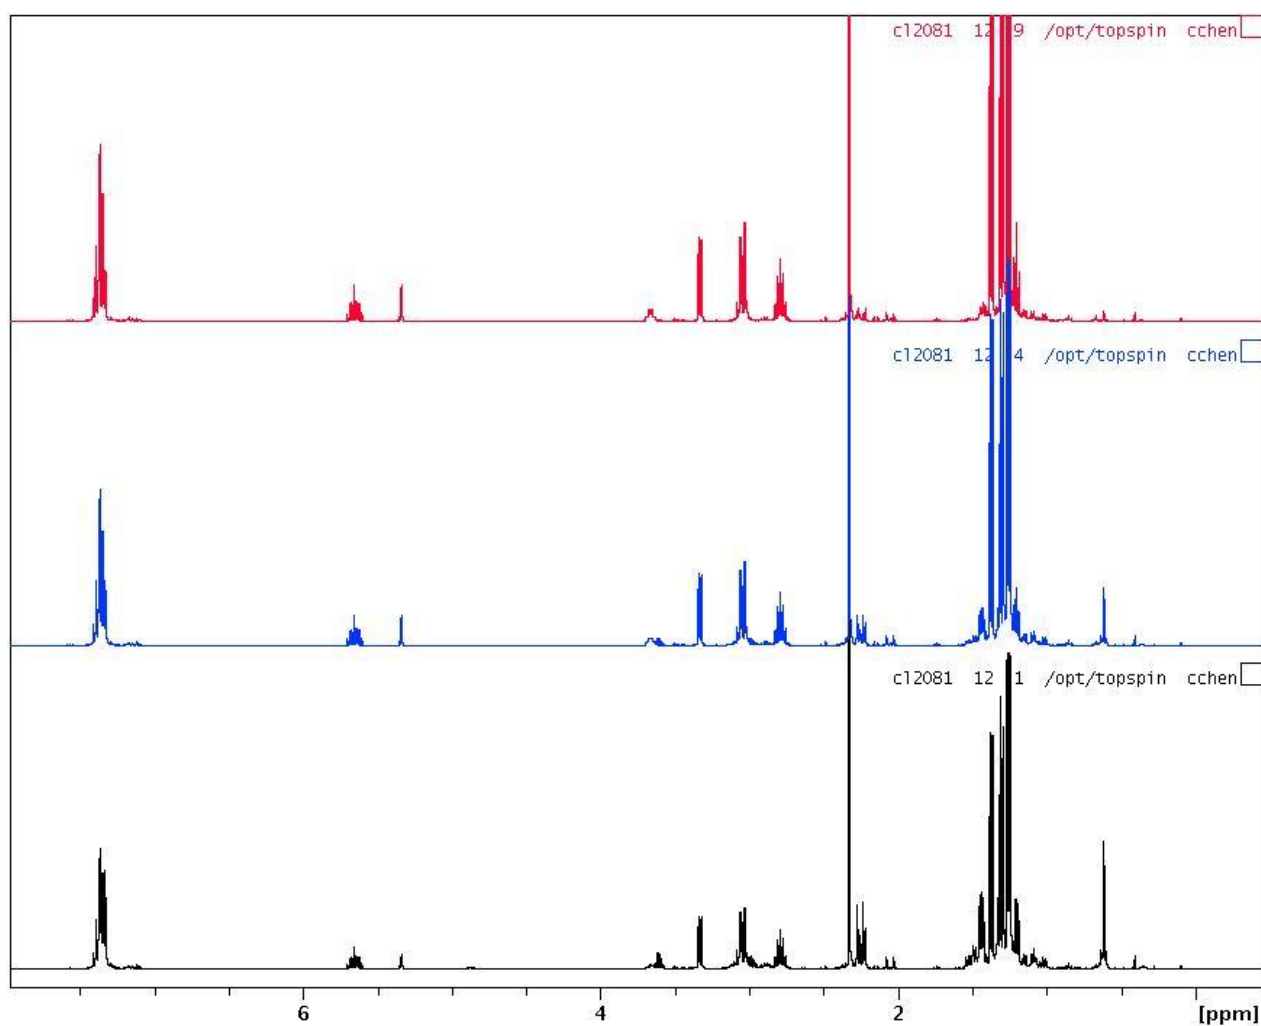

**Figure 10-4g.** Selected spectra for the first-order consumption of  $[(\alpha\text{-diimine})\text{Pd}\{\text{CH}_2\text{CHMe}(\text{OEt})\}][\text{SbF}_6]$  (**4b**) and  $[(\alpha\text{-diimine})\text{Pd}\{\text{CMe}_2(\text{OEt})\}][\text{SbF}_6]$  (**5b**) at 20 °C: full spectra. The bottom spectrum is the starting point of the reaction, the middle spectrum corresponds to ca. 50% completion and the top spectrum corresponds to ca. 90% completion. For kinetics analysis see Figure 7.11 and Figure 7.12.

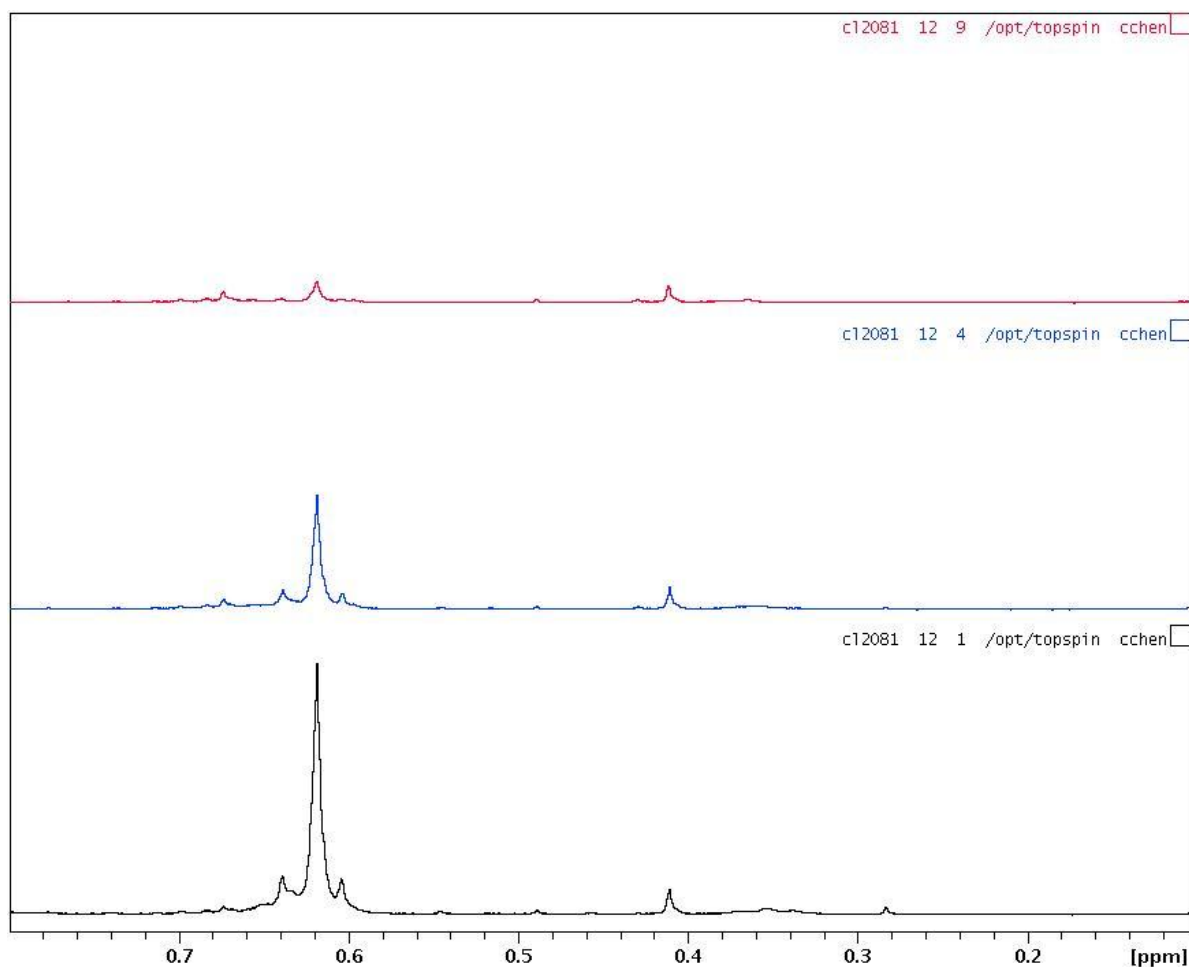

**Figure 10-4h.** Selected spectra for the first-order consumption of  $[(\alpha\text{-diimine})\text{Pd}\{\text{CH}_2\text{CHMe}(\text{OEt})\}][\text{SbF}_6]$  (**4b**) and  $[(\alpha\text{-diimine})\text{Pd}\{\text{CMe}_2(\text{OEt})\}][\text{SbF}_6]$  (**5b**) at 20 °C: expansion of  $\delta$  0.8-0.1. The bottom spectrum is the starting point of the reaction, the middle spectrum corresponds to ca. 50% completion and the top spectrum corresponds to ca. 90% completion. For kinetics analysis see Figure 7.11 and Figure 7.12.

### 10. 5 Selected $^1\text{H}$ NMR spectra for $\text{CH}_2=\text{CHOSiMe}_3$ case:

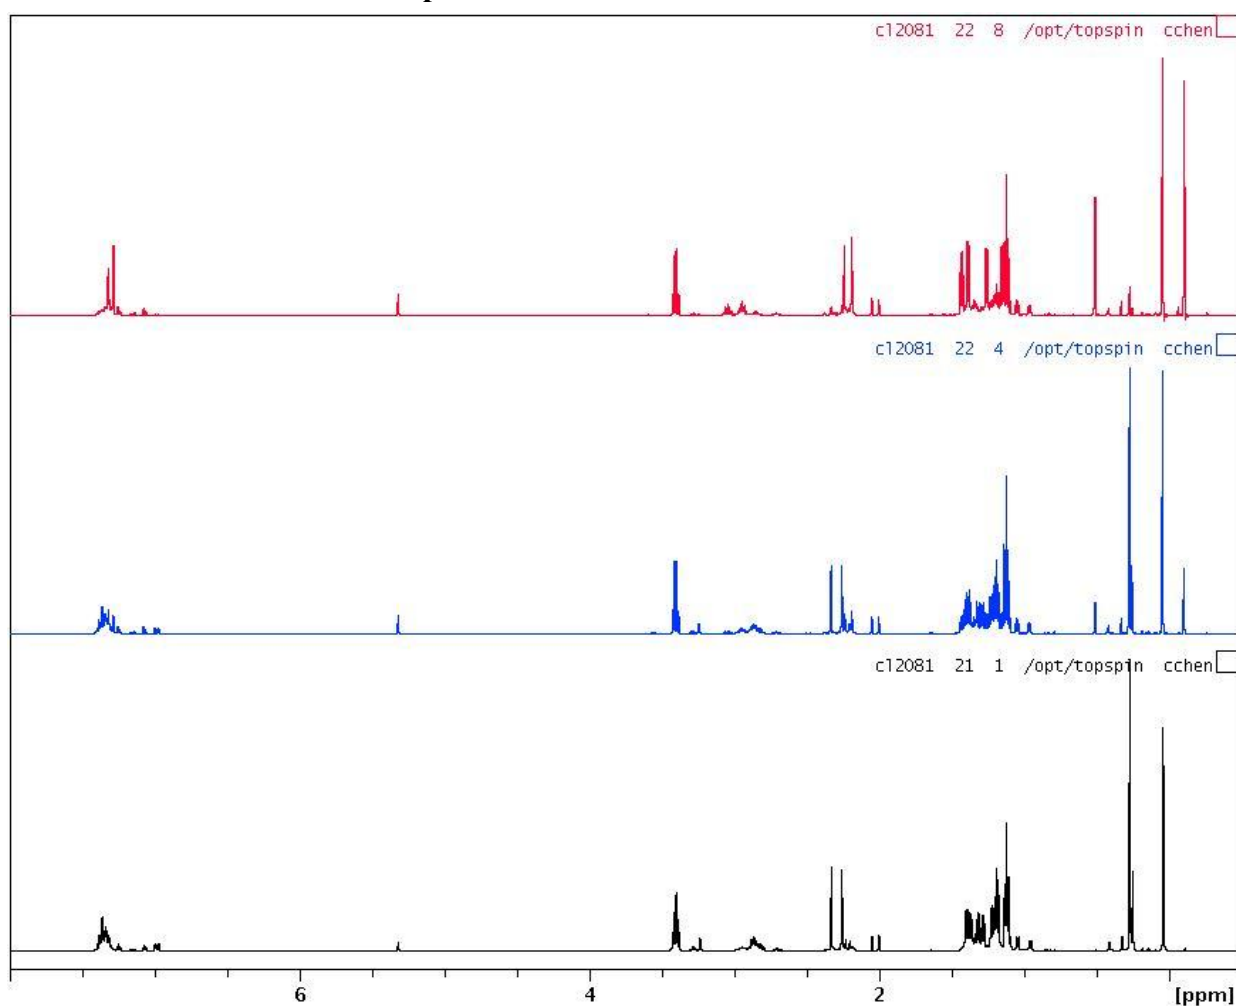

**Figure 10-5a.** Selected spectra for the first-order consumption of  $[(\alpha\text{-diimine})\text{PdMe}(\text{CH}_2=\text{CHOSiMe}_3)][\text{SbF}_6]$  (**3c**) at 0 °C: expansion of  $\delta$  0.8-0.1. The bottom spectrum is the starting point of the reaction, the middle spectrum corresponds to ca. 50% completion and the top spectrum corresponds to ca. 90% completion. For kinetics analysis see Figure 6.15 and Figure 6.16.

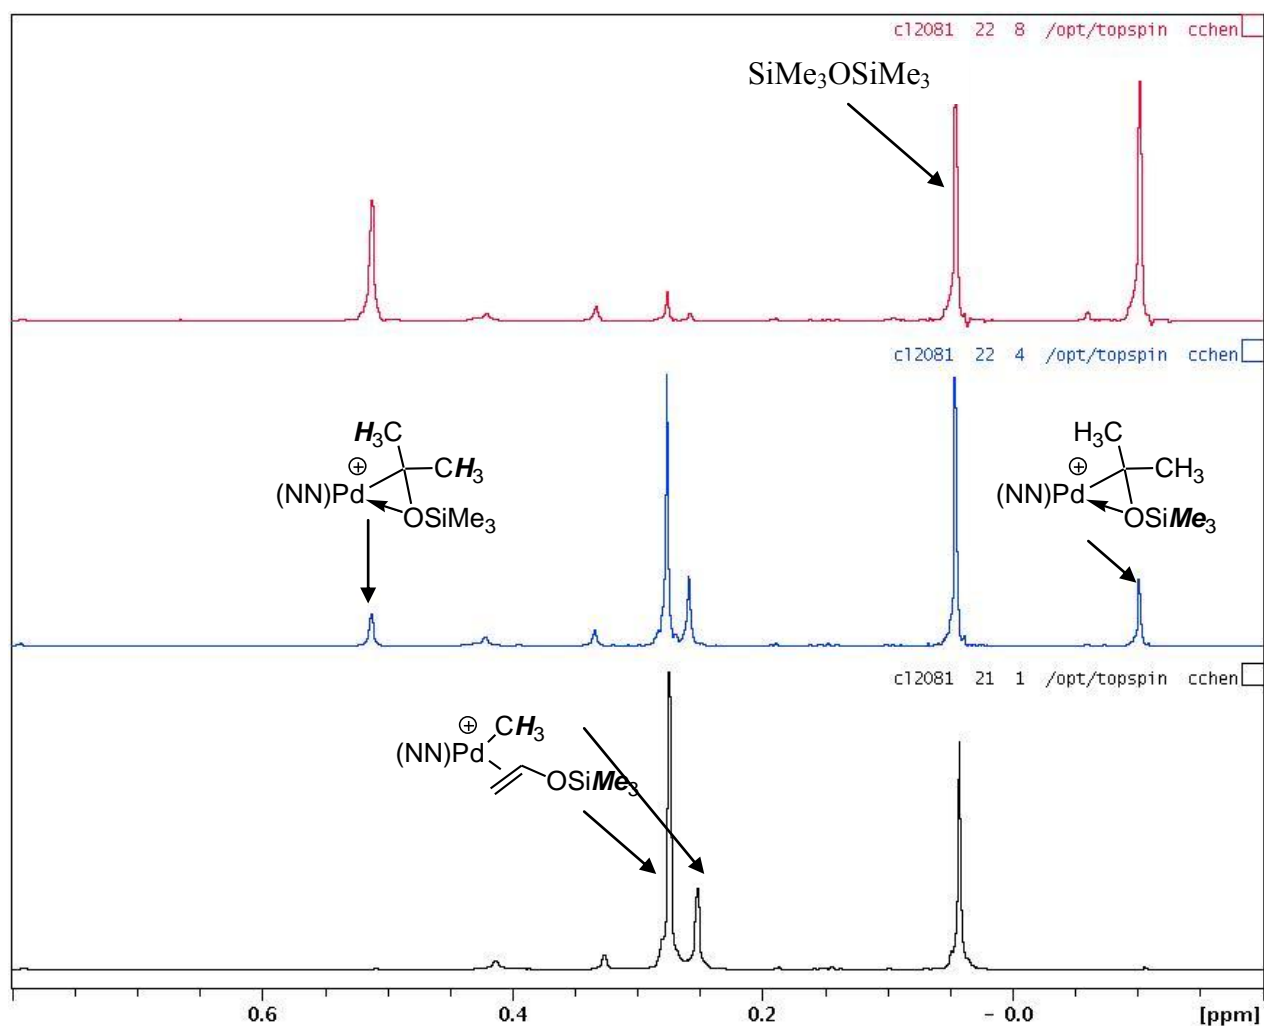

**Figure 10-5b.** Selected spectra for the first-order consumption of  $[(\alpha\text{-diimine})\text{PdMe}(\text{CH}_2=\text{CHOSiMe}_3)][\text{SbF}_6]$  (**3c**) at 0 °C: expansion of  $\delta$  0.8 - -0.2. The bottom spectrum is the starting point of the reaction, the middle spectrum corresponds to ca. 50% completion and the top spectrum corresponds to ca. 90% completion. For kinetics analysis see Figure 6.15 and Figure 6.16.

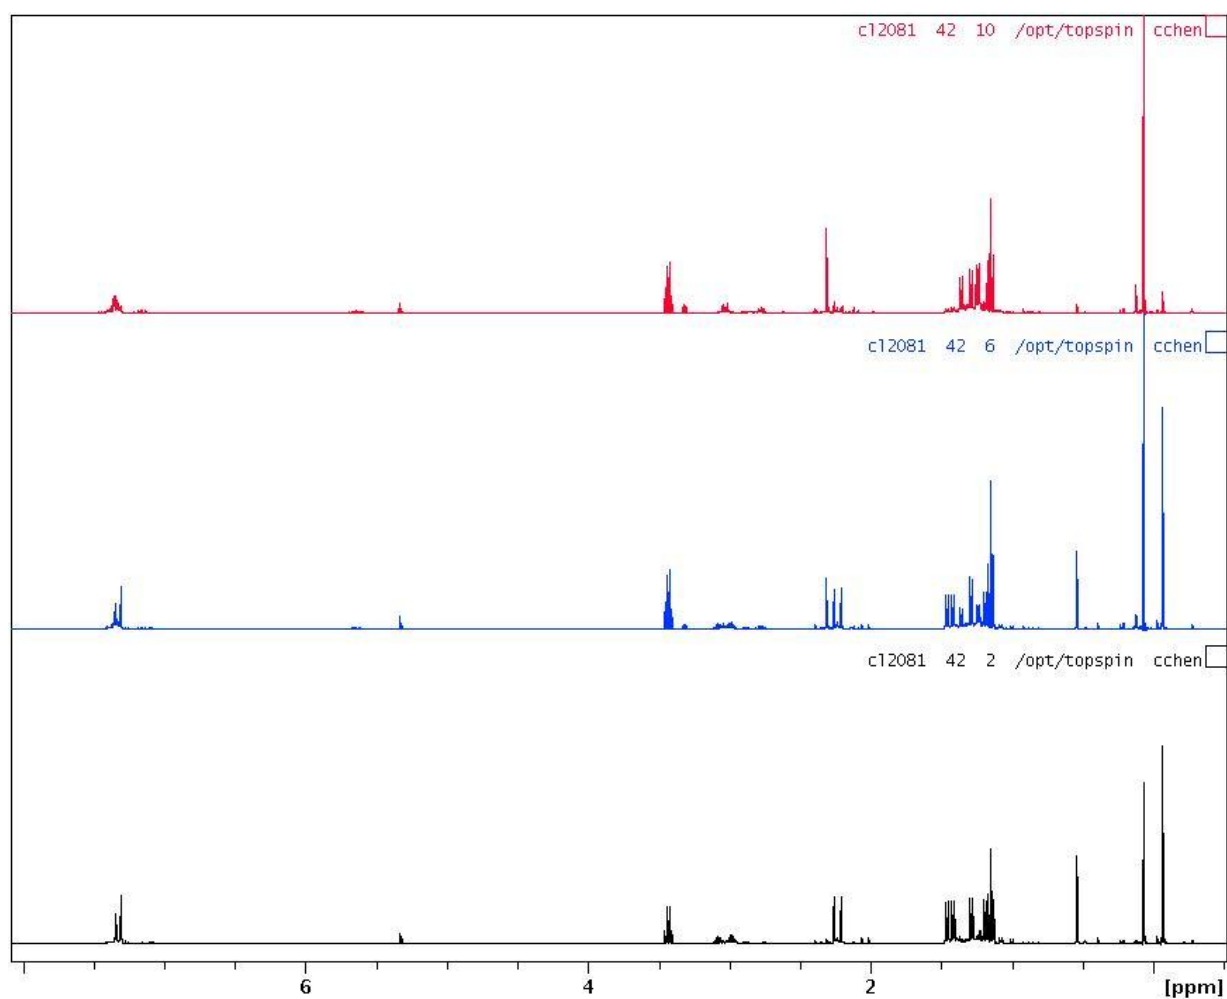

**Figure 10-5c.** Selected spectra for the first-order consumption of  $[(\alpha\text{-diimine})\text{Pd}\{\text{CMe}_2(\text{OSiMe}_3)\}][\text{SbF}_6]$  (**5c**) at 20 °C: full spectra. The bottom spectrum is the starting point of the reaction, the middle spectrum corresponds to ca. 50% completion and the top spectrum corresponds to ca. 90% completion. For kinetics analysis see Figure 6.17 and Figure 6.18.

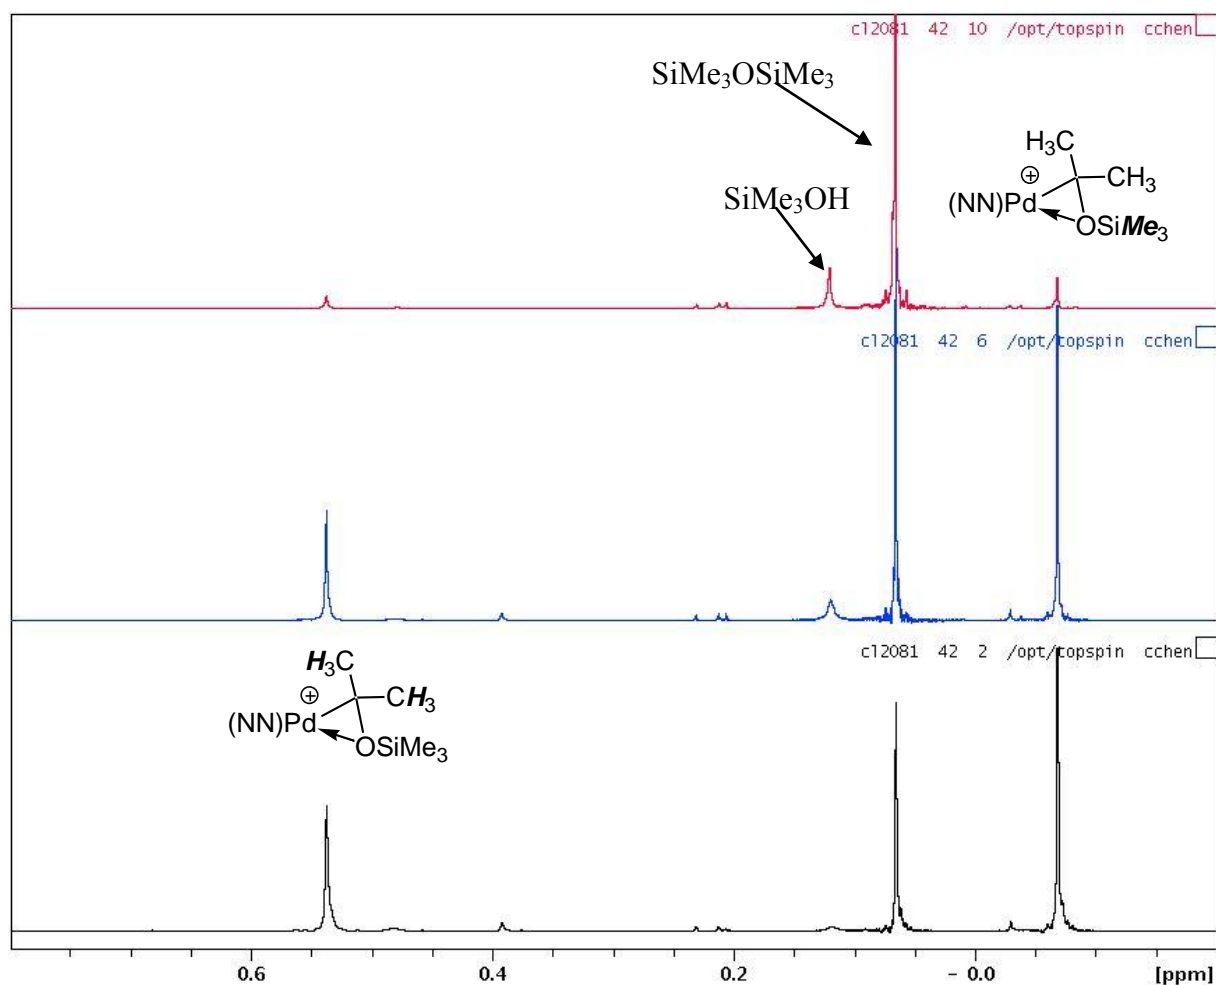

**Figure 10-5d.** Selected spectra for the first-order consumption of  $[(\alpha\text{-diimine})\text{Pd}\{\text{CMe}_2(\text{OSiMe}_3)\}][\text{SbF}_6]$  (**5c**) at 20 °C: expansion of  $\delta$  0.8 - -0.2. The bottom spectrum is the starting point of the reaction, the middle spectrum corresponds to ca. 50% completion and the top spectrum corresponds to ca. 90% completion. For kinetics analysis see Figure 6.17 and Figure 6.18.

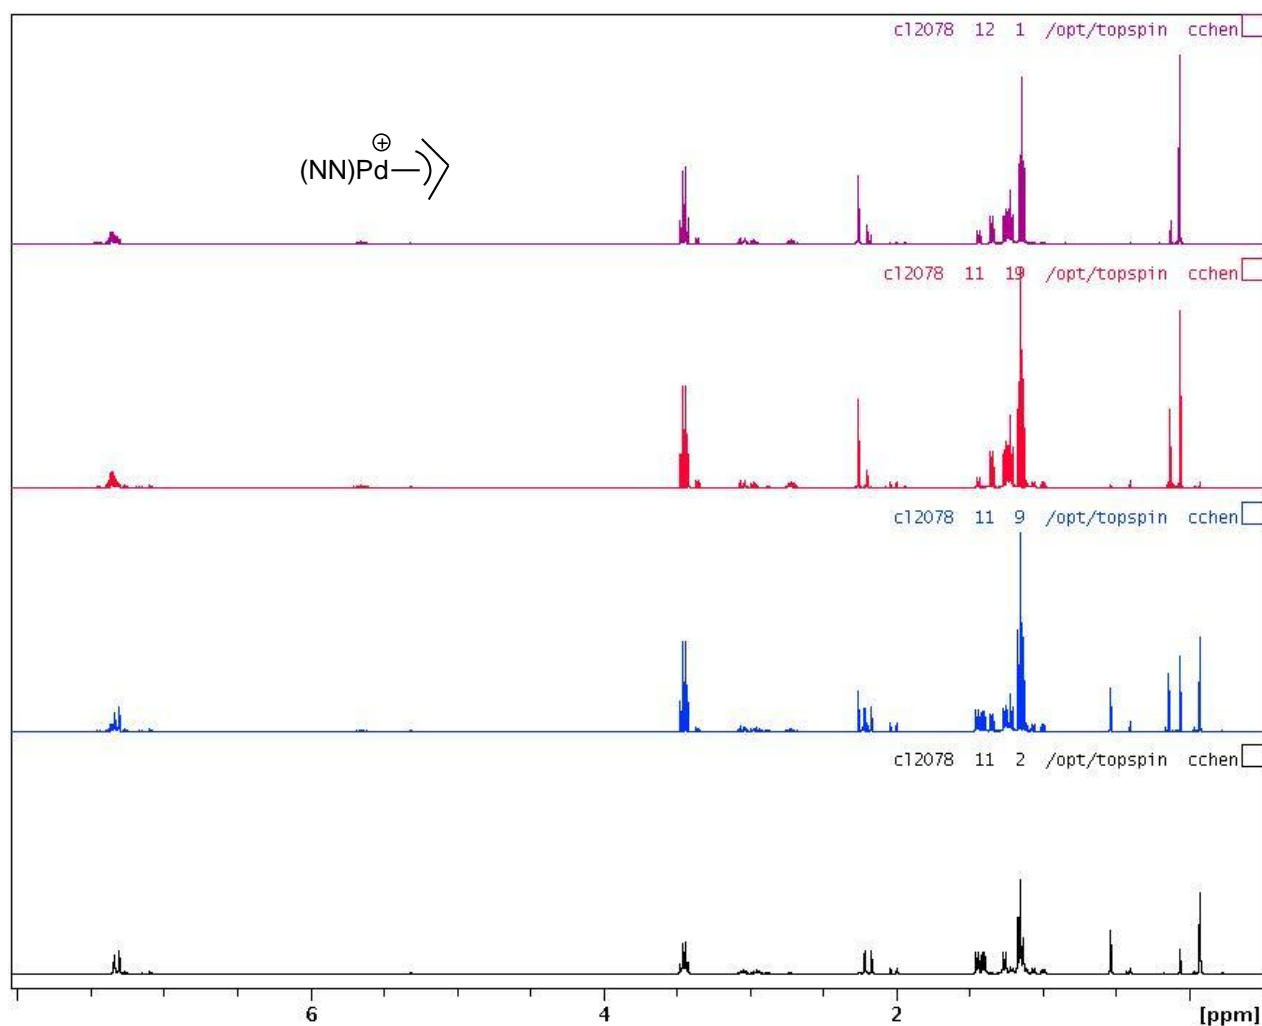

**Figure 10-5e..** Selected spectra for the first-order consumption of  $[(\alpha\text{-diimine})\text{Pd}\{\text{CMe}_2(\text{OSiMe}_3)\}][\text{B}(\text{C}_6\text{F}_5)_4]$  (**5c**) at 20 °C: full spectra. The bottom spectrum is the starting point of the reaction, the second to the bottom spectrum corresponds to ca. 50% completion and the second to the top spectrum corresponds to ca. 90% completion. The top spectrum shows the conversion of  $\text{Me}_3\text{SiOH}$  to  $\text{Me}_3\text{SiOSiMe}_3$ . For kinetics analysis see Figure 6.7 and Figure 6.8.

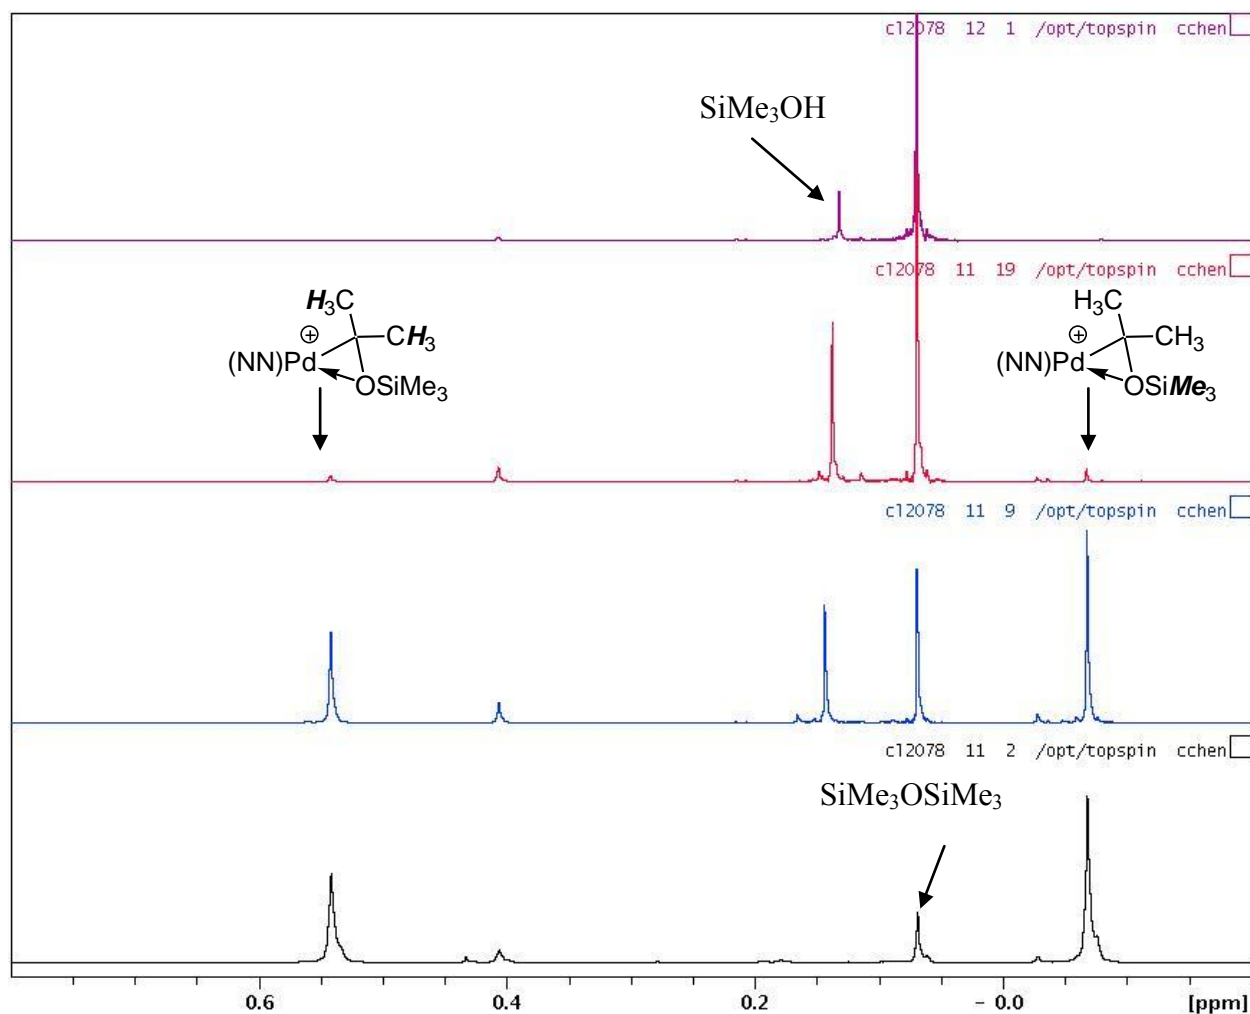

**Figure 10-5f.** Selected spectra for the first-order consumption of  $[(\alpha\text{-diimine})\text{Pd}\{\text{CMe}_2(\text{OSiMe}_3)\}][\text{B}(\text{C}_6\text{F}_5)_4]$  (**5c**) at 20 °C: expansion of  $\delta$  0.8 - -0.2. The bottom spectrum is the starting point of the reaction, the second to the bottom spectrum corresponds to ca. 50% completion and the second to the top spectrum corresponds to ca. 90% completion. The top spectrum shows the conversion of  $\text{Me}_3\text{SiOH}$  to  $\text{Me}_3\text{SiOSiMe}_3$ . For kinetics analysis see Figure 6.7 and Figure 6.8.



### 10.6 Selected $^1\text{H}$ NMR spectra for $\text{CH}_2=\text{CHSiMe}_2\text{Ph}$ case.

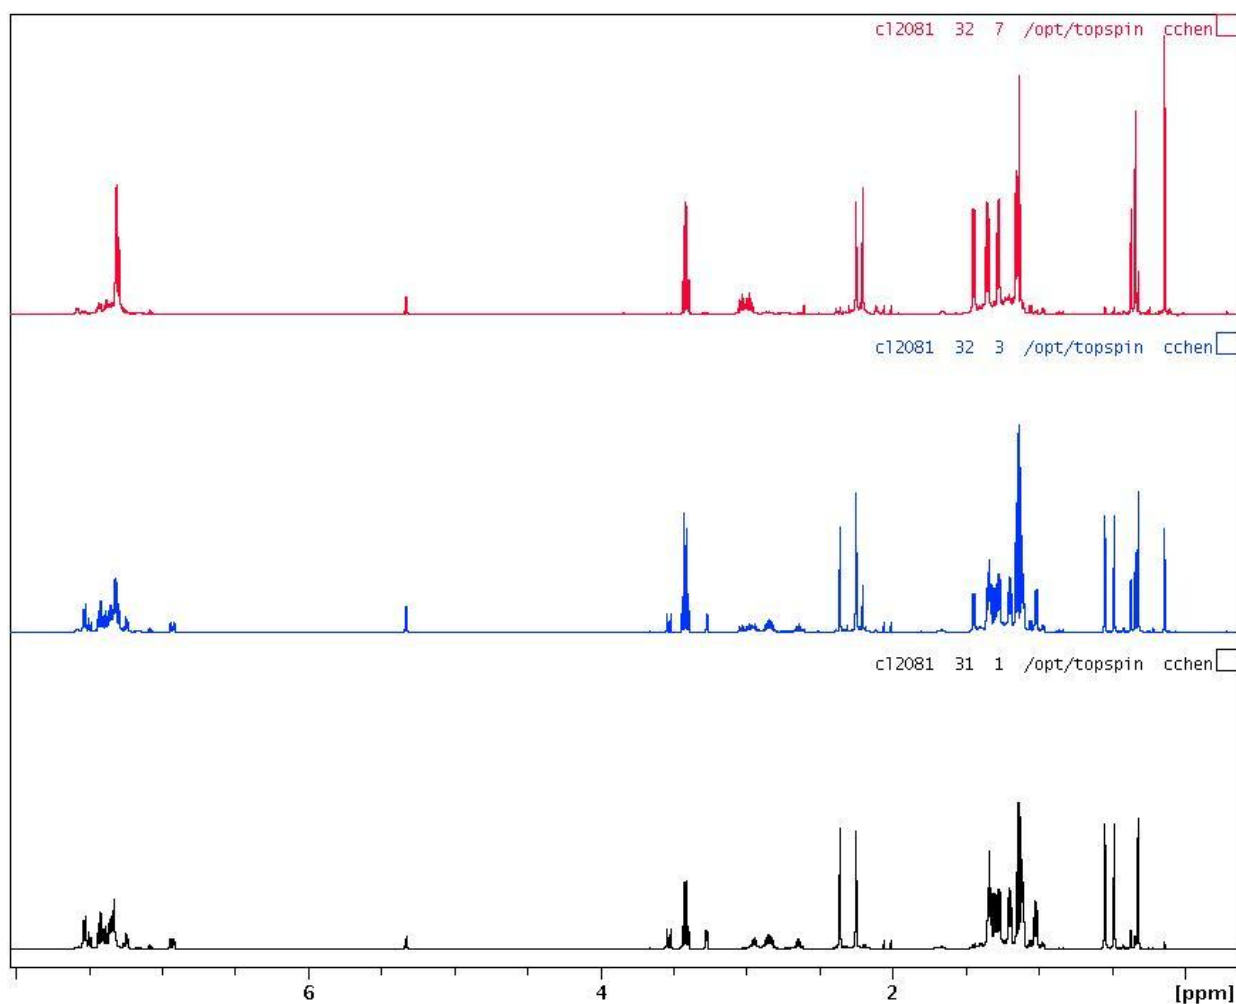

**Figure 10-6a.** Selected spectra for the first-order consumption of  $[(\alpha\text{-diimine})\text{PdMe}(\text{CH}_2=\text{CHOSiMe}_2\text{Ph})][\text{SbF}_6]$  (**3d**) at  $0\text{ }^\circ\text{C}$ : full spectra. The bottom spectrum is the starting point of the reaction, the middle spectrum corresponds to ca. 50% completion and the top spectrum corresponds to ca. 90% completion. For kinetics analysis see Figure 6.19 and Figure 6.20.

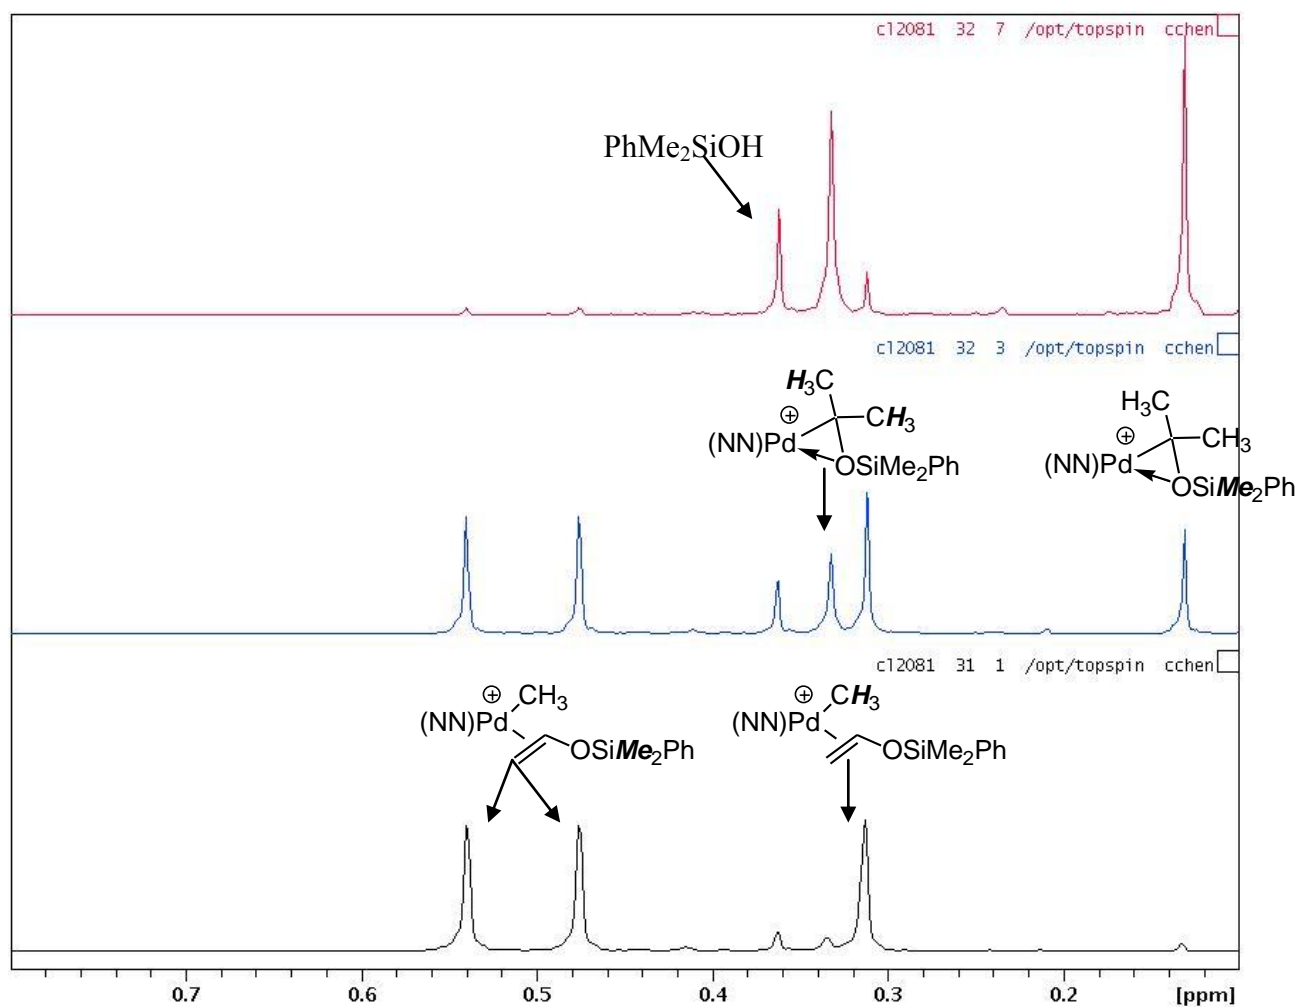

**Figure 10-6b.** Selected spectra for the first-order consumption of  $[(\alpha\text{-diimine})\text{PdMe}(\text{CH}_2=\text{CHOSiMe}_2\text{Ph})][\text{SbF}_6]$  (**3d**) at 0 °C: expansion of  $\delta$  0.8-0.1. The bottom spectrum is the starting point of the reaction, the middle spectrum corresponds to ca. 50% completion and the top spectrum corresponds to ca. 90% completion. For kinetics analysis see Figure 6.19 and Figure 6.20.

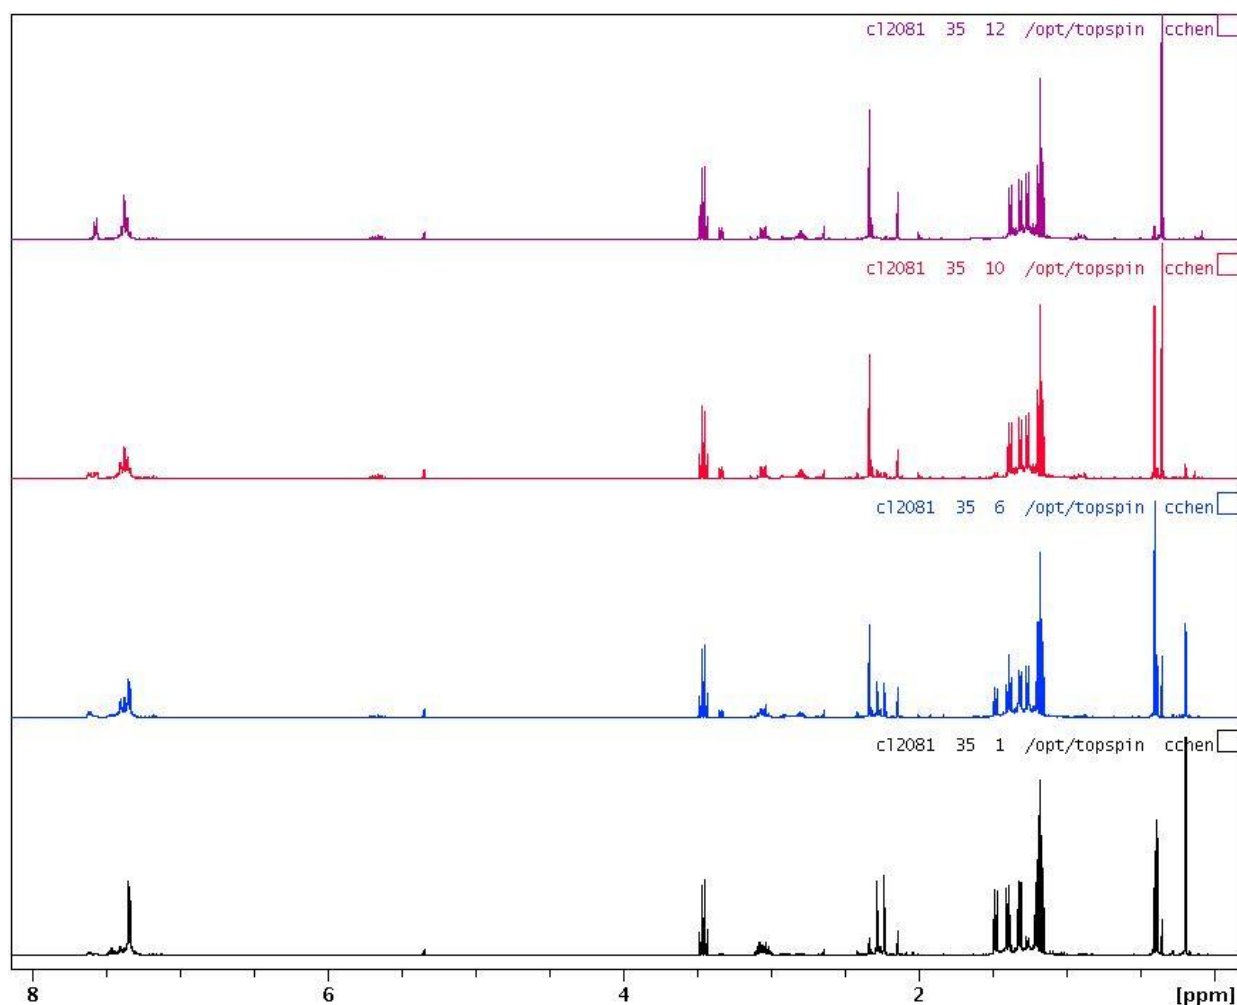

**Figure 10-6c.** Selected spectra for the first-order consumption of  $[(\alpha\text{-diimine})\text{Pd}\{\text{CMe}_2(\text{OSiMe}_2\text{Ph})\}][\text{SbF}_6]$  (**5d**) at 20 °C: full spectra. The bottom spectrum is the starting point of the reaction, the second to the bottom spectrum corresponds to ca. 50% completion and the second to the top spectrum corresponds to ca. 90% completion. The top spectrum shows the conversion of  $\text{PhMe}_2\text{SiOH}$  to  $\text{PhMe}_2\text{SiOSiMe}_2\text{Ph}$ . For kinetics analysis see Figure 6.21 and Figure 6.22.

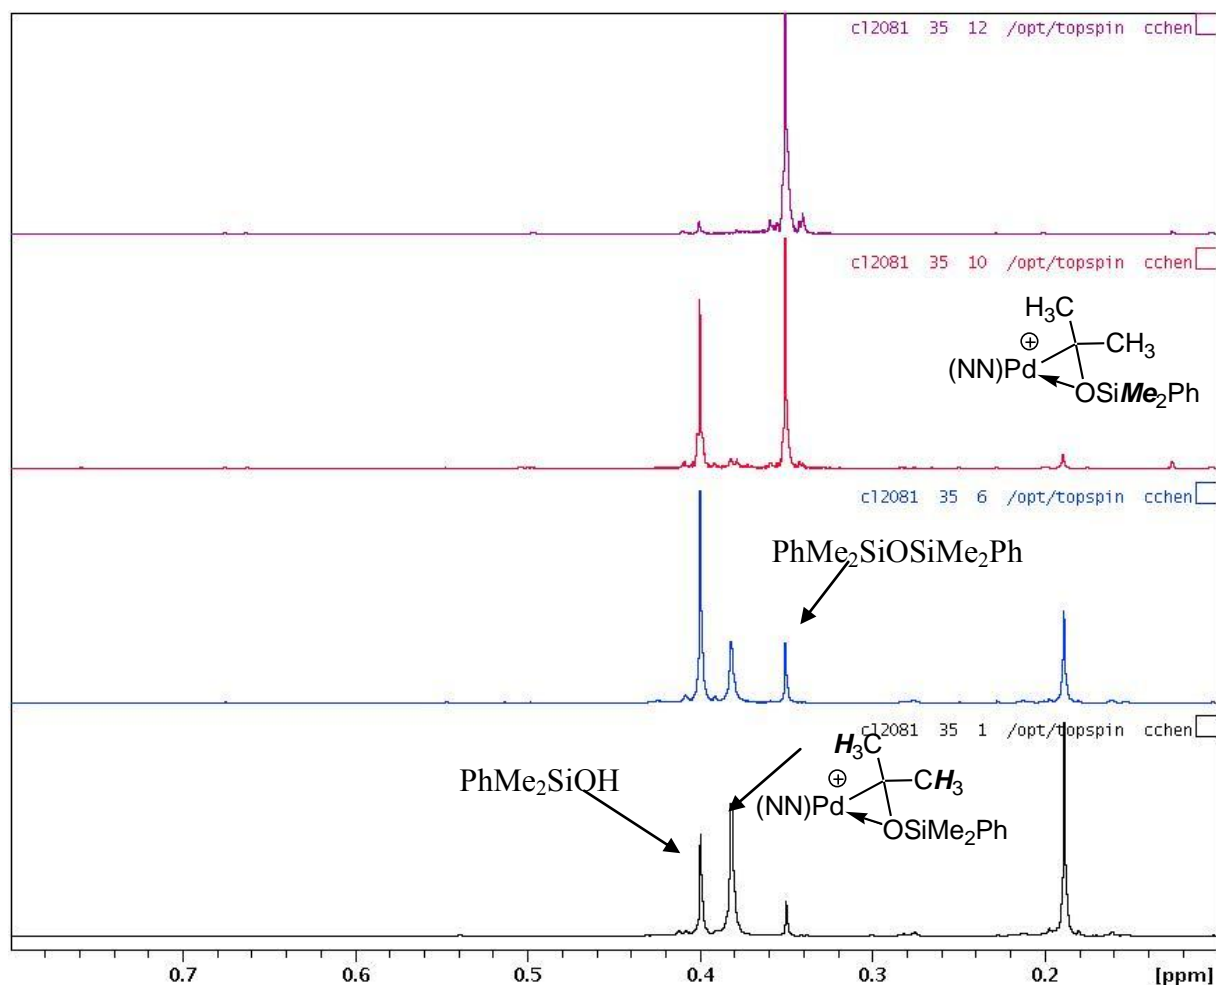

**Figure 10-6d.** Selected spectra for the first-order consumption of  $[(\alpha\text{-diimine})\text{Pd}\{\text{CMe}_2(\text{OSiMe}_2\text{Ph})\}][\text{SbF}_6]$  (**5d**) at 20 °C: expansion of  $\delta$  0.8-0.1. The bottom spectrum is the starting point of the reaction, the second to the bottom spectrum corresponds to ca. 50% completion and the second to the top spectrum corresponds to ca. 90% completion. The top spectrum shows the conversion of  $\text{PhMe}_2\text{SiOH}$  to  $\text{PhMe}_2\text{SiOSiMe}_2\text{Ph}$ . For kinetics analysis see Figure 6.21 and Figure 6.22.

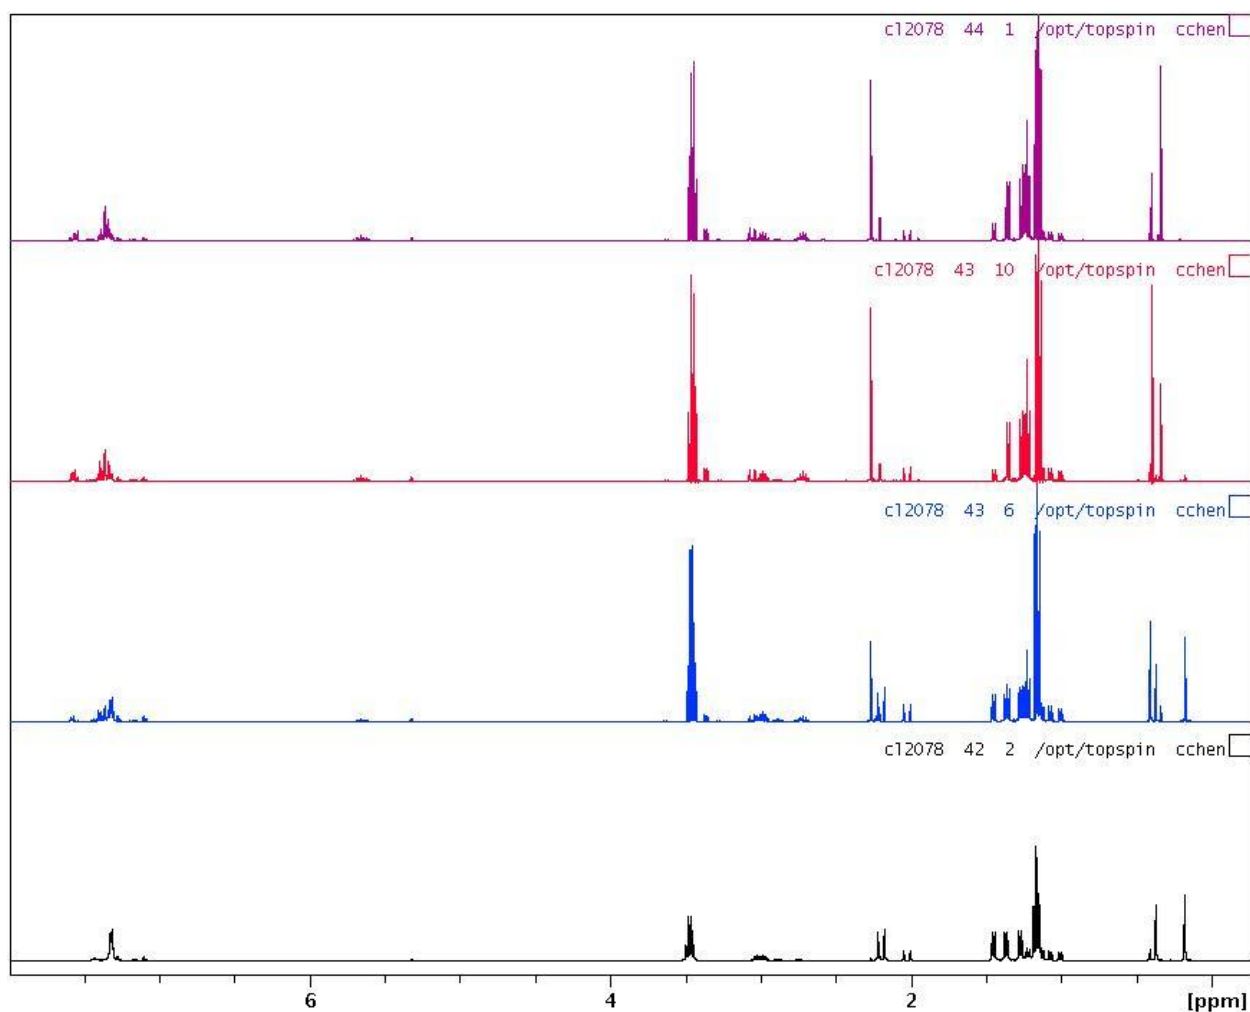

**Figure 10-6e.** Selected spectra for the first-order consumption of  $[(\alpha\text{-diimine})\text{Pd}\{\text{CMe}_2(\text{OSiMe}_2\text{Ph})\}][\text{B}(\text{C}_6\text{F}_5)_4]$  (**5d**) at 20 °C: full spectra. The bottom spectrum is the starting point of the reaction, the second to the bottom spectrum corresponds to ca. 50% completion and the second to the top spectrum corresponds to ca. 90% completion. The top spectrum shows the conversion of  $\text{PhMe}_2\text{SiOH}$  to  $\text{PhMe}_2\text{SiOSiMe}_2\text{Ph}$ . For kinetics analysis see Figure 6.9 and Figure 6.10.

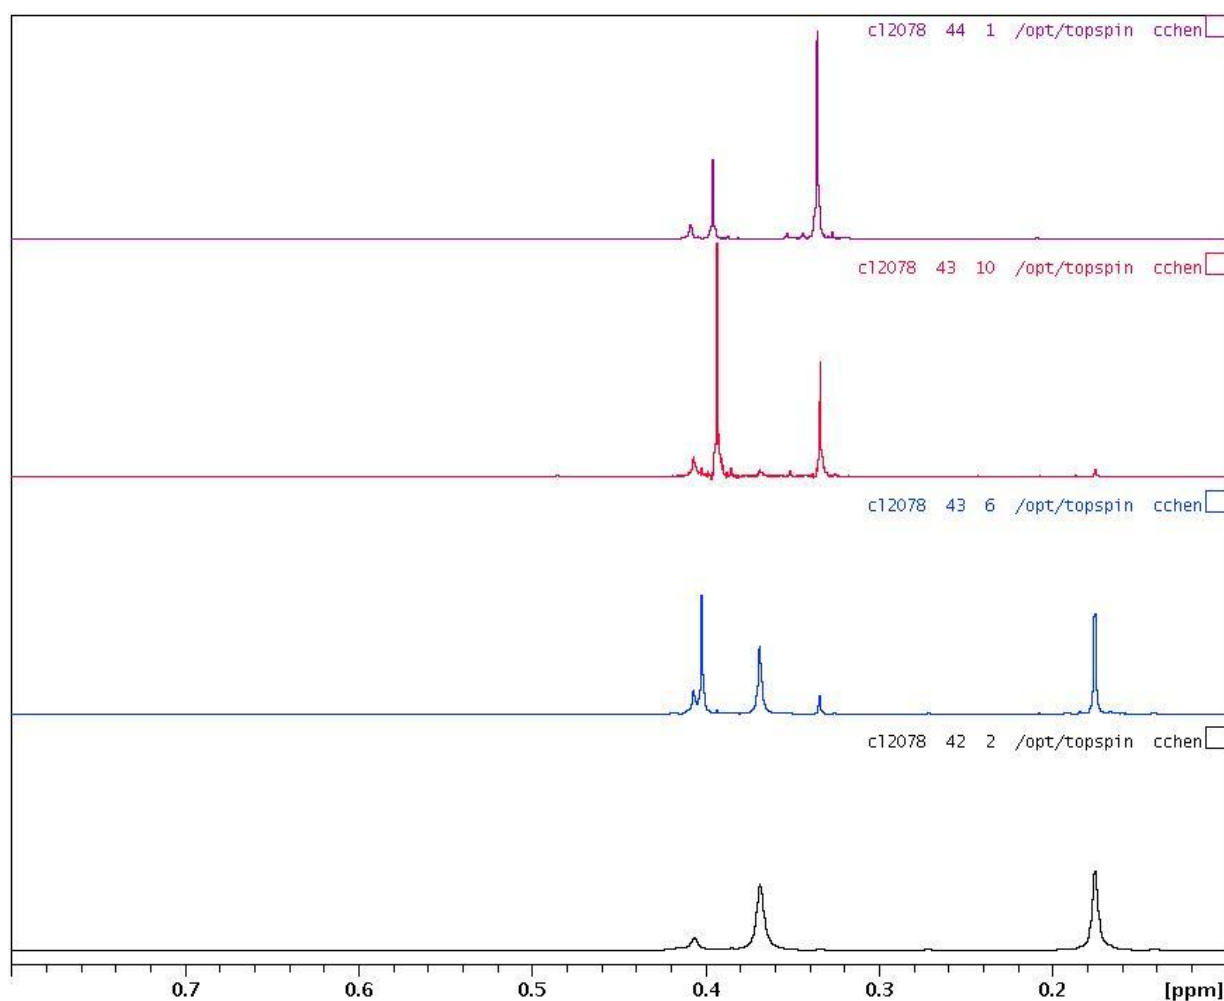

**Figure 10-6f.** Selected spectra for the first-order consumption of  $[(\alpha\text{-diimine})\text{Pd}\{\text{CMe}_2(\text{OSiMe}_2\text{Ph})\}][\text{B}(\text{C}_6\text{F}_5)_4]$  (**5d**) at 20 °C: expansion of  $\delta$  0.8-0.1. The bottom spectrum is the starting point of the reaction, the second to the bottom spectrum corresponds to ca. 50% completion and the second to the top spectrum corresponds to ca. 90% completion. The top spectrum shows the conversion of  $\text{PhMe}_2\text{SiOH}$  to  $\text{PhMe}_2\text{SiOSiMe}_2\text{Ph}$ . For kinetics analysis see Figure 6.9 and Figure 6.10.

### 10.7 Selected $^1\text{H}$ NMR spectra for $\text{CH}_2=\text{CHSiMe}_2\text{Ph}$ case.

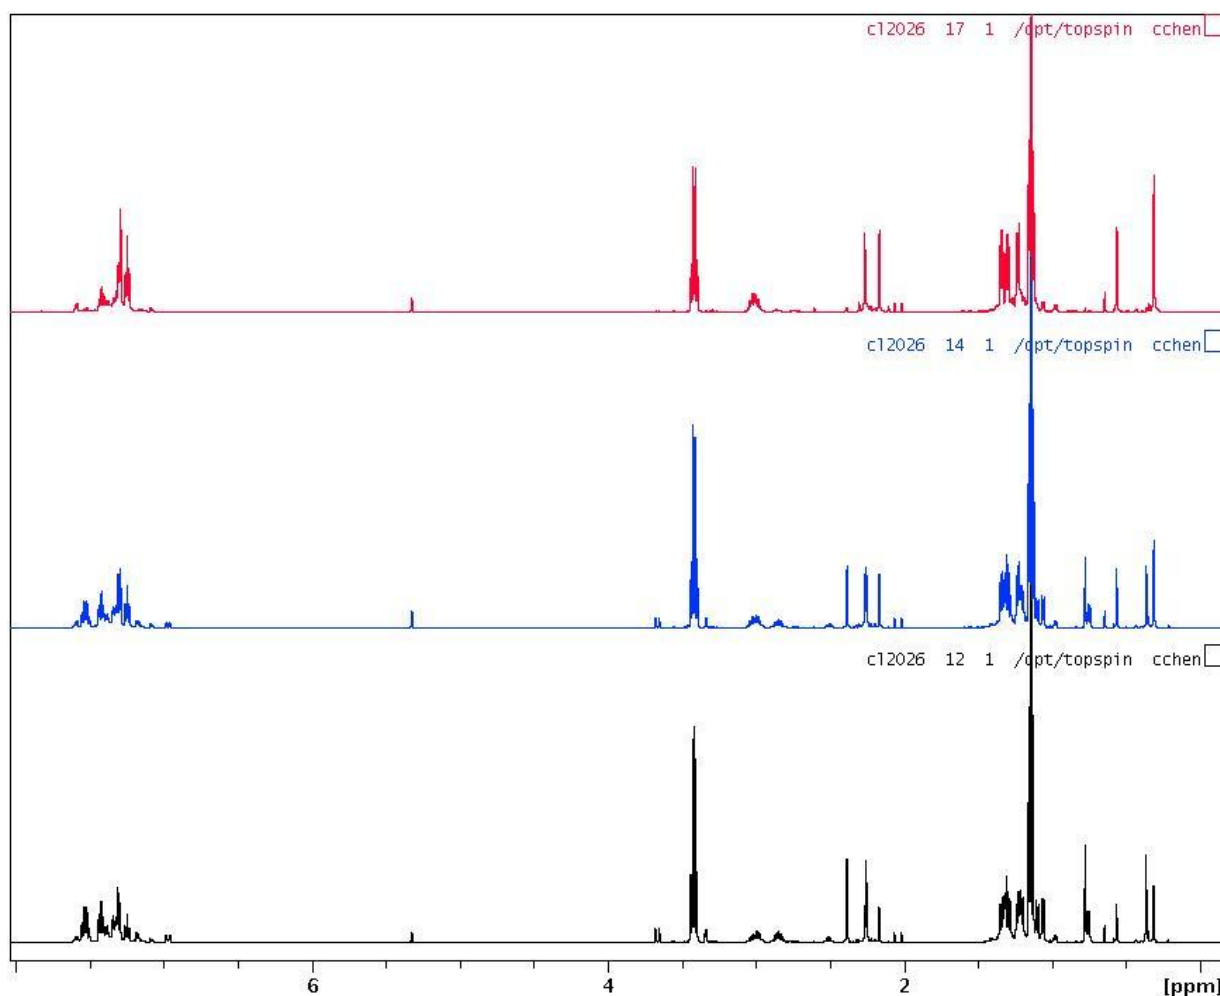

**Figure 10-7a.** Selected spectra for the first-order consumption of  $[(\alpha\text{-diimine})\text{PdMe}(\text{CH}_2=\text{CHOSiMePh}_2)][\text{SbF}_6]$  (**3e**) at 0 °C: full spectra. The bottom spectrum is the starting point of the reaction, the middle spectrum corresponds to ca. 50% completion and the top spectrum corresponds to ca. 90% completion. For kinetics analysis see Figure 6.23 and Figure 6.24.

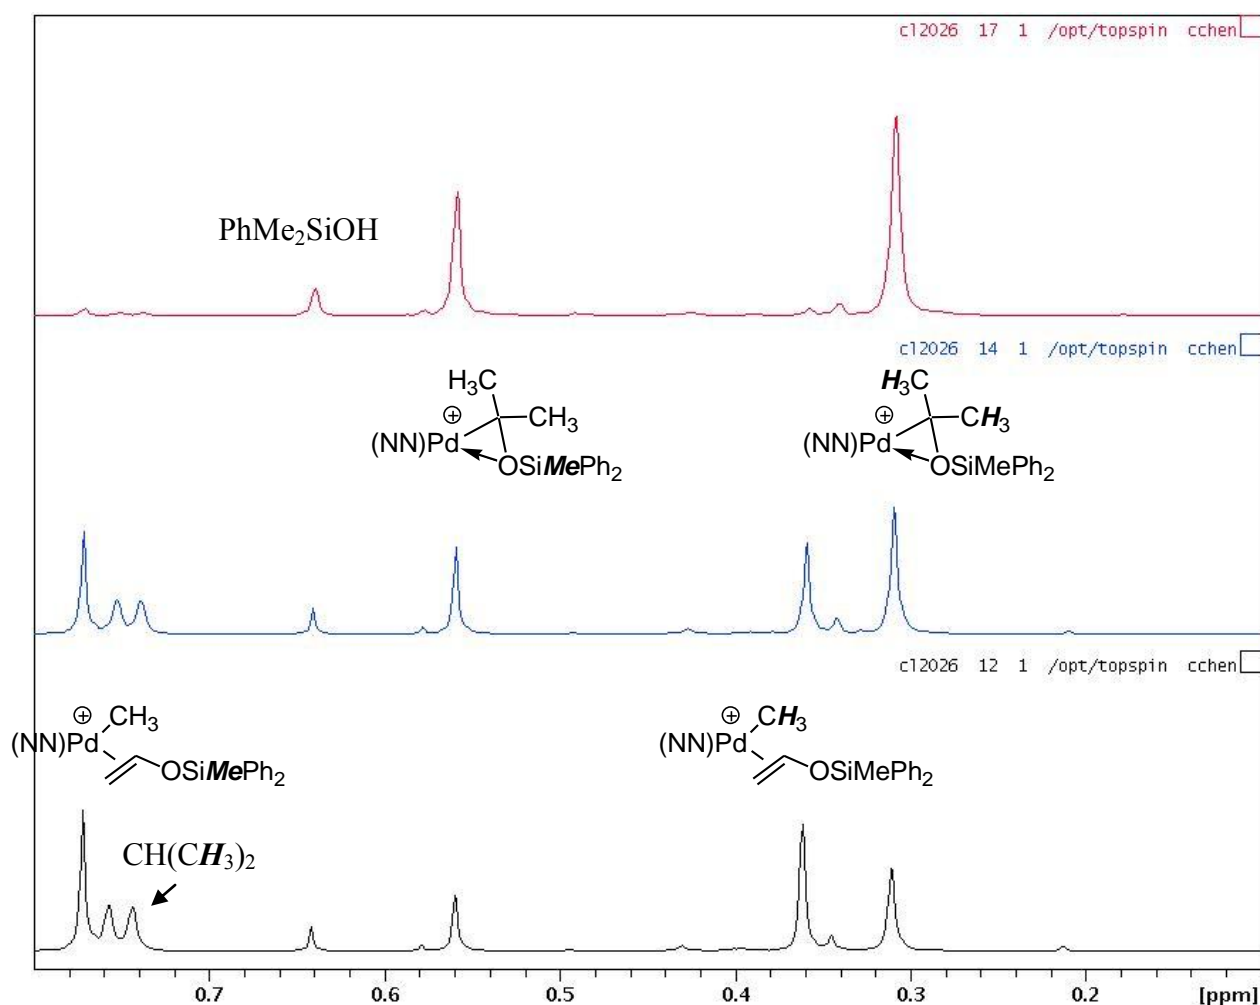

**Figure 10-7b.** Selected spectra for the first-order consumption of  $[(\alpha\text{-diimine})\text{PdMe}(\text{CH}_2=\text{CHOSiMePh}_2)][\text{SbF}_6]$  (**3e**) at 0 °C: expansion of  $\delta$  0.8-0.1. The bottom spectrum is the starting point of the reaction, the middle spectrum corresponds to ca. 50% completion and the top spectrum corresponds to ca. 90% completion. For kinetics analysis see Figure 6.23 and Figure 6.24.



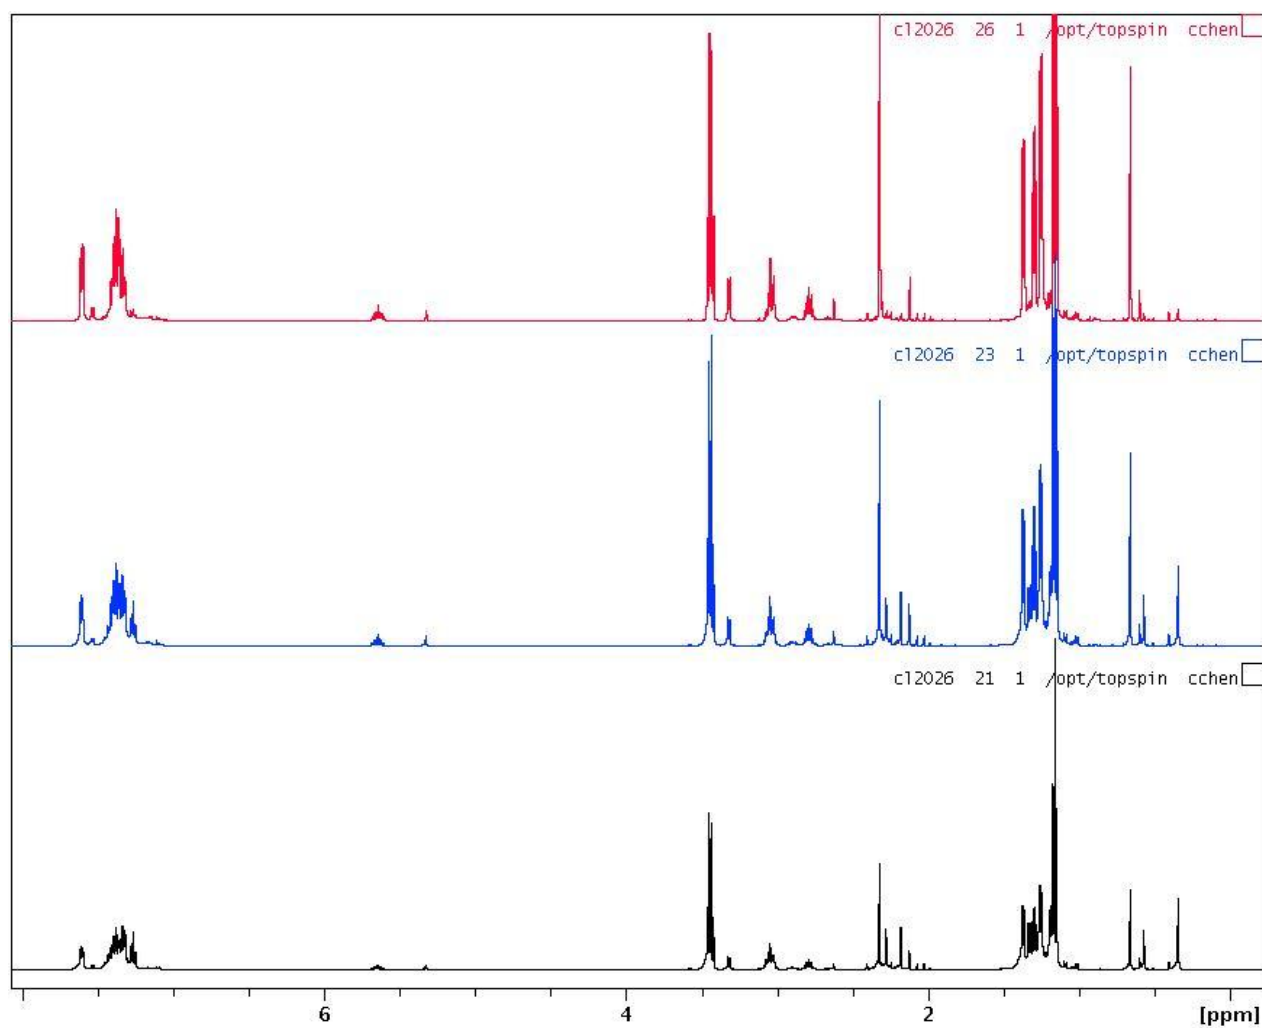

**Figure 10-7c.** Selected spectra for the first-order consumption of  $[(\alpha\text{-diimine})\text{Pd}\{\text{CMe}_2(\text{OSiMePh}_2)\}][\text{SbF}_6]$  (**5e**) at 20 °C: full spectra. The bottom spectrum is the starting point of the reaction, the middle spectrum corresponds to ca. 50% completion and the top spectrum corresponds to ca. 90% completion. For kinetics analysis see Figure 6.25 and Figure 6.26.

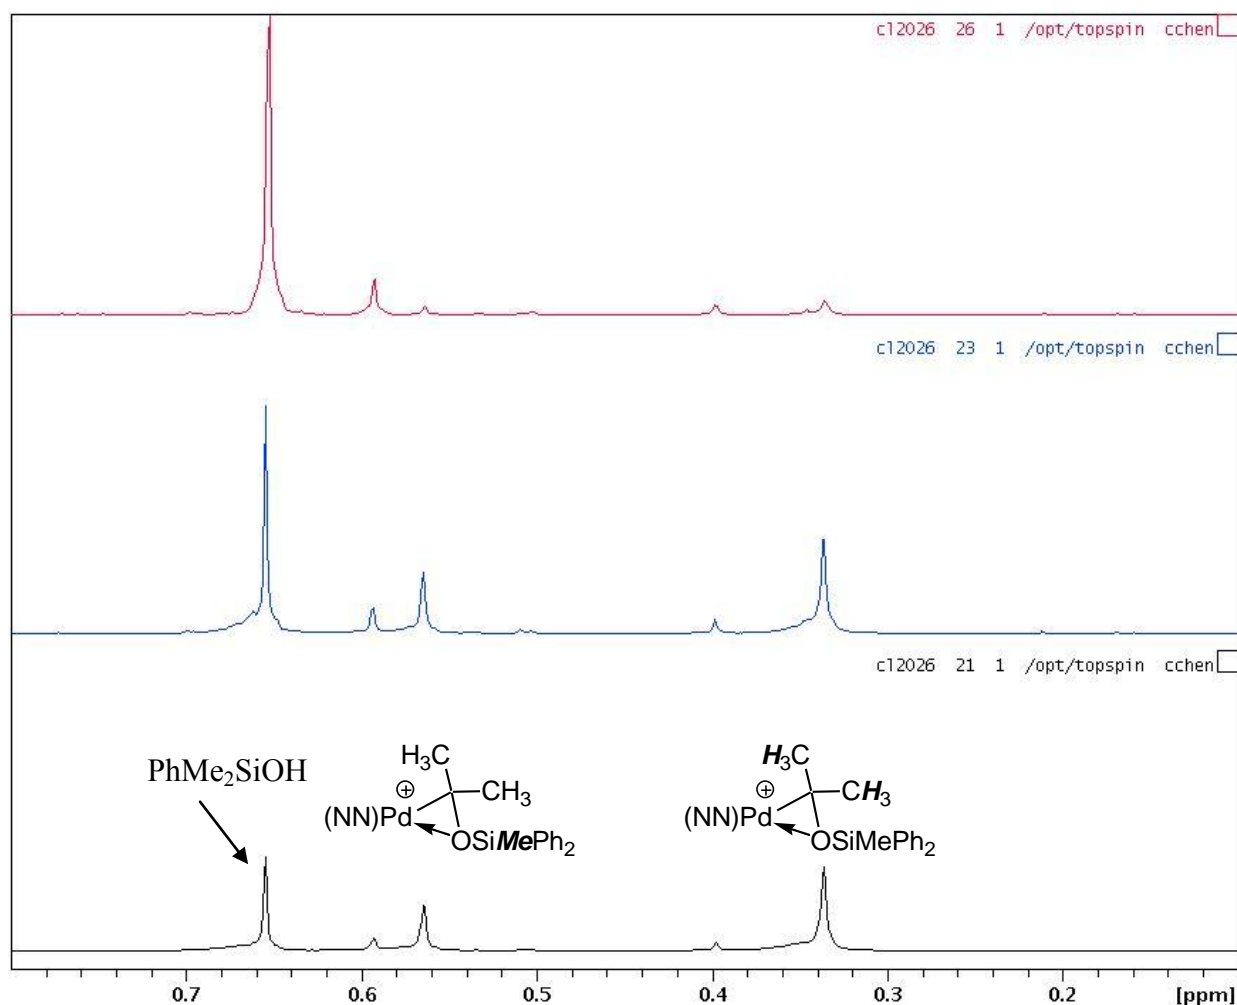

**Figure 10-7d.** Selected spectra for the first-order consumption of  $[(\alpha\text{-diimine})\text{Pd}\{\text{CMe}_2(\text{OSiMePh}_2)\}][\text{SbF}_6]$  (**5e**) at 20 °C: expansion of  $\delta$  0.8-0.1. The bottom spectrum is the starting point of the reaction, the middle spectrum corresponds to ca. 50% completion and the top spectrum corresponds to ca. 90% completion. For kinetics analysis see Figure 6.25 and Figure 6.26.

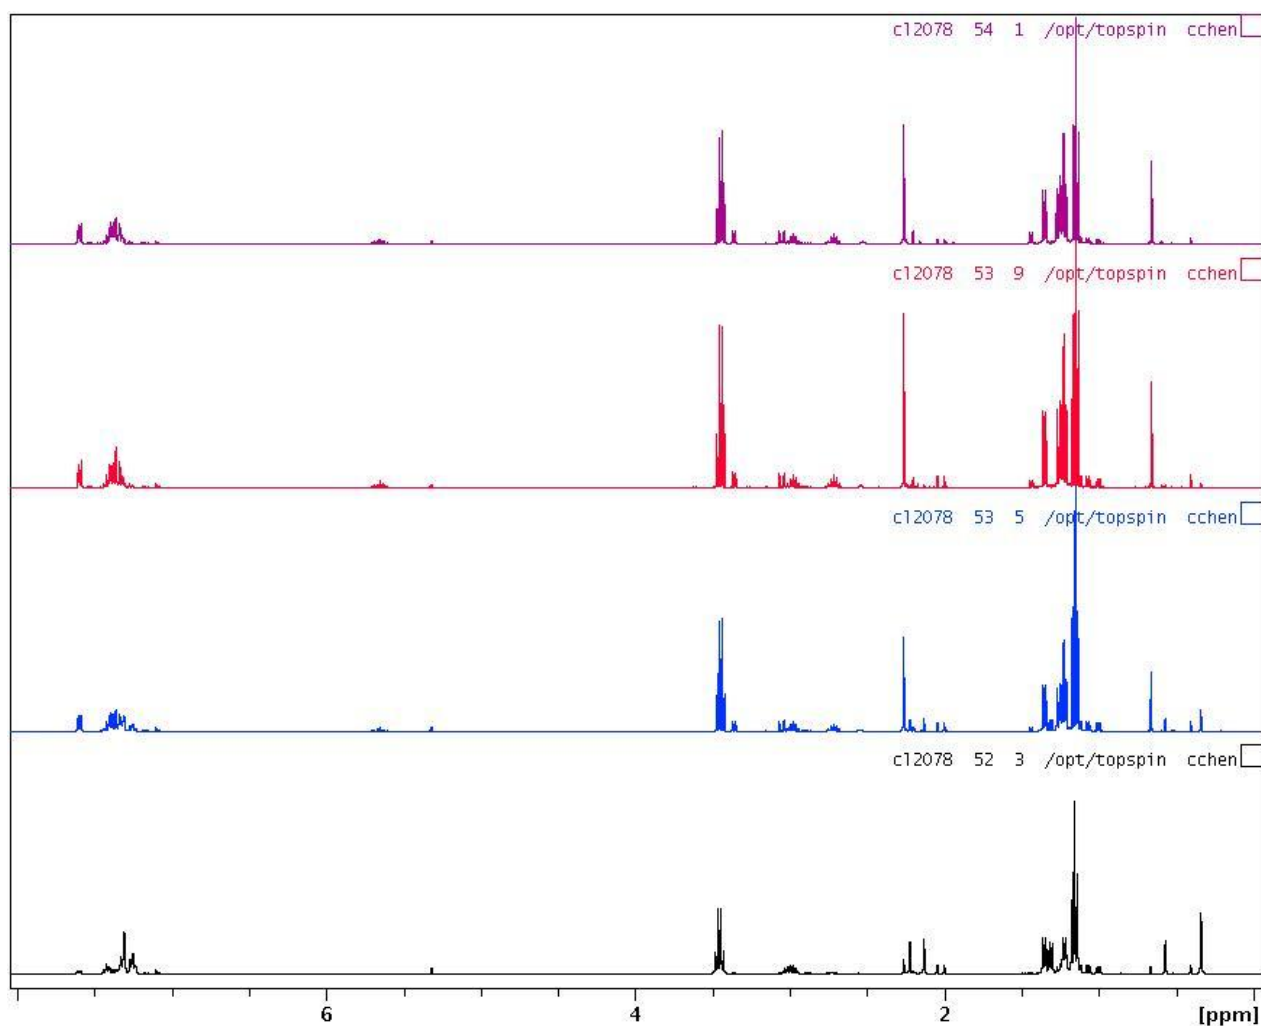

**Figure 10-7e.** Selected spectra for the first-order consumption of  $[(\alpha\text{-diimine})\text{Pd}\{\text{CMe}_2(\text{OSiMePh}_2)\}][\text{B}(\text{C}_6\text{F}_5)_4]$  (**5e**) at 20 °C: full spectra. The bottom spectrum is the starting point of the reaction, the second to the bottom spectrum corresponds to ca. 50% completion and the second to the top spectrum corresponds to ca. 90% completion. The top spectrum shows  $\text{Ph}_2\text{MeSiOH}$  does not convert to  $\text{Ph}_2\text{MeSiOSiMePh}_2$ . For kinetics analysis see Figure 6.11, Figure 6.12 and Figure 6.13.

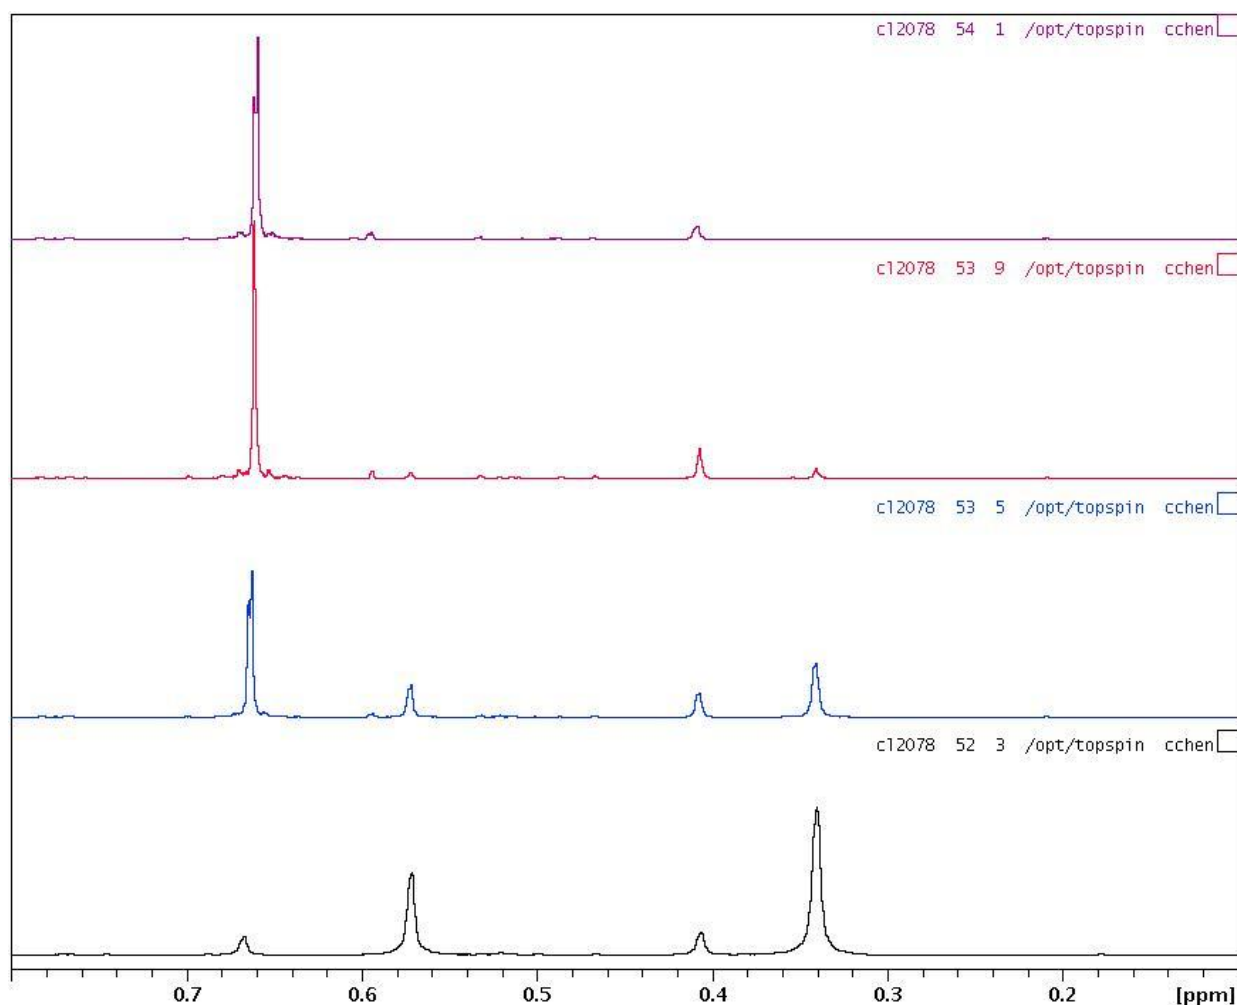

**Figure 10-7f.** Selected spectra for the first-order consumption of  $[(\alpha\text{-diimine})\text{Pd}\{\text{CMe}_2(\text{OSiMePh}_2)\}][\text{B}(\text{C}_6\text{F}_5)_4]$  (**5e**) at 20 °C: expansion of  $\delta$  0.8-0.1. The bottom spectrum is the starting point of the reaction, the second to the bottom spectrum corresponds to ca. 50% completion and the second to the top spectrum corresponds to ca. 90% completion. The top spectrum shows  $\text{Ph}_2\text{MeSiOH}$  does not convert to  $\text{Ph}_2\text{MeSiOSiMePh}_2$ . For kinetics analysis see Figure 6.11, Figure 6.12 and Figure 6.13.

### 10.8 Selected $^1\text{H}$ NMR spectra for $\text{CH}_2=\text{CHSiPh}_3$ case:

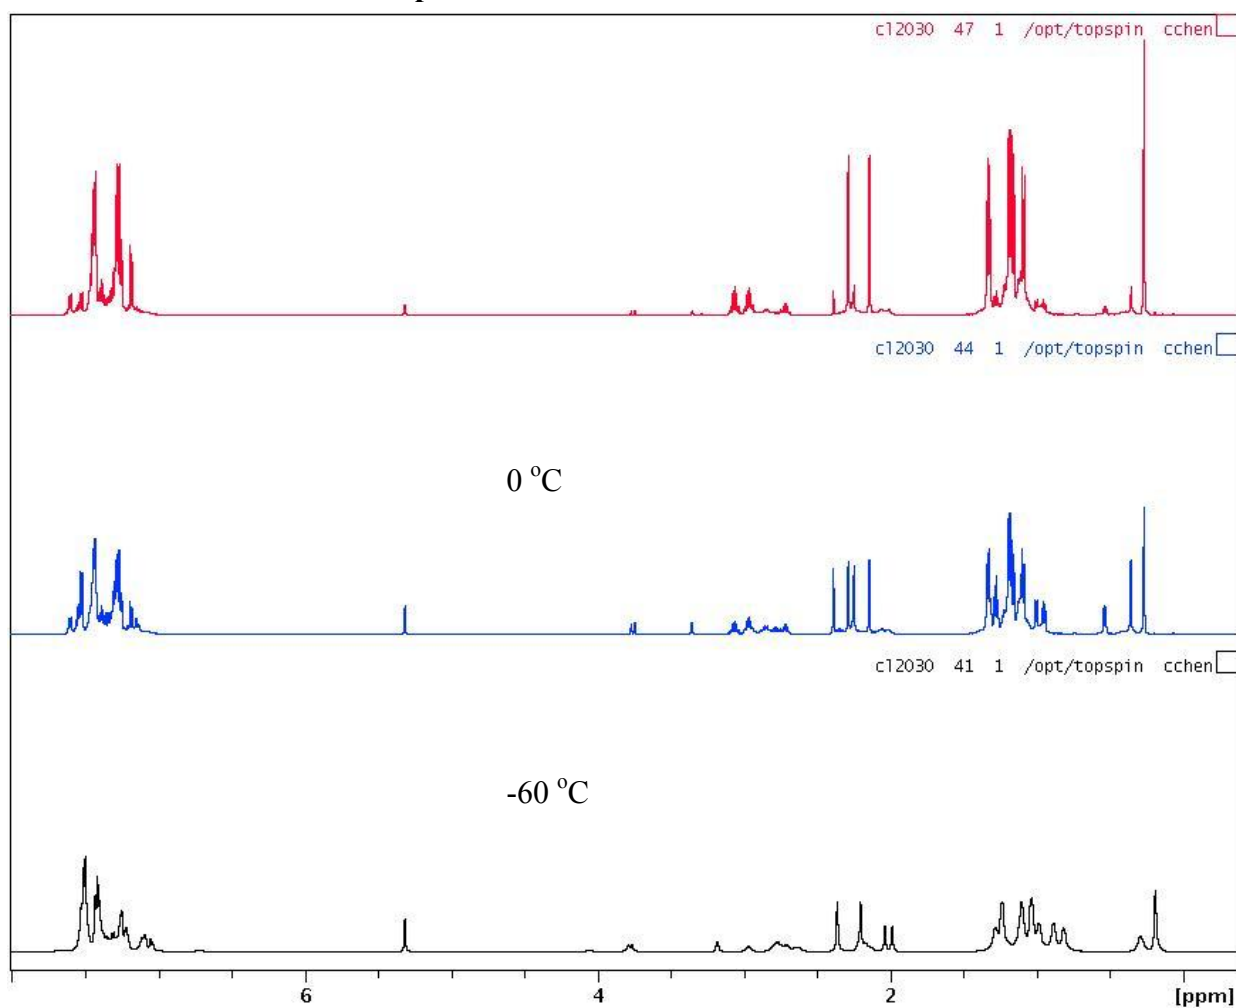

**Figure 10-8a.** Selected spectra for the first-order consumption of  $[(\alpha\text{-diimine})\text{PdMe}(\text{CH}_2=\text{CHOSiPh}_3)][\text{SbF}_6]$  (**3f**) at 0 °C: full spectra. The bottom spectrum is the starting point of the reaction at -60 °C, the middle spectrum corresponds to ca. 50% completion at 0 °C and the top spectrum corresponds to ca. 90% completion at 0 °C. For kinetics analysis see Figure 6.27 and Figure 6.28.

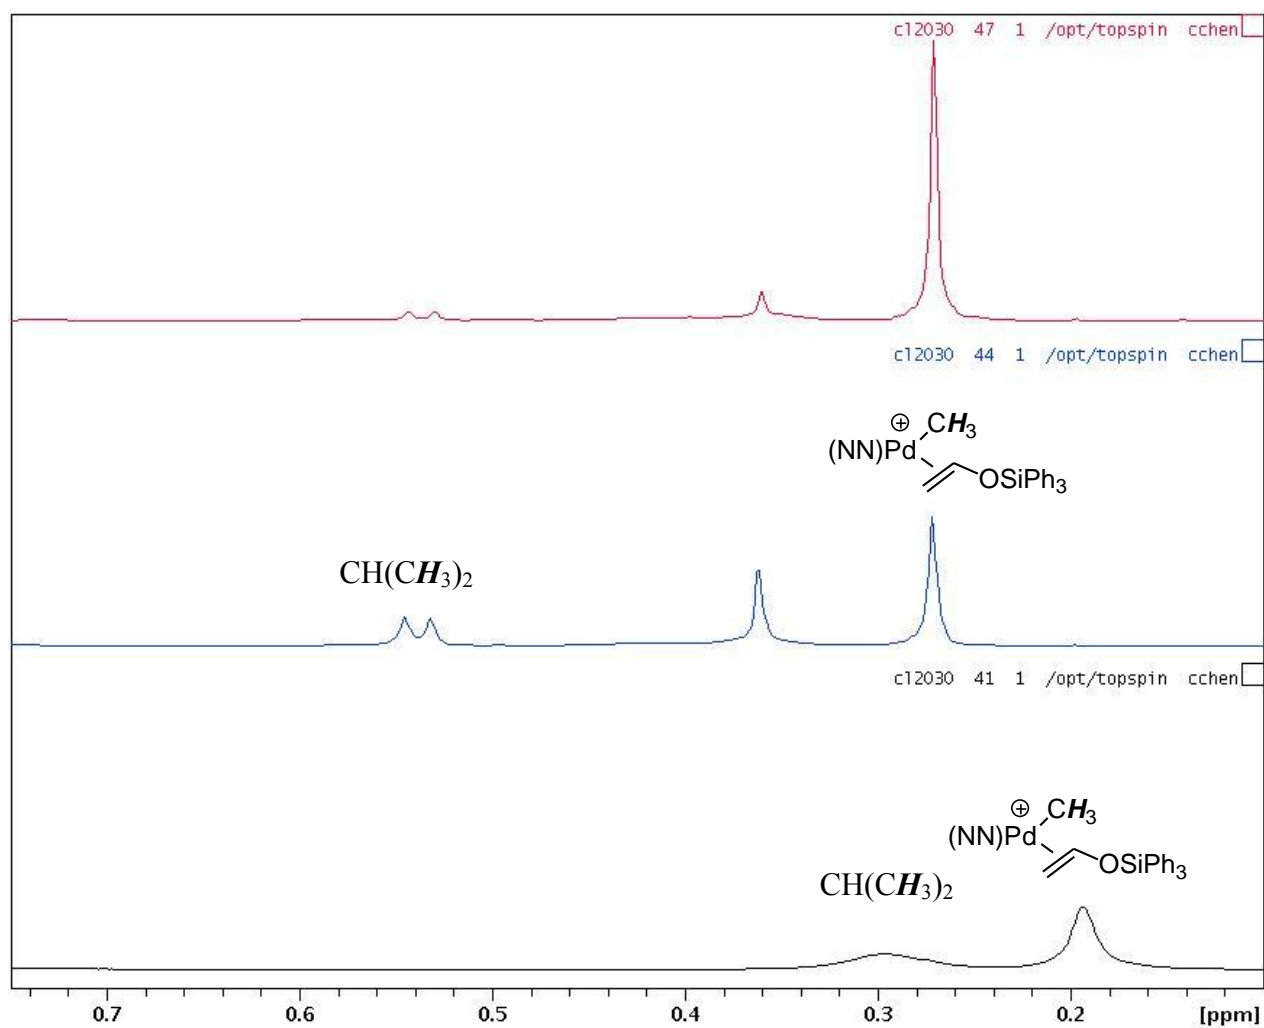

**Figure 10-8b.** Selected spectra for the first-order consumption of  $[(\alpha\text{-diimine})\text{PdMe}(\text{CH}_2=\text{CHOSiPh}_3)][\text{SbF}_6]$  (**3f**) at  $0^\circ\text{C}$ : expansion of  $\delta$  0.8-0.1. The bottom spectrum is the starting point of the reaction at  $-60^\circ\text{C}$ , the middle spectrum corresponds to ca. 50% completion at  $0^\circ\text{C}$  and the top spectrum corresponds to ca. 90% completion at  $0^\circ\text{C}$ . For kinetics analysis see Figure 6.27 and Figure 6.28.

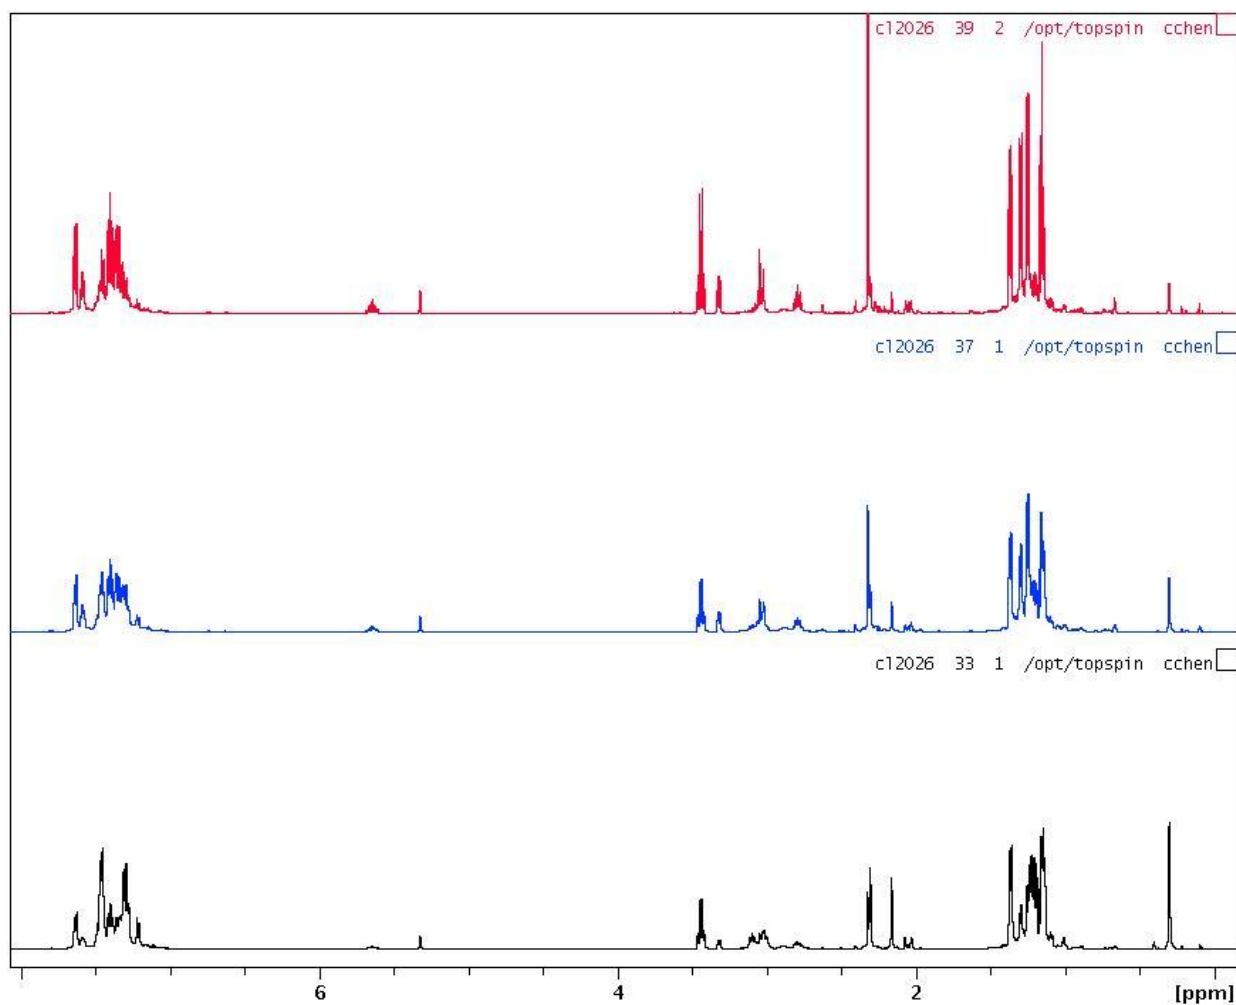

**Figure 10-8c.** Selected spectra for the first-order consumption of  $[(\alpha\text{-diimine})\text{Pd}\{\text{CMe}_2(\text{OSiPh}_3)\}][\text{SbF}_6]$  (**5f**) at 20 °C: full spectra. The bottom spectrum is the starting point of the reaction, the middle spectrum corresponds to ca. 50% completion and the top spectrum corresponds to ca. 90% completion. For kinetics analysis see Figure 6.29 and Figure 6.30.

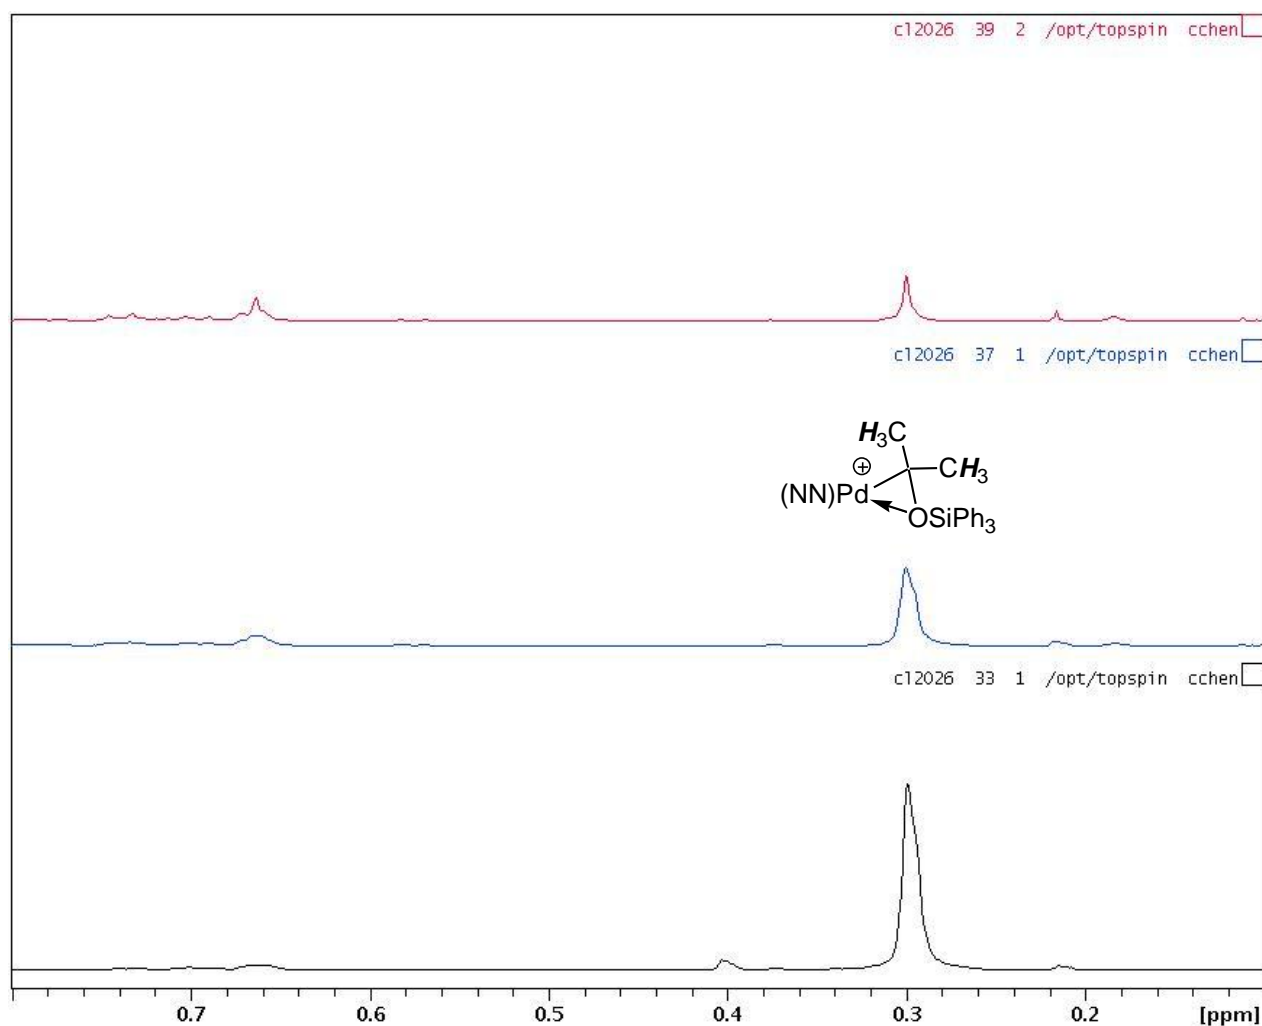

**Figure 10-8d.** Selected spectra for the first-order consumption of  $[(\alpha\text{-diimine})\text{Pd}\{\text{CMe}_2(\text{OSiPh}_3)\}][\text{SbF}_6]$  (**5f**) at 20 °C: expansion of  $\delta$  0.8-0.1. The bottom spectrum is the starting point of the reaction, the middle spectrum corresponds to ca. 50% completion and the top spectrum corresponds to ca. 90% completion. For kinetics analysis see Figure 6.29 and Figure 6.30.



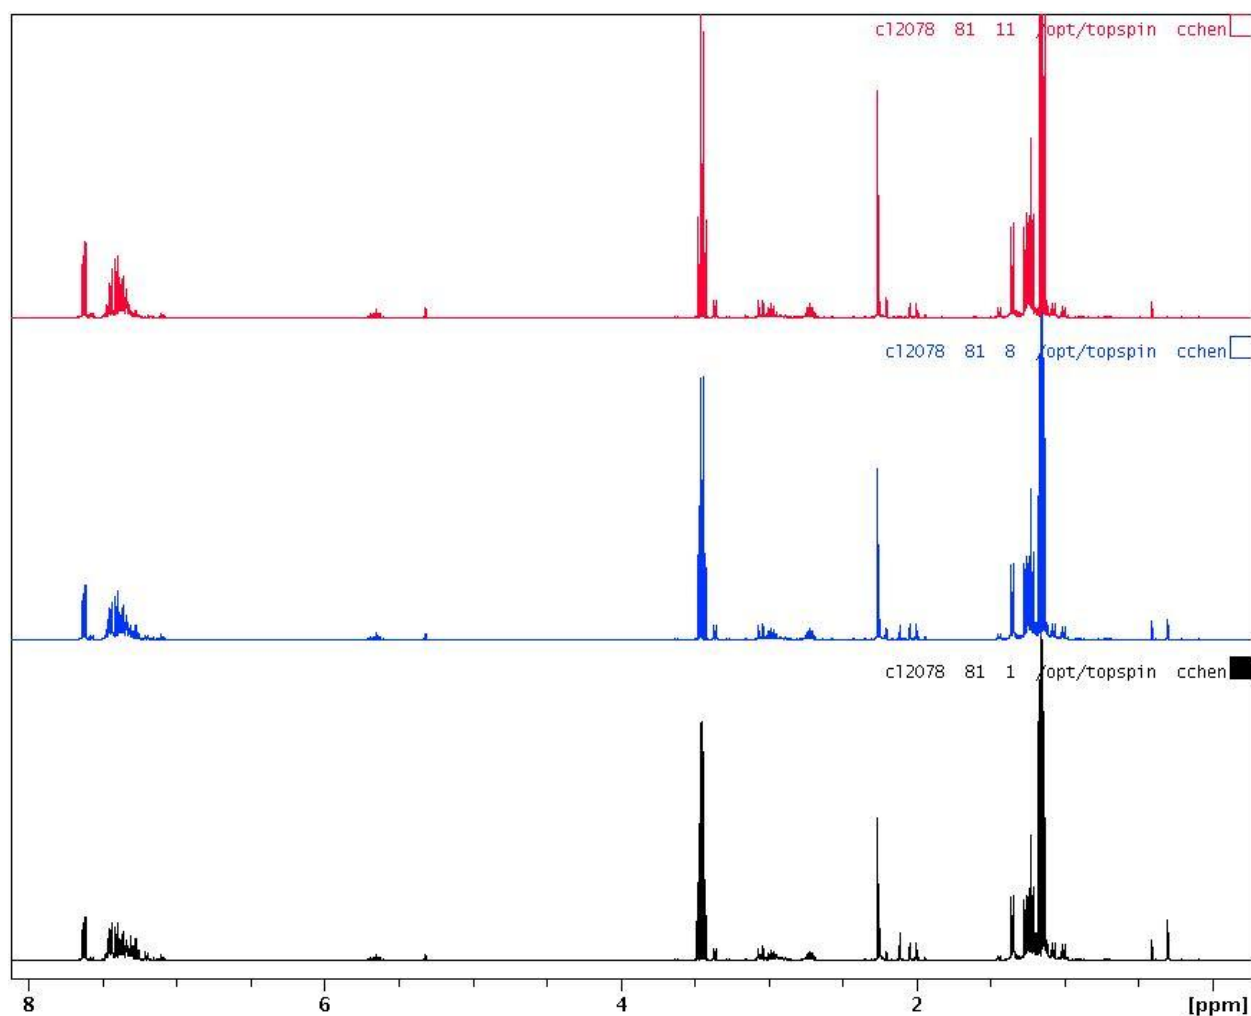

**Figure 10-8e.** Selected spectra for the first-order consumption of  $[(\alpha\text{-diimine})\text{Pd}\{\text{CMe}_2(\text{OSiPh}_3)\}][\text{B}(\text{C}_6\text{F}_5)_4]$  (**5f**) at 20 °C: full spectra. The bottom spectrum is the starting point of the reaction, the middle spectrum corresponds to ca. 50% completion and the top spectrum corresponds to ca. 90% completion. For kinetics analysis see Figure 6.14 and Figure 6.15.

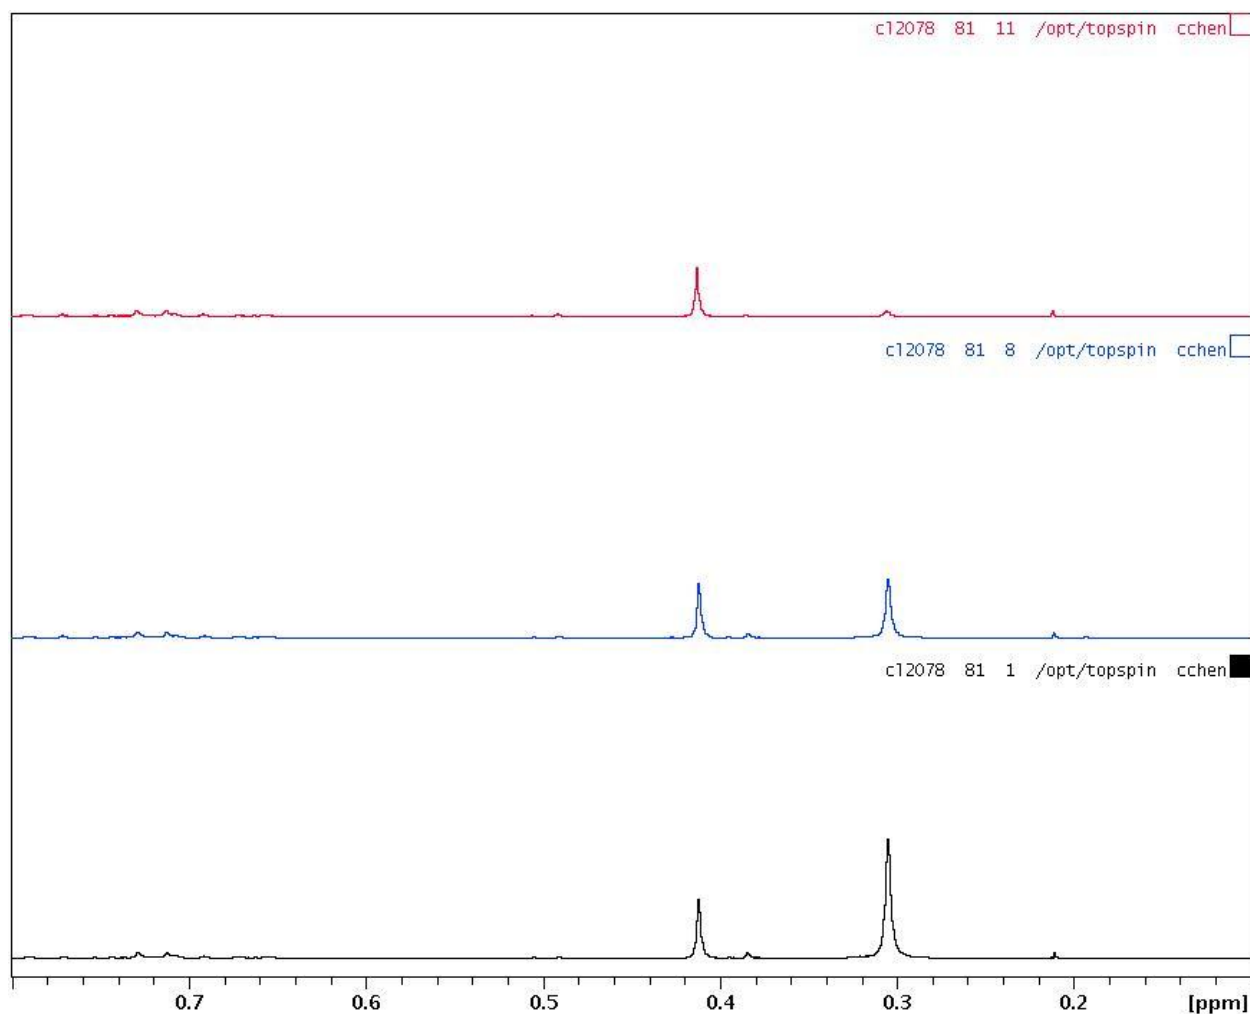

**Figure 10-8f.** Selected spectra for the first-order consumption of  $[(\alpha\text{-diimine})\text{Pd}\{\text{CMe}_2(\text{OSiPh}_3)\}][\text{B}(\text{C}_6\text{F}_5)_4]$  (**5f**) at 20 °C: expansion of  $\delta$  0.8-0.1. The bottom spectrum is the starting point of the reaction, the middle spectrum corresponds to ca. 50% completion and the top spectrum corresponds to ca. 90% completion. For kinetics analysis see Figure 6.14 and Figure 6.15.

## 11 References

---

- <sup>1</sup> NMR tube experiments demonstrated that poly(vinyl trimethylsilyl ether) had formed prior to hydrolysis in methanol. <sup>1</sup>H NMR (C<sub>6</sub>D<sub>5</sub>Cl): δ 4.15 (br s, 1H, CH), 1.85 (br s, 2H, CH<sub>2</sub>), 0.29 (br, 9H, SiMe<sub>3</sub>).
- <sup>2</sup> The CH<sub>2</sub>=CHOPh resonances of **2e** were broad at -60 °C.
- <sup>3</sup> Key NMR data for C<sub>2</sub>H<sub>5</sub>OH: <sup>1</sup>H NMR (CD<sub>2</sub>Cl<sub>2</sub>, 20 °C): δ 3.73 (d of q, J = 6, 7 Hz, 2H, OCH<sub>2</sub>CH<sub>3</sub>), 1.71 (t, J = 6 Hz, 1H, OH), 1.17 (t, J = 6 Hz, 3H, OCH<sub>2</sub>CH<sub>3</sub>).
- <sup>4</sup> Key NMR data for Me<sub>3</sub>SiOH: <sup>1</sup>H NMR (CD<sub>2</sub>Cl<sub>2</sub>, 20 °C): δ 2.57 ((b, SiOH), 0.14 (s, SiMe). Key NMR data for Me<sub>3</sub>SiOSiMe<sub>3</sub>: <sup>1</sup>H NMR (CD<sub>2</sub>Cl<sub>2</sub>, 20 °C): δ 0.07 (s, SiMe).
- <sup>5</sup> Key NMR data for PhMe<sub>2</sub>SiOH: <sup>1</sup>H NMR (CD<sub>2</sub>Cl<sub>2</sub>, 20 °C): δ 2.45 ((b, SiOH), 0.34 (s, SiMe). Key NMR data for PhMe<sub>2</sub>SiOSiMe<sub>2</sub>Ph: <sup>1</sup>H NMR (CD<sub>2</sub>Cl<sub>2</sub>, 20 °C): δ 0.40 (s, SiMe).
- <sup>6</sup> Key NMR data for Ph<sub>2</sub>MeSiOH: <sup>1</sup>H NMR (CD<sub>2</sub>Cl<sub>2</sub>, 20 °C): δ 2.51 ((b, SiOH), 0.66 (s, SiMe).
- <sup>7</sup> NMR data for Ph<sub>3</sub>SiOH: <sup>1</sup>H NMR (CD<sub>2</sub>Cl<sub>2</sub>, 20 °C): δ 7.63 (t, H<sub>meta</sub>), 7.44 (d, H<sub>ortho</sub>), 7.39 (t, H<sub>para</sub>), 2.87 (b, SiOH).
- <sup>8</sup> The α-diimine aromatic signal overlap with OSiPh<sub>3</sub> signals.
- <sup>9</sup> The simulation was done by using Kintecus software. Ianni, J. *Kintecus* V3.8.
- <sup>10</sup> Complete citation for reference 73 in the paper.

Gaussian 03, Revision C.02, Frisch, M. J.; Trucks, G. W.; Schlegel, H. B.; Scuseria, G. E.; Robb, M. A.; Cheeseman, J. R.; Montgomery, Jr., J. A.; Vreven, T.; Kudin, K. N.; Burant, J. C.; Millam, J. M.; Iyengar, S. S.; Tomasi, J.; Barone, V.; Mennucci, B.; Cossi, M.; Scalmani, G.; Rega, N.; Petersson, G. A.; Nakatsuji, H.; Hada, M.; Ehara, M.; Toyota, K.; Fukuda, R.; Hasegawa, J.; Ishida, M.; Nakajima, T.; Honda, Y.; Kitao, O.; Nakai, H.; Klene, M.; Li, X.; Knox, J. E.; Hratchian, H. P.; Cross, J. B.; Bakken, V.; Adamo, C.; Jaramillo, J.; Gomperts, R.; Stratmann, R. E.; Yazyev, O.; Austin, A. J.; Cammi, R.; Pomelli, C.; Ochterski, J. W.; Ayala, P. Y.; Morokuma, K.; Voth, G. A.; Salvador, P.; Dannenberg, J. J.; Zakrzewski, V. G.; Dapprich, S.; Daniels, A. D.; Strain, M. C.; Farkas, O.; Malick, D. K.; Rabuck, A. D.; Raghavachari, K.; Foresman, J. B.; Ortiz, J. V.; Cui, Q.; Baboul, A. G.; Clifford, S.; Cioslowski, J.; Stefanov, B. B.; Liu, G.; Liashenko, A.; Piskorz, P.; Komaromi, I.; Martin, R. L.; Fox, D. J.; Keith, T.; Al-Laham, M. A.; Peng, C. Y.; Nanayakkara, A.; Challacombe, M.; Gill, P. M. W.; Johnson, B.; Chen, W.; Wong, M. W.; Gonzalez, C.; and Pople, J. A.; Gaussian, Inc., Wallingford CT, 2004.

- <sup>11</sup> Pd-OR<sub>2</sub> distances in square planar Pd(II) complexes are in the range 2.11-2.20 Å. (a) Bei, X.; Uno, T.; Norris, J.; Turner, H. W.; Weinberg, W. H.; Guram, A. S. *Organometallics* **1999**, 18, 1840. (b) Kim, Y.; Verkade, J. G. *J. Organomet. Chem.* **2003**, 669, 32.
